# Supplementary material for: The Use of Innovative Two-Component Cluster Analysis and Serodiagnostic Cut-Off Methods to Estimate Prevalence of Pertussis Reinfections
Source: PubMed Central journal article supplement (PMC4743910; doi:10.1371/journal.pone.0148507), 2016-02-05
Supplement: pone.0148507.s001.pdf [file pone.0148507.s001.pdf]

**SKI cohort of 292 (ex) symptomatic pertussis patients, n=331 samples**

| USN     | Age (yrs) | Age group      | Mnth<br>p.exp. | last exposure<br>Vacc. or Inf. | IgA-Ptx (IU/ml) | IgG-Ptx (IU/ml) |
|---------|-----------|----------------|----------------|--------------------------------|-----------------|-----------------|
| CI55099 | 1.0       | under-fours    | 0.20           | Vacc                           | 0.2             | 36.0            |
| HU11101 | 10.3      | schoolchildren | 0.30           | Inf                            | 14.6            | 300.8           |
| HU21801 | 54.5      | adults         | 0.33           | Inf                            | 37.7            | 146.5           |
| HU21001 | 67.0      | (pre-) elderly | 0.39           | Inf                            | 357.5           | 308.6           |
| GH16201 | 26.9      | adults         | 0.39           | Inf                            | 8.2             | 219.0           |
| HU21201 | 66.6      | (pre-) elderly | 0.39           | Inf                            | 41.1            | 149.0           |
| HU07501 | 8.5       | schoolchildren | 0.43           | Inf                            | 6.7             | 215.2           |
| HU21601 | 59.1      | (pre-) elderly | 0.46           | Inf                            | 8.1             | 467.7           |
| HU20901 | 73.9      | (pre-) elderly | 0.46           | Inf                            | 1000.0          | 352.9           |
| HU11001 | 13.3      | adolescents    | 0.49           | Inf                            | 58.4            | 433.3           |
| HU20801 | 78.9      | (pre-) elderly | 0.49           | Inf                            | 20.6            | 310.4           |
| HU10901 | 12.5      | adolescents    | 0.49           | Inf                            | 9.2             | 92.0            |
| HU16901 | 52.4      | adults         | 0.53           | Inf                            | 50.1            | 1606.9          |
| HU01001 | 3.1       | under-fours    | 0.56           | Inf                            | 12.3            | 642.4           |
| HU01021 | 7.9       | schoolchildren | 0.56           | inf                            | 5.0             | 437.6           |
| HU21761 | 63.9      | (pre-) elderly | 0.56           | inf                            | 9.9             | 186.9           |
| HU21701 | 62.4      | (pre-) elderly | 0.56           | Inf                            | 32.4            | 142.3           |
| HU08301 | 9.8       | schoolchildren | 0.59           | Inf                            | 19.0            | 382.3           |
| HU16601 | 48.1      | adults         | 0.59           | Inf                            | 2.1             | 261.9           |
| HU20001 | 33.6      | adults         | 0.59           | Inf                            | 22.4            | 172.9           |
| HU11701 | 12.4      | adolescents    | 0.62           | Inf                            | 16.1            | 217.6           |
| HU05501 | 6.9       | schoolchildren | 0.62           | Inf                            | 3.4             | 190.4           |
| HU15412 | 54.0      | adults         | 0.62           | inf                            | 9.1             | 181.0           |
| HU15401 | 53.0      | adults         | 0.62           | Inf                            | 22.7            | 170.5           |
| HU15501 | 49.6      | adults         | 0.66           | Inf                            | 8.2             | 311.9           |
| HU10501 | 16.2      | adolescents    | 0.66           | Inf                            | 6.3             | 284.7           |
| HU00501 | 2.3       | under-fours    | 0.66           | Inf                            | 8.8             | 207.3           |
| HU20301 | 59.8      | (pre-) elderly | 0.66           | Inf                            | 6.9             | 205.6           |
| HU11301 | 11.4      | adolescents    | 0.66           | Inf                            | 2.7             | 65.8            |
| HU16101 | 49.2      | adults         | 0.69           | Inf                            | 182.2           | 236.8           |
| HU11401 | 11.1      | adolescents    | 0.69           | Inf                            | 8.7             | 209.2           |
| HU00601 | 3.8       | under-fours    | 0.69           | Inf                            | 7.7             | 116.8           |
| HU00701 | 3.3       | under-fours    | 0.69           | Inf                            | 0.2             | 21.0            |
| CI57299 | 3.8       | schoolchildren | 0.69           | Vacc                           | 0.5             | 20.2            |
| HU22101 | 66.5      | (pre-) elderly | 0.72           | Inf                            | 113.0           | 861.4           |
| HU10801 | 12.3      | adolescents    | 0.72           | Inf                            | 22.8            | 743.5           |
| HU15861 | 51.3      | adults         | 0.72           | inf                            | 108.8           | 672.1           |
| HU22161 | 67.7      | (pre-) elderly | 0.72           | inf                            | 148.9           | 484.5           |
| HU10701 | 15.1      | adolescents    | 0.72           | Inf                            | 67.5            | 290.8           |
| HU21501 | 66.1      | (pre-) elderly | 0.72           | Inf                            | 8.2             | 231.0           |
| HU15801 | 54.5      | adults         | 0.72           | Inf                            | 24.9            | 200.2           |
| HU15201 | 18.9      | adolescents    | 0.72           | Inf                            | 3.4             | 62.6            |
| HU22401 | 53.2      | adults         | 0.76           | Inf                            | 24.9            | 281.6           |
| HU15701 | 49.7      | adults         | 0.76           | Inf                            | 14.6            | 240.5           |
| HU16801 | 42.5      | adults         | 0.76           | Inf                            | 6.6             | 142.8           |
| HU05701 | 10.0      | schoolchildren | 0.79           | Inf                            | 197.5           | 690.2           |
| HU16001 | 51.7      | adults         | 0.79           | Inf                            | 42.0            | 395.0           |
| SP16301 | 52.8      | adults         | 0.79           | Inf                            | 49.0            | 366.4           |
| SP10201 | 15.4      | adolescents    | 0.79           | Inf                            | 13.8            | 335.3           |
| HU05101 | 4.6       | schoolchildren | 0.79           | Inf                            | 3.4             | 198.8           |
| HU11201 | 13.0      | adolescents    | 0.82           | Inf                            | 5.2             | 205.0           |
| HU17201 | 42.7      | adults         | 0.85           | Inf                            | 17.9            | 568.5           |
| SP10401 | 14.7      | adolescents    | 0.85           | Inf                            | 14.8            | 400.7           |

|         |      |                |      |     |       |        |
|---------|------|----------------|------|-----|-------|--------|
| HU22001 | 78.8 | (pre-) elderly | 0.85 | Inf | 60.6  | 290.2  |
| HU15901 | 48.8 | adults         | 0.85 | Inf | 43.0  | 212.5  |
| HU20201 | 71.8 | (pre-) elderly | 0.85 | Inf | 28.7  | 199.0  |
| HU20501 | 68.5 | (pre-) elderly | 0.85 | Inf | 23.2  | 117.3  |
| HU11901 | 16.0 | adolescents    | 0.89 | Inf | 58.3  | 883.8  |
| HU10601 | 14.6 | adolescents    | 0.89 | Inf | 8.1   | 422.1  |
| HU21101 | 61.9 | (pre-) elderly | 0.89 | Inf | 11.4  | 335.1  |
| HU11601 | 14.8 | adolescents    | 0.89 | Inf | 4.8   | 322.2  |
| HU17301 | 28.8 | adults         | 0.89 | Inf | 5.5   | 112.5  |
| HU16401 | 18.2 | adolescents    | 0.92 | Inf | 13.8  | 362.9  |
| HU15101 | 37.3 | adults         | 0.92 | Inf | 6.8   | 336.2  |
| HU16501 | 40.7 | adults         | 0.92 | Inf | 10.6  | 70.3   |
| HU11801 | 11.9 | adolescents    | 0.92 | Inf | 2.5   | 63.2   |
| HU16701 | 22.4 | adults         | 0.92 | Inf | 6.6   | 38.1   |
| HU10301 | 12.1 | adolescents    | 0.92 | Inf | 8.8   | 23.3   |
| HU00101 | 3.5  | under-fours    | 0.95 | Inf | 4.4   | 576.6  |
| HU05201 | 8.6  | schoolchildren | 0.95 | Inf | 13.3  | 279.9  |
| HU12001 | 13.7 | adolescents    | 0.95 | Inf | 52.9  | 270.8  |
| HU21401 | 67.9 | (pre-) elderly | 0.95 | Inf | 20.7  | 234.6  |
| HU20101 | 64.3 | (pre-) elderly | 0.95 | Inf | 12.7  | 230.1  |
| HU10101 | 12.9 | adolescents    | 0.95 | Inf | 44.1  | 97.2   |
| HU15601 | 23.6 | adults         | 0.95 | Inf | 1.2   | 38.4   |
| HU07011 | 39.9 | adults         | 0.99 | inf | 16.3  | 1578.6 |
| HU07001 | 6.9  | schoolchildren | 0.99 | Inf | 10.6  | 1047.9 |
| HU17001 | 47.9 | adults         | 0.99 | Inf | 17.2  | 1042.7 |
| HU20601 | 63.5 | (pre-) elderly | 0.99 | Inf | 471.0 | 834.2  |
| HU21301 | 73.9 | (pre-) elderly | 0.99 | Inf | 127.6 | 320.8  |
| HU11501 | 12.5 | adolescents    | 0.99 | Inf | 0.1   | 63.3   |
| HU20701 | 58.2 | (pre-) elderly | 1.02 | Inf | 69.0  | 153.1  |
| HU05301 | 8.4  | schoolchildren | 1.02 | Inf | 3.3   | 82.9   |
| HU15301 | 23.0 | adults         | 1.02 | Inf | 5.4   | 49.3   |
| HU00901 | 0.5  | under-fours    | 1.05 | Inf | 0.1   | 34.9   |
| HU50899 | 30.2 | adults         | 1.08 | Inf | 28.1  | 342.8  |
| HU06801 | 9.3  | schoolchildren | 1.08 | Inf | 5.3   | 202.6  |
| HU22701 | 81.2 | (pre-) elderly | 1.12 | Inf | 40.8  | 949.9  |
| HU51499 | 43.4 | adults         | 1.12 | Inf | 21.9  | 467.2  |
| HU21901 | 72.7 | (pre-) elderly | 1.12 | Inf | 7.4   | 327.4  |
| HU22301 | 58.3 | adults         | 1.12 | Inf | 3.7   | 143.7  |
| HU01301 | 3.7  | under-fours    | 1.12 | Inf | 11.3  | 93.0   |
| HU53499 | 5.5  | schoolchildren | 1.12 | Inf | 3.6   | 86.2   |
| HU23001 | 89.7 | (pre-) elderly | 1.15 | Inf | 472.6 | 1815.1 |
| HU53299 | 40.2 | adults         | 1.15 | Inf | 30.2  | 1620.9 |
| HU53599 | 9.5  | schoolchildren | 1.15 | Inf | 18.0  | 532.5  |
| HU06201 | 6.4  | schoolchildren | 1.15 | Inf | 4.1   | 296.5  |
| HU20401 | 65.2 | (pre-) elderly | 1.15 | Inf | 15.8  | 144.1  |
| HU51199 | 47.2 | adults         | 1.15 | Inf | 4.0   | 84.2   |
| HU08401 | 8.4  | schoolchildren | 1.18 | Inf | 3.0   | 230.9  |
| HU22201 | 75.8 | (pre-) elderly | 1.18 | Inf | 47.0  | 854.5  |
| HU22261 | 75.7 | (pre-) elderly | 1.18 | inf | 63.3  | 122.2  |
| HU53199 | 15.1 | adolescents    | 1.22 | Inf | 35.1  | 606.3  |
| HU53099 | 11.0 | adolescents    | 1.22 | Inf | 4.1   | 547.3  |
| HU52999 | 48.4 | adults         | 1.22 | Inf | 53.4  | 271.6  |
| HU06501 | 7.2  | schoolchildren | 1.22 | Inf | 4.9   | 262.8  |
| HU05401 | 9.2  | schoolchildren | 1.22 | Inf | 5.7   | 131.4  |
| HU01201 | 2.1  | under-fours    | 1.28 | Inf | 7.2   | 230.6  |
| HU51299 | 36.3 | adults         | 1.35 | Inf | 7.3   | 308.8  |

|         |      |                        |      |      |      |        |
|---------|------|------------------------|------|------|------|--------|
| HU22901 | 84.6 | (pre-) elderly         | 1.35 | Inf  | 86.1 | 184.8  |
| HU53399 | 16.3 | adolescents            | 1.35 | Inf  | 7.4  | 93.6   |
| HU06001 | 9.7  | schoolchildren         | 1.35 | Inf  | 1.3  | 32.6   |
| HU22601 | 82.4 | (pre-) elderly         | 1.38 | Inf  | 24.8 | 400.5  |
| SP52199 | 56.0 | (pre-) elderly         | 1.38 | Inf  | 11.4 | 327.1  |
| HU22501 | 78.7 | (pre-) elderly         | 1.38 | Inf  | 19.0 | 162.1  |
| HU22801 | 76.5 | (pre-) elderly         | 1.38 | Inf  | 5.6  | 105.8  |
| HU00401 | 2.0  | under-fours            | 1.38 | Inf  | 0.3  | 4.3    |
| HU52899 | 46.0 | adults                 | 1.45 | Inf  | 6.9  | 712.5  |
| HU08501 | 4.8  | schoolchildren         | 1.51 | Inf  | 14.3 | 553.8  |
| HU07701 | 4.2  | schoolchildren         | 1.51 | Inf  | 0.7  | 151.8  |
| HU06401 | 9.3  | schoolchildren         | 1.54 | Inf  | 1.8  | 211.9  |
| HU00801 | 1.1  | under-fours            | 1.54 | Inf  | 0.8  | 40.9   |
| HU07601 | 7.3  | schoolchildren         | 1.58 | Inf  | 4.2  | 122.1  |
| HU00301 | 1.2  | under-fours            | 1.58 | Inf  | 0.3  | 93.9   |
| HU06601 | 6.4  | schoolchildren         | 1.58 | Inf  | 0.7  | 83.5   |
| HU51699 | 58.5 | (pre-) elderly         | 1.58 | Inf  | 4.2  | 53.9   |
| HU05801 | 7.3  | schoolchildren         | 1.58 | Inf  | 0.8  | 2.6    |
| CI72199 | 1.2  | under-fours            | 1.61 | Vacc | 11.0 | 698.0  |
| HU54399 | 5.0  | schoolchildren         | 1.61 | Inf  | 2.6  | 50.2   |
| HU06101 | 8.2  | choolchildren_ non vac | 1.61 | Inf  | 8.6  | 43.8   |
| HU07401 | 4.8  | schoolchildren         | 1.61 | Inf  | 1.1  | 12.2   |
| HU51599 | 30.0 | adults                 | 1.64 | Inf  | 2.8  | 38.2   |
| HU07801 | 4.7  | choolchildren_ non vac | 1.71 | Inf  | 2.5  | 28.2   |
| SP51999 | 10.3 | schoolchildren         | 1.74 | Inf  | 1.0  | 117.1  |
| HU53699 | 1.1  | under-fours            | 1.77 | Inf  | 1.1  | 101.2  |
| HU22461 | 48.0 | adults                 | 1.81 | inf  | 30.1 | 1398.3 |
| HU06901 | 8.4  | schoolchildren         | 1.81 | Inf  | 23.4 | 544.3  |
| HU08001 | 8.3  | schoolchildren         | 1.81 | Inf  | 3.1  | 272.9  |
| HU51899 | 19.2 | adolescents            | 1.81 | Inf  | 6.2  | 152.5  |
| HU51399 | 48.3 | adults                 | 1.81 | Inf  | 7.5  | 106.1  |
| GH07901 | 7.3  | schoolchildren         | 1.84 | Inf  | 7.4  | 115.9  |
| HU07201 | 8.4  | schoolchildren         | 1.87 | Inf  | 2.6  | 493.1  |
| HU07301 | 7.5  | schoolchildren         | 1.91 | Inf  | 4.7  | 94.6   |
| HU54099 | 9.1  | schoolchildren         | 1.94 | Inf  | 13.1 | 1185.3 |
| HU07101 | 7.6  | schoolchildren         | 1.97 | Inf  | 7.0  | 84.8   |
| SP52399 | 13.7 | adolescents            | 2.00 | Inf  | 2.2  | 27.0   |
| GH50399 | 0.8  | under-fours            | 2.04 | Inf  | 0.1  | 10.4   |
| HU08201 | 9.7  | schoolchildren         | 2.07 | Inf  | 22.4 | 125.6  |
| HU05901 | 8.2  | schoolchildren         | 2.07 | Inf  | 8.3  | 84.9   |
| HU52499 | 28.3 | adults                 | 2.10 | Inf  | 3.5  | 18.5   |
| CI54499 | 0.9  | under-fours            | 2.14 | Inf  | 0.1  | 5.4    |
| HU52799 | 16.8 | adolescents            | 2.17 | Inf  | 2.9  | 189.9  |
| HU52299 | 53.6 | adults                 | 2.30 | Inf  | 73.5 | 130.0  |
| HU54199 | 10.4 | schoolchildren         | 2.43 | Inf  | 7.8  | 240.8  |
| HU54299 | 8.0  | schoolchildren         | 2.43 | Inf  | 4.6  | 142.8  |
| HU54999 | 10.2 | schoolchildren         | 2.66 | Inf  | 6.0  | 559.2  |
| HU52599 | 3.6  | under-fours            | 2.66 | Inf  | 4.5  | 128.2  |
| HU54899 | 10.2 | schoolchildren         | 2.66 | Inf  | 0.3  | 58.2   |
| HU52699 | 9.7  | schoolchildren         | 2.66 | Inf  | 3.2  | 51.4   |
| CI54799 | 0.7  | under-fours            | 2.79 | Inf  | 0.2  | 5.8    |
| CI58099 | 4.2  | schoolchildren         | 2.99 | Vacc | 0.1  | 120.5  |
| HU71999 | 4.9  | schoolchildren         | 3.15 | Inf  | 1.2  | 111.5  |
| HU50599 | 11.0 | adolescents            | 3.32 | Inf  | 11.4 | 142.2  |
| CI54599 | 0.7  | under-fours            | 3.52 | Vacc | 0.9  | 143.1  |
| HU50699 | 40.4 | adults                 | 3.81 | Inf  | 2.4  | 201.3  |

|         |      |                       |       |      |      |       |
|---------|------|-----------------------|-------|------|------|-------|
| HU54699 | 3.3  | under-fours           | 3.94  | Inf  | 0.8  | 57.0  |
| CI53999 | 0.7  | under-fours           | 3.98  | Vacc | 8.8  | 427.4 |
| HU50099 | 15.0 | adolescents           | 4.07  | Inf  | 0.5  | 13.1  |
| HU51799 | 65.3 | (pre-) elderly        | 4.11  | Inf  | 75.6 | 336.3 |
| HU51099 | 4.1  | schoolchildren        | 4.17  | Vacc | 1.0  | 49.0  |
| HU53899 | 56.6 | adults                | 4.86  | Inf  | 4.5  | 41.9  |
| HU50999 | 72.9 | (pre-) elderly        | 5.62  | Inf  | 4.9  | 35.9  |
| GH50199 | 42.9 | adults                | 6.01  | Inf  | 4.8  | 156.4 |
| HU71899 | 4.3  | schoolchildren        | 6.51  | Inf  | 4.7  | 80.7  |
| CI56799 | 1.6  | under-fours           | 6.60  | Vacc | 0.2  | 40.8  |
| CI72299 | 0.8  | under-fours_ non vacc | 6.80  | Inf  | 0.6  | 45.4  |
| HU50799 | 13.0 | adolescents           | 7.95  | Inf  | 3.7  | 34.3  |
| HU50499 | 37.2 | adults                | 8.02  | Inf  | 4.8  | 16.3  |
| CI56599 | 2.0  | under-fours           | 11.01 | Vacc | 1.6  | 100.1 |
| HU55699 | 65.4 | (pre-) elderly        | 12.48 | Inf  | 35.5 | 139.0 |
| CI57599 | 2.0  | under-fours           | 13.24 | Inf  | 0.3  | 4.2   |
| HU22702 | 82.2 | (pre-) elderly        | 13.54 | Inf  | 21.1 | 66.2  |
| HU22602 | 83.4 | (pre-) elderly        | 13.80 | Inf  | 12.1 | 49.6  |
| HU22302 | 59.5 | adults                | 14.55 | Inf  | 4.4  | 121.5 |
| CI57499 | 2.3  | under-fours           | 15.64 | Inf  | 0.2  | 18.2  |
| HU56299 | 38.9 | adults                | 15.84 | Inf  | 8.0  | 217.3 |
| GH55399 | 16.5 | adolescents           | 16.00 | Inf  | 1.3  | 13.6  |
| HU56399 | 11.7 | adolescents           | 16.43 | Inf  | 3.8  | 198.2 |
| CI70999 | 5.4  | schoolchildren        | 18.10 | Vacc | 0.5  | 32.0  |
| CI57399 | 2.5  | under-fours           | 18.92 | Vacc | 0.1  | 4.7   |
| CI57199 | 2.6  | under-fours           | 19.38 | Vacc | 0.1  | 4.3   |
| CI63699 | 5.7  | schoolchildren        | 19.65 | Vacc | 10.7 | 312.1 |
| CI63799 | 5.5  | schoolchildren        | 19.81 | Vacc | 25.8 | 281.9 |
| CI71399 | 5.6  | schoolchildren        | 20.76 | Vacc | 0.4  | 20.3  |
| CI56999 | 3.2  | under-fours           | 24.05 | Vacc | 1.4  | 101.0 |
| CI56899 | 3.0  | under-fours_ non vacc | 25.17 | Inf  | 0.3  | 5.8   |
| CI56699 | 3.1  | under-fours           | 25.56 | Vacc | 0.2  | 8.4   |
| CI64299 | 6.0  | schoolchildren        | 25.79 | Vacc | 2.6  | 98.2  |
| HU56199 | 11.3 | adolescents           | 26.32 | Inf  | 2.3  | 45.4  |
| CI64799 | 6.4  | schoolchildren        | 28.42 | Vacc | 2.6  | 63.7  |
| CI70399 | 6.4  | schoolchildren        | 28.62 | Vacc | 0.7  | 45.0  |
| CI71499 | 6.3  | schoolchildren        | 29.24 | Vacc | 1.8  | 59.8  |
| CI71099 | 3.4  | under-fours           | 29.37 | Vacc | 1.4  | 10.3  |
| GH62499 | 6.7  | schoolchildren        | 29.50 | Vacc | 0.1  | 0.1   |
| CI57999 | 3.6  | under-fours           | 30.16 | Inf  | 0.4  | 5.6   |
| CI58299 | 3.5  | under-fours           | 30.23 | Vacc | 0.1  | 6.2   |
| CI57099 | 3.6  | under-fours           | 30.46 | Inf  | 0.1  | 7.5   |
| CI71599 | 6.4  | schoolchildren        | 32.20 | Vacc | 2.5  | 1.1   |
| HU06802 | 12.0 | schoolchildren        | 32.56 | Inf  | 0.7  | 26.7  |
| HU55299 | 61.7 | (pre-) elderly        | 32.69 | Inf  | 4.0  | 40.9  |
| CI70199 | 6.7  | schoolchildren        | 32.82 | Vacc | 0.6  | 26.6  |
| HU16502 | 43.4 | adults                | 33.18 | Inf  | 2.3  | 15.5  |
| HU22102 | 69.3 | (pre-) elderly        | 34.27 | Inf  | 13.2 | 22.0  |
| CI58199 | 3.9  | under-fours           | 34.46 | Vacc | 2.3  | 33.2  |
| CI65099 | 7.0  | schoolchildren        | 34.89 | Vacc | 1.5  | 39.9  |
| HU05702 | 12.9 | schoolchildren        | 35.09 | Inf  | 7.5  | 55.2  |
| HU11502 | 15.4 | adolescents           | 35.42 | Inf  | 0.1  | 11.4  |
| HU10802 | 15.2 | adolescents           | 35.48 | Inf  | 3.6  | 98.4  |
| GH16202 | 29.8 | adults                | 35.61 | Inf  | 0.6  | 14.8  |
| CI72099 | 6.9  | schoolchildren        | 35.75 | Vacc | 4.6  | 66.8  |
| HU20502 | 72.2 | (pre-) elderly        | 35.84 | Inf  | 2.4  | 5.6   |

|         |      |                        |       |      |      |       |
|---------|------|------------------------|-------|------|------|-------|
| HU55899 | 48.2 | adults                 | 35.91 | Inf  | 0.2  | 5.5   |
| HU16702 | 25.3 | adults                 | 36.34 | Inf  | 1.0  | 5.7   |
| HU06502 | 10.1 | schoolchildren         | 36.44 | Inf  | 1.2  | 40.4  |
| HU57699 | 42.0 | adults                 | 36.70 | Inf  | 5.0  | 80.2  |
| HU61799 | 7.7  | schoolchildren         | 36.86 | Vacc | 14.6 | 517.4 |
| HU11402 | 14.1 | adolescents            | 36.99 | Inf  | 0.9  | 21.3  |
| HU06902 | 11.3 | schoolchildren         | 37.03 | Inf  | 1.1  | 38.3  |
| HU55999 | 13.5 | adolescents            | 37.06 | Inf  | 0.4  | 12.5  |
| CI57799 | 3.6  | under-fours_ non vacc  | 37.68 | Inf  | 1.1  | 74.6  |
| HU05802 | 10.4 | schoolchildren         | 39.03 | Inf  | 0.4  | 1.5   |
| HU21702 | 65.6 | (pre-) elderly         | 39.16 | Inf  | 6.5  | 17.6  |
| HU21770 | 67.1 | (pre-) elderly         | 39.16 | inf  | 1.9  | 14.3  |
| HU05502 | 10.2 | schoolchildren         | 39.56 | Inf  | 2.1  | 12.4  |
| HU05902 | 11.4 | schoolchildren         | 39.59 | Inf  | 2.0  | 11.3  |
| HU56099 | 37.8 | adults                 | 39.75 | Inf  | 2.6  | 55.2  |
| HU11802 | 15.2 | adolescents            | 39.95 | Inf  | 0.7  | 7.1   |
| HU21202 | 69.9 | (pre-) elderly         | 40.21 | Inf  | 5.1  | 18.4  |
| HU21902 | 76.0 | (pre-) elderly         | 40.44 | Inf  | 2.6  | 9.4   |
| GH55199 | 12.0 | adolescents            | 40.74 | Inf  | 1.7  | 9.6   |
| CI70499 | 7.1  | schoolchildren         | 41.04 | Vacc | 4.9  | 98.3  |
| HU15870 | 54.8 | adults                 | 42.02 | inf  | 9.2  | 40.7  |
| HU15802 | 57.9 | adults                 | 42.02 | Inf  | 6.1  | 10.3  |
| CI70599 | 7.7  | schoolchildren         | 42.28 | Vacc | 1.4  | 49.6  |
| GH55599 | 15.9 | adolescents            | 42.32 | Inf  | 1.4  | 18.9  |
| HU21002 | 69.5 | (pre-) elderly         | 42.35 | Inf  | 54.6 | 34.2  |
| HU15302 | 26.5 | adults                 | 42.81 | Inf  | 1.0  | 4.0   |
| HU16902 | 56.0 | adults                 | 43.11 | Inf  | 2.9  | 34.1  |
| HU10902 | 16.0 | adolescents            | 43.37 | Inf  | 2.0  | 5.6   |
| HU20602 | 67.1 | (pre-) elderly         | 44.45 | Inf  | 11.7 | 61.4  |
| HU21102 | 65.6 | (pre-) elderly         | 45.24 | Inf  | 5.1  | 311.3 |
| HU16402 | 21.9 | adults                 | 45.37 | Inf  | 3.4  | 42.9  |
| HU20302 | 63.6 | (pre-) elderly         | 46.46 | Inf  | 6.1  | 142.2 |
| HU20702 | 62.0 | (pre-) elderly         | 46.72 | Inf  | 25.6 | 25.1  |
| HU16002 | 55.5 | adults                 | 46.88 | Inf  | 5.0  | 48.0  |
| CI64899 | 8.3  | schoolchildren         | 46.95 | Vacc | 0.9  | 99.5  |
| HU15902 | 52.6 | adults                 | 46.95 | Inf  | 6.2  | 23.7  |
| CI71799 | 7.9  | schoolchildren         | 47.84 | Vacc | 2.7  | 9.6   |
| HU16102 | 53.2 | adults                 | 48.33 | Inf  | 47.3 | 25.2  |
| SP16302 | 56.8 | adults                 | 48.40 | Inf  | 7.1  | 33.9  |
| CI64499 | 7.9  | schoolchildren         | 48.53 | Vacc | 0.4  | 39.9  |
| CI64199 | 8.0  | schoolchildren         | 50.30 | Vacc | 1.4  | 24.5  |
| HU11302 | 15.6 | adolescents            | 50.33 | Inf  | 0.3  | 3.6   |
| CI71199 | 8.1  | schoolchildren         | 51.55 | Vacc | 0.4  | 19.2  |
| HU15502 | 53.9 | adults                 | 51.88 | Inf  | 3.1  | 31.0  |
| CI72399 | 8.1  | schoolchildren         | 52.21 | Vacc | 0.5  | 18.8  |
| CI64099 | 5.7  | schoolchildren         | 54.93 | Vacc | 4.7  | 60.9  |
| HU20102 | 68.9 | (pre-) elderly         | 55.98 | Inf  | 4.4  | 51.2  |
| GH62399 | 8.6  | schoolchildren         | 56.71 | Vacc | 0.2  | 36.9  |
| HU15202 | 23.6 | adults                 | 56.90 | Inf  | 0.8  | 11.1  |
| HU63499 | 42.7 | adults                 | 57.46 | Inf  | 5.5  | 0.9   |
| CI64599 | 8.8  | schoolchildren         | 59.57 | Vacc | 2.0  | 51.2  |
| CI64699 | 9.5  | schoolchildren         | 59.63 | Vacc | 5.6  | 235.1 |
| HU63399 | 9.0  | schoolchildren         | 60.65 | Vacc | 0.3  | 11.1  |
| HU61899 | 64.8 | (pre-) elderly         | 61.87 | Inf  | 5.0  | 7.8   |
| CI63999 | 5.5  | choolchildren_ non vac | 62.56 | Inf  | 3.5  | 74.1  |
| GH60599 | 9.8  | schoolchildren         | 67.12 | Vacc | 1.7  | 57.2  |

|         |      |                        |        |      |      |       |
|---------|------|------------------------|--------|------|------|-------|
| CI70699 | 9.5  | schoolchildren         | 67.68  | Vacc | 0.7  | 21.0  |
| CI70799 | 9.9  | schoolchildren         | 70.87  | Vacc | 6.9  | 67.4  |
| GH60199 | 9.4  | schoolchildren         | 73.17  | Vacc | 1.4  | 52.8  |
| CI64999 | 10.1 | schoolchildren         | 74.68  | Vacc | 2.0  | 19.3  |
| GH62299 | 15.8 | adolescents            | 74.78  | Inf  | 1.4  | 27.4  |
| HU61599 | 45.9 | adults                 | 75.47  | Inf  | 3.1  | 203.9 |
| GH62999 | 10.3 | schoolchildren         | 75.83  | Vacc | 1.0  | 17.3  |
| CI70899 | 10.0 | schoolchildren         | 76.22  | Vacc | 2.5  | 26.5  |
| GH60399 | 11.1 | adolescents            | 77.83  | Inf  | 1.7  | 15.5  |
| GH62599 | 11.6 | adolescents            | 78.16  | Inf  | 0.5  | 9.3   |
| GH63099 | 14.2 | adolescents            | 78.23  | Inf  | 1.7  | 5.4   |
| GH63199 | 15.4 | adolescents            | 78.23  | Inf  | 2.1  | 1.1   |
| GH62899 | 12.3 | adolescents            | 78.23  | Inf  | 0.4  | 0.2   |
| HU63299 | 11.5 | adolescents            | 78.82  | Inf  | 0.3  | 0.5   |
| GH60299 | 16.5 | adolescents            | 78.92  | Inf  | 1.5  | 4.3   |
| CI71299 | 7.0  | schoolchildren         | 81.41  | Inf  | 0.2  | 10.8  |
| CI66599 | 11.2 | schoolchildren         | 83.02  | Vacc | 4.1  | 14.0  |
| GH62699 | 13.6 | adolescents            | 83.09  | Inf  | 2.8  | 60.0  |
| CI66799 | 10.7 | schoolchildren         | 83.25  | Vacc | 1.8  | 21.5  |
| CI66999 | 11.2 | schoolchildren         | 85.09  | Vacc | 2.3  | 67.6  |
| HU61399 | 15.9 | adolescents            | 86.84  | Inf  | 1.5  | 2.3   |
| GH61699 | 15.5 | adolescents            | 88.28  | Inf  | 2.8  | 30.8  |
| CI67299 | 11.5 | adolescents            | 90.22  | Vacc | 1.3  | 30.8  |
| CI66699 | 11.7 | schoolchildren         | 92.03  | Vacc | 2.5  | 56.9  |
| CI67499 | 12.1 | schoolchildren         | 92.88  | Vacc | 0.3  | 73.1  |
| CI67199 | 11.8 | schoolchildren         | 95.64  | Vacc | 0.7  | 34.2  |
| GH61199 | 14.6 | adolescents            | 98.93  | Inf  | 1.3  | 29.2  |
| GH60799 | 12.2 | adolescents            | 99.29  | Inf  | 1.4  | 35.1  |
| GH60699 | 14.2 | adolescents            | 99.29  | Inf  | 0.9  | 1.6   |
| GH61499 | 15.3 | adolescents            | 100.44 | Inf  | 1.2  | 10.3  |
| CI67599 | 12.1 | schoolchildren         | 104.64 | Vacc | 0.4  | 73.7  |
| GH61099 | 17.1 | adolescents            | 107.30 | Inf  | 0.5  | 0.5   |
| CI70299 | 9.1  | choolchildren_ non vac | 108.16 | Inf  | 1.2  | 10.1  |
| GH62099 | 13.1 | choolchildren_ non vac | 108.55 | Inf  | 1.3  | 16.7  |
| GH61999 | 11.9 | choolchildren_ non vac | 108.55 | Inf  | 0.6  | 5.9   |
| GH60499 | 12.2 | adolescents            | 111.38 | Inf  | 1.2  | 2.0   |
| GH63599 | 15.6 | adolescents            | 111.77 | Inf  | 0.4  | 1.6   |
| GH65299 | 11.0 | adolescents            | 119.13 | Vacc | 2.9  | 59.2  |
| GH61299 | 11.5 | adolescents            | 121.56 | Inf  | 2.1  | 8.2   |
| CI67099 | 11.3 | choolchildren_ non vac | 122.84 | Inf  | 1.4  | 79.1  |
| GH65399 | 52.8 | adults                 | 134.77 | Inf  | 25.4 | 5.5   |
| GH65499 | 18.0 | adolescents            | 134.97 | Inf  | 1.2  | 8.7   |
| CI67399 | 11.6 | choolchildren_ non vac | 135.00 | Inf  | 3.9  | 77.3  |
| CI66899 | 12.3 | adolescents            | 135.26 | Vacc | 1.8  | 6.9   |
| GH65799 | 17.2 | adolescents            | 135.82 | Inf  | 1.2  | 44.2  |
| GH65699 | 16.5 | adolescents            | 137.76 | Inf  | 0.4  | 5.0   |
| GH66099 | 16.2 | adolescents            | 150.77 | Inf  | 0.4  | 21.4  |
| GH66199 | 14.1 | adolescents            | 150.77 | Inf  | 0.1  | 4.3   |
| GH66499 | 17.9 | adolescents            | 152.84 | Inf  | 0.8  | 1.9   |
| CI66399 | 14.0 | adolescents            | 154.55 | Vacc | 1.8  | 14.8  |
| CI66299 | 14.0 | adolescents            | 154.55 | Vacc | 1.2  | 8.6   |
| GH65899 | 17.3 | adolescents            | 173.60 | Inf  | 1.9  | 12.4  |
| GH65599 | 26.2 | adults                 | 181.95 | Inf  | 2.2  | 3.6   |
| GH65999 | 18.7 | adolescents_ non vacc  | 191.54 | Inf  | 3.4  | 26.4  |

**PIENTER-2 data : Random Survey of Dutch population without oversampling**

n= 5740 (2608 =male, 3132=female)

| SampleCode | Age (yrs) | IgG-Ptx<br>(EU/ml) |
|------------|-----------|--------------------|
| 13600002   | 47.6      | 88.6               |
| 13600007   | 74.3      | 150.1              |
| 13600008   | 74.3      | 29.9               |
| 13600011   | 49.3      | 2.4                |
| 13600013   | 0.9       | 3.7                |
| 13600014   | 29.4      | 5.7                |
| 13600015   | 10.4      | 1                  |
| 13600016   | 6.1       | 1.4                |
| 13600019   | 6.6       | 2.7                |
| 13600020   | 11.3      | 80.6               |
| 13600021   | 0.9       | 447.9              |
| 13600022   | 12.3      | 18.3               |
| 13600024   | 6.3       | 7.8                |
| 13600031   | 14.7      | 36.1               |
| 13600033   | 16.2      | 3.7                |
| 13600035   | 9.7       | 18                 |
| 13600039   | 8.6       | 1                  |
| 13600041   | 9.5       | 1                  |
| 13600049   | 51.7      | 6.2                |
| 13600050   | 58.9      | 50.7               |
| 13600056   | 45.9      | 1                  |
| 13600057   | 59.9      | 13                 |
| 13600058   | 4.9       | 1.7                |
| 13600062   | 45.9      | 218.2              |
| 13600066   | 41.1      | 15.3               |
| 13600069   | 13.1      | 1                  |
| 13600071   | 46.5      | 40.4               |
| 13600073   | 43.3      | 1.9                |
| 13600074   | 56.3      | 77.2               |
| 13600076   | 77.2      | 16.6               |
| 13600079   | 75.1      | 27.7               |
| 13600085   | 71.6      | 12.8               |
| 13600088   | 69.5      | 6.2                |
| 13600094   | 18.0      | 1                  |
| 13600096   | 71.7      | 18.1               |
| 13600099   | 66.3      | 10.1               |
| 13600101   | 65.1      | 33.6               |
| 13600103   | 65.9      | 23.6               |
| 13600104   | 61.9      | 14                 |
| 13600105   | 63.4      | 3.8                |
| 13600106   | 17.4      | 1                  |
| 13600107   | 64.4      | 15.6               |
| 13600109   | 62.3      | 1                  |
| 13600110   | 63.7      | 19.2               |
| 13600113   | 56.2      | 10.4               |
| 13600117   | 60.9      | 3.7                |
| 13600119   | 59.7      | 14                 |
| 13600120   | 28.7      | 93.6               |
| 13600122   | 53.6      | 89.7               |
| 13600124   | 53.5      | 1                  |
| 13600127   | 4.6       | 1.4                |
| 13600128   | 3.6       | 37.6               |
| 13600129   | 22.6      | 3.4                |



|          |      |       |
|----------|------|-------|
| 13600130 | 39.0 | 4.3   |
| 13600135 | 29.0 | 7.4   |
| 13600136 | 14.6 | 7     |
| 13600137 | 72.3 | 7.2   |
| 13600138 | 78.9 | 10.8  |
| 13600139 | 0.5  | 11.8  |
| 13600140 | 75.6 | 10    |
| 13600141 | 3.1  | 1.3   |
| 13600144 | 65.7 | 4.9   |
| 13600146 | 17.3 | 21.9  |
| 13600147 | 61.4 | 6.1   |
| 13600148 | 15.3 | 1     |
| 13600151 | 28.0 | 2.5   |
| 13600154 | 47.9 | 56.2  |
| 13600157 | 1.6  | 3.5   |
| 13600159 | 0.5  | 65.9  |
| 13600161 | 0.9  | 14.5  |
| 13600165 | 48.4 | 3.5   |
| 13600166 | 24.4 | 139.2 |
| 13600168 | 0.4  | 288.3 |
| 13600169 | 5.6  | 5.9   |
| 13600171 | 11.1 | 6.5   |
| 13600173 | 6.5  | 2.6   |
| 13600174 | 9.8  | 7.8   |
| 13600178 | 37.1 | 1     |
| 13600179 | 14.0 | 21.7  |
| 13600185 | 65.0 | 11.1  |
| 13600187 | 39.1 | 19.8  |
| 13600188 | 9.5  | 1     |
| 13600195 | 26.3 | 14    |
| 13600198 | 2.6  | 1.5   |
| 13600199 | 40.8 | 9.6   |
| 13600200 | 1.4  | 26.1  |
| 13600201 | 44.6 | 12.2  |
| 13600202 | 27.7 | 15    |
| 13600203 | 58.5 | 20.4  |
| 13600206 | 51.8 | 20.3  |
| 13600207 | 49.4 | 31.3  |
| 13600208 | 49.7 | 1.4   |
| 13600209 | 56.6 | 57.5  |
| 13600211 | 32.2 | 5.8   |
| 13600213 | 70.6 | 9.5   |
| 13600218 | 34.9 | 1.6   |
| 13600223 | 43.4 | 8     |
| 13600224 | 69.7 | 1.5   |
| 13600225 | 19.2 | 10.6  |
| 13600226 | 36.7 | 34.5  |
| 13600229 | 12.6 | 1.9   |
| 13600232 | 11.1 | 2.6   |
| 13600234 | 8.8  | 6.8   |
| 13600240 | 0.5  | 80.9  |
| 13600244 | 34.8 | 20.5  |
| 13600246 | 3.6  | 1     |
| 13600248 | 45.8 | 7.6   |
| 13600249 | 9.1  | 1     |
| 13600253 | 40.7 | 37.3  |
| 13600255 | 50.6 | 26.4  |



|          |      |       |
|----------|------|-------|
| 13600258 | 3.4  | 1.3   |
| 13600262 | 79.0 | 23.6  |
| 13600264 | 77.7 | 3.7   |
| 13600265 | 77.0 | 1     |
| 13600266 | 0.5  | 1     |
| 13600267 | 2.9  | 1     |
| 13600268 | 0.7  | 20    |
| 13600269 | 0.8  | 58.6  |
| 13600271 | 72.2 | 126.6 |
| 13600272 | 70.0 | 6.2   |
| 13600274 | 69.1 | 8.7   |
| 13600275 | 72.7 | 41.4  |
| 13600278 | 71.0 | 39    |
| 13600282 | 68.2 | 16.3  |
| 13600283 | 66.6 | 10.4  |
| 13600284 | 66.8 | 53.3  |
| 13600287 | 15.4 | 170.7 |
| 13600288 | 65.7 | 119   |
| 13600289 | 64.8 | 1     |
| 13600296 | 45.9 | 12.7  |
| 13600306 | 63.9 | 2     |
| 13600316 | 4.3  | 2.7   |
| 13600323 | 65.9 | 3.6   |
| 13600327 | 39.0 | 6     |
| 13600328 | 43.6 | 5.5   |
| 13600331 | 5.0  | 7.9   |
| 13600333 | 9.4  | 16.7  |
| 13600335 | 21.0 | 6.8   |
| 13600336 | 3.3  | 1     |
| 13600337 | 3.3  | 1     |
| 13600339 | 73.9 | 2.6   |
| 13600341 | 58.7 | 17.5  |
| 13600342 | 11.1 | 1.8   |
| 13600344 | 0.6  | 33.5  |
| 13600346 | 52.2 | 46.7  |
| 13600348 | 5.5  | 1     |
| 13600355 | 0.9  | 7.2   |
| 13600357 | 4.4  | 2.3   |
| 13600359 | 13.4 | 2.1   |
| 13600360 | 40.9 | 1.4   |
| 13600361 | 9.7  | 101.2 |
| 13600362 | 13.1 | 14.4  |
| 13600363 | 38.8 | 59.7  |
| 13600364 | 17.0 | 2.4   |
| 13600366 | 43.2 | 14    |
| 13600369 | 29.3 | 14    |
| 13600372 | 33.1 | 92.3  |
| 13600373 | 22.3 | 5.7   |
| 13600374 | 54.5 | 7     |
| 13600375 | 54.7 | 32.9  |
| 13600377 | 6.5  | 23.3  |
| 13600378 | 24.1 | 34.9  |
| 13600379 | 44.1 | 16.8  |
| 13600380 | 46.9 | 17    |
| 13600436 | 17.7 | 1     |
| 13600439 | 48.0 | 29.7  |
| 13600440 | 12.2 | 1.1   |

|          |      |       |
|----------|------|-------|
| 13600441 | 49.2 | 1     |
| 13600443 | 15.5 | 26.3  |
| 13600444 | 30.3 | 19.7  |
| 13600445 | 57.6 | 9.9   |
| 13600447 | 23.0 | 2.2   |
| 13600450 | 34.1 | 11.1  |
| 13600451 | 60.1 | 5.5   |
| 13600454 | 64.3 | 29.8  |
| 13600456 | 63.8 | 7.3   |
| 13600458 | 71.2 | 14    |
| 13600462 | 2.7  | 13.6  |
| 13600466 | 33.7 | 152.3 |
| 13600467 | 23.9 | 18.3  |
| 13600468 | 67.7 | 66.2  |
| 13600469 | 17.4 | 21.1  |
| 13600473 | 39.8 | 6.3   |
| 13600477 | 58.6 | 33.9  |
| 13600478 | 33.7 | 8.3   |
| 13600483 | 43.2 | 17.6  |
| 13600488 | 66.7 | 3.6   |
| 13600493 | 0.5  | 43.9  |
| 13600495 | 16.6 | 6.1   |
| 13600497 | 33.3 | 7.7   |
| 13600498 | 3.0  | 1     |
| 13600503 | 79.6 | 91.3  |
| 13600504 | 76.1 | 1.5   |
| 13600505 | 77.9 | 4     |
| 13600506 | 0.4  | 92.4  |
| 13600507 | 76.4 | 33.2  |
| 13600508 | 75.9 | 16.7  |
| 13600509 | 3.4  | 1.7   |
| 13600510 | 3.4  | 1.3   |
| 13600515 | 64.7 | 42.1  |
| 13600517 | 60.3 | 2.5   |
| 13600518 | 61.7 | 5.3   |
| 13600521 | 63.4 | 4     |
| 13600527 | 71.6 | 34.7  |
| 13600528 | 68.8 | 8.7   |
| 13600530 | 7.8  | 24.9  |
| 13600533 | 65.8 | 4.5   |
| 13600535 | 16.2 | 6.1   |
| 13600537 | 13.5 | 18.3  |
| 13600542 | 36.5 | 11.9  |
| 13600543 | 57.9 | 11.4  |
| 13600549 | 47.9 | 7.8   |
| 13600550 | 20.4 | 30.4  |
| 13600551 | 0.8  | 2.8   |
| 13600559 | 73.2 | 1     |
| 13600560 | 1.0  | 10.8  |
| 13600604 | 53.6 | 3     |
| 13600606 | 11.5 | 1     |
| 13600607 | 55.9 | 44.8  |
| 13600608 | 0.3  | 1.9   |
| 13600616 | 43.2 | 9.4   |
| 13600618 | 32.8 | 1.2   |
| 13600619 | 7.0  | 17.4  |
| 13600620 | 40.9 | 5.2   |

|          |      |        |
|----------|------|--------|
| 13600623 | 48.1 | 11.3   |
| 13600624 | 78.1 | 10.5   |
| 13600625 | 27.5 | 6.4    |
| 13600627 | 42.6 | 4.1    |
| 13600629 | 73.3 | 20.6   |
| 13600630 | 71.1 | 70.2   |
| 13600631 | 64.2 | 158.5  |
| 13600632 | 67.9 | 13.8   |
| 13600633 | 60.6 | 51     |
| 13600634 | 69.5 | 2.6    |
| 13600677 | 68.8 | 13.2   |
| 13600678 | 68.1 | 15.6   |
| 13600679 | 70.4 | 1.2    |
| 13600683 | 3.1  | 1      |
| 13600686 | 72.1 | 45     |
| 13600690 | 0.2  | 1      |
| 13600692 | 57.0 | 14.4   |
| 13600693 | 2.8  | 11.1   |
| 13600694 | 75.4 | 12.1   |
| 13600697 | 70.1 | 23.5   |
| 13600698 | 70.4 | 30.1   |
| 13600699 | 2.2  | 5.2    |
| 13600700 | 4.0  | 188.4  |
| 13600701 | 61.7 | 8.3    |
| 13600706 | 60.9 | 16.9   |
| 13600709 | 1.1  | 195.8  |
| 13600712 | 13.1 | 205.3  |
| 13600719 | 66.9 | 49.3   |
| 13600721 | 65.6 | 1474.4 |
| 13600723 | 23.6 | 3.4    |
| 13600724 | 58.4 | 1      |
| 13600725 | 50.3 | 61.5   |
| 13600727 | 23.8 | 2.4    |
| 13600728 | 43.1 | 5.7    |
| 13600750 | 63.9 | 9.3    |
| 13600751 | 2.6  | 2.2    |
| 13600754 | 11.5 | 2.1    |
| 13600756 | 12.1 | 8.3    |
| 13600760 | 12.8 | 1      |
| 13600762 | 5.8  | 94.7   |
| 13600764 | 11.5 | 14.7   |
| 13600765 | 15.7 | 2.5    |
| 13600766 | 11.7 | 1.1    |
| 13600769 | 12.0 | 1      |
| 13600771 | 15.7 | 1.1    |
| 13600779 | 16.6 | 18.9   |
| 13600782 | 45.6 | 42.7   |
| 13600787 | 20.2 | 33.9   |
| 13600788 | 57.7 | 315.3  |
| 13600789 | 7.1  | 1      |
| 13600790 | 77.5 | 16.2   |
| 13600792 | 2.1  | 1.9    |
| 13600795 | 2.7  | 1      |
| 13600797 | 75.1 | 98.8   |
| 13600800 | 37.9 | 1      |
| 13600801 | 33.9 | 4.3    |
| 13600804 | 17.1 | 5.4    |

|          |      |       |
|----------|------|-------|
| 13600805 | 63.4 | 136.5 |
| 13600806 | 65.6 | 4.9   |
| 13600811 | 76.1 | 18.6  |
| 13600812 | 55.4 | 15    |
| 13600815 | 2.7  | 1     |
| 13600816 | 71.7 | 22.6  |
| 13600817 | 3.4  | 60.4  |
| 13600818 | 71.9 | 35    |
| 13600820 | 67.8 | 103.8 |
| 13600823 | 65.5 | 173.3 |
| 13600824 | 62.5 | 18.2  |
| 13600825 | 61.5 | 16    |
| 13600826 | 1.6  | 31.2  |
| 13600828 | 48.3 | 27.9  |
| 13600829 | 15.4 | 6.4   |
| 13600831 | 60.5 | 20.6  |
| 13600836 | 78.2 | 6.6   |
| 13600838 | 20.8 | 38.5  |
| 13600842 | 16.2 | 2.8   |
| 13600844 | 45.5 | 8.6   |
| 13600845 | 33.8 | 28.1  |
| 13600846 | 46.3 | 3.2   |
| 13600847 | 56.8 | 45.4  |
| 13600851 | 26.4 | 7.1   |
| 13600852 | 46.5 | 45.2  |
| 13600855 | 61.1 | 11.7  |
| 13600856 | 1.1  | 45.7  |
| 13600861 | 43.6 | 35    |
| 13600864 | 61.1 | 13.4  |
| 13600865 | 3.0  | 1     |
| 13600866 | 0.4  | 116.9 |
| 13600867 | 53.2 | 27.8  |
| 13600869 | 28.5 | 42.3  |
| 13600874 | 57.0 | 35.3  |
| 13600876 | 47.8 | 32.5  |
| 13600877 | 21.4 | 22.6  |
| 13600882 | 0.9  | 23.3  |
| 13600885 | 10.5 | 31.4  |
| 13600886 | 56.0 | 7.2   |
| 13600888 | 2.6  | 1     |
| 13600893 | 11.5 | 38.7  |
| 13600894 | 15.2 | 69.3  |
| 13600895 | 13.4 | 28.9  |
| 13600897 | 8.4  | 184.1 |
| 13600898 | 14.0 | 1     |
| 13600899 | 0.8  | 23.3  |
| 13600901 | 8.5  | 8.4   |
| 13600903 | 1.6  | 1.5   |
| 13600905 | 6.7  | 53    |
| 13600907 | 7.1  | 3     |
| 13600908 | 13.5 | 3.5   |
| 13600911 | 7.8  | 1.9   |
| 13600912 | 52.8 | 13.1  |
| 13600914 | 52.8 | 34.7  |
| 13600919 | 45.5 | 31.1  |
| 13600923 | 18.1 | 5.9   |
| 13600924 | 42.3 | 21.7  |

|          |      |       |
|----------|------|-------|
| 13600927 | 38.1 | 10.4  |
| 13600931 | 1.2  | 111.7 |
| 13600932 | 1.3  | 93.9  |
| 13600934 | 75.8 | 6     |
| 13600937 | 5.4  | 8.5   |
| 13600939 | 11.0 | 8.3   |
| 13600940 | 12.1 | 10    |
| 13600941 | 7.9  | 1     |
| 13600942 | 6.4  | 90.1  |
| 13600943 | 9.0  | 3.8   |
| 13600944 | 17.2 | 9.7   |
| 13600949 | 76.1 | 8.7   |
| 13600950 | 75.4 | 24    |
| 13600951 | 0.2  | 5.8   |
| 13600954 | 0.4  | 506.5 |
| 13600955 | 5.4  | 5.9   |
| 13600958 | 6.8  | 20.3  |
| 13600959 | 2.7  | 1.3   |
| 13600960 | 13.0 | 7.2   |
| 13600962 | 14.7 | 1     |
| 13600966 | 16.5 | 1.7   |
| 13600967 | 71.3 | 36.3  |
| 13600970 | 65.7 | 34.3  |
| 13600978 | 4.2  | 21.8  |
| 13600980 | 0.8  | 24.5  |
| 13600981 | 70.5 | 226.2 |
| 13600982 | 68.2 | 3.9   |
| 13600983 | 4.4  | 3.1   |
| 13600988 | 4.5  | 38.2  |
| 13600989 | 65.7 | 4.9   |
| 13600991 | 5.0  | 1.7   |
| 13600992 | 12.8 | 5.1   |
| 13600993 | 63.7 | 12.7  |
| 13600996 | 61.0 | 28.5  |
| 13600997 | 62.2 | 16.3  |
| 13600999 | 59.3 | 1.7   |
| 13601000 | 54.8 | 1     |
| 13601001 | 56.4 | 318.9 |
| 13601005 | 10.4 | 1.5   |
| 13601006 | 18.3 | 6.8   |
| 13601009 | 25.9 | 2.2   |
| 13601014 | 20.2 | 21.1  |
| 13601018 | 16.1 | 30.9  |
| 13601020 | 17.2 | 31.6  |
| 13601023 | 46.7 | 13.9  |
| 13601027 | 0.9  | 9.9   |
| 13601028 | 54.0 | 15.2  |
| 13601031 | 46.1 | 41.4  |
| 13601033 | 46.1 | 18.6  |
| 13601034 | 29.1 | 29    |
| 13601037 | 40.1 | 2.3   |
| 13601038 | 40.1 | 2.5   |
| 13601039 | 6.6  | 1.1   |
| 13601041 | 8.1  | 3.3   |
| 13601042 | 22.3 | 1     |
| 13601044 | 5.3  | 6.9   |
| 13601045 | 54.2 | 28.1  |

|          |      |       |
|----------|------|-------|
| 13601048 | 27.6 | 1.1   |
| 13601053 | 39.6 | 31.1  |
| 13601054 | 53.7 | 28.9  |
| 13601056 | 20.3 | 149.7 |
| 13601057 | 8.0  | 6.1   |
| 13601084 | 32.0 | 8.8   |
| 13601087 | 3.8  | 6.9   |
| 13601089 | 38.8 | 31.8  |
| 13601090 | 41.1 | 1     |
| 13601093 | 48.5 | 3.7   |
| 13601095 | 1.0  | 276.1 |
| 13601096 | 5.5  | 24    |
| 13601232 | 30.8 | 12.4  |
| 13601234 | 20.2 | 82.9  |
| 13601235 | 5.0  | 1.8   |
| 13601236 | 63.8 | 19.4  |
| 13601237 | 50.8 | 5.8   |
| 13601240 | 20.1 | 21.7  |
| 13601242 | 0.6  | 212.9 |
| 13601243 | 77.4 | 12.3  |
| 13601246 | 72.1 | 5.9   |
| 13601248 | 68.3 | 77.1  |
| 13601252 | 41.4 | 2.9   |
| 13601253 | 24.3 | 18.2  |
| 13601254 | 49.4 | 4     |
| 13601256 | 78.1 | 8.4   |
| 13601259 | 36.2 | 16.3  |
| 13601260 | 56.1 | 12.2  |
| 13601263 | 0.6  | 60.9  |
| 13601265 | 79.5 | 1.3   |
| 13601267 | 66.3 | 9.7   |
| 13601269 | 61.2 | 17.8  |
| 13601276 | 46.6 | 22.4  |
| 13601277 | 24.4 | 35.9  |
| 13601278 | 58.5 | 90.1  |
| 13601279 | 76.8 | 11.1  |
| 13601281 | 50.2 | 12    |
| 13601298 | 5.2  | 1.7   |
| 13601299 | 64.5 | 194.5 |
| 13601301 | 1.3  | 29.5  |
| 13601305 | 67.9 | 8.8   |
| 13601309 | 11.1 | 3.1   |
| 13601310 | 0.9  | 11.1  |
| 13601313 | 2.3  | 1     |
| 13601314 | 1.2  | 30.7  |
| 13601316 | 10.9 | 78.8  |
| 13601319 | 17.5 | 18    |
| 13601320 | 47.8 | 30.8  |
| 13601321 | 22.2 | 1.9   |
| 13601322 | 9.5  | 18.9  |
| 13601325 | 0.7  | 10.1  |
| 13601328 | 61.0 | 17.6  |
| 13601330 | 75.7 | 14.9  |
| 13601333 | 43.7 | 1.1   |
| 13601347 | 77.6 | 13.4  |
| 13601349 | 73.2 | 1.5   |
| 13601350 | 0.6  | 73    |

|          |      |       |
|----------|------|-------|
| 13601352 | 72.4 | 182.1 |
| 13601353 | 72.7 | 1.4   |
| 13601358 | 67.3 | 14.2  |
| 13601361 | 66.7 | 6     |
| 13601362 | 66.8 | 12.9  |
| 13601363 | 15.2 | 108.8 |
| 13601365 | 65.6 | 31.2  |
| 13601366 | 64.9 | 4.1   |
| 13601367 | 65.9 | 1     |
| 13601368 | 62.8 | 27.4  |
| 13601371 | 1.0  | 155.5 |
| 13601372 | 60.2 | 7     |
| 13601373 | 62.2 | 3.5   |
| 13601376 | 64.6 | 10.9  |
| 13601378 | 37.2 | 29.3  |
| 13601379 | 45.9 | 6.3   |
| 13601380 | 46.6 | 29.5  |
| 13601381 | 53.7 | 43.5  |
| 13601383 | 50.1 | 12.5  |
| 13601384 | 48.6 | 1     |
| 13601385 | 13.7 | 16.7  |
| 13601386 | 7.5  | 3.8   |
| 13601387 | 53.1 | 25.8  |
| 13601390 | 57.4 | 33.4  |
| 13601392 | 36.7 | 21.4  |
| 13601394 | 49.3 | 11    |
| 13601398 | 2.9  | 1     |
| 13601400 | 73.7 | 12.5  |
| 13601403 | 59.1 | 10.5  |
| 13601408 | 3.9  | 1     |
| 13601409 | 8.4  | 1     |
| 13601410 | 20.5 | 2.3   |
| 13601413 | 22.1 | 1     |
| 13601420 | 28.0 | 50.3  |
| 13601424 | 4.0  | 31.9  |
| 13601427 | 12.0 | 1     |
| 13601429 | 7.7  | 18.8  |
| 13601430 | 6.7  | 1     |
| 13601431 | 3.6  | 1     |
| 13601434 | 13.1 | 8.1   |
| 13601435 | 9.3  | 6.8   |
| 13601436 | 1.0  | 424.2 |
| 13601437 | 4.1  | 299.7 |
| 13601438 | 14.5 | 1     |
| 13601440 | 16.4 | 8.7   |
| 13601442 | 15.7 | 6.2   |
| 13601443 | 48.5 | 1.4   |
| 13601444 | 39.6 | 186.8 |
| 13601446 | 55.6 | 246.2 |
| 13601447 | 43.7 | 6.8   |
| 13601457 | 39.5 | 11    |
| 13601458 | 41.4 | 10.6  |
| 13601461 | 45.6 | 5.5   |
| 13601464 | 38.8 | 11.6  |
| 13601465 | 51.2 | 31.9  |
| 13601466 | 74.2 | 16    |
| 13601467 | 46.7 | 17.3  |



|          |      |      |
|----------|------|------|
| 13601472 | 66.4 | 26.8 |
| 13601475 | 74.6 | 91.3 |
| 13601476 | 62.1 | 84.2 |
| 13601477 | 72.4 | 9    |
| 13601482 | 72.5 | 11.4 |
| 13601484 | 71.2 | 5.5  |
| 13601485 | 3.4  | 6.9  |
| 13601486 | 0.9  | 11.3 |
| 13601488 | 69.7 | 47.9 |
| 13601489 | 68.3 | 72.7 |
| 13601493 | 67.7 | 17.3 |
| 13601494 | 15.7 | 2.4  |
| 13601495 | 15.9 | 22.5 |
| 13601498 | 61.3 | 18.1 |
| 13601502 | 61.4 | 8.4  |
| 13601508 | 43.0 | 5.1  |
| 13601511 | 47.0 | 28.4 |
| 13601512 | 48.0 | 59   |
| 13601513 | 0.5  | 7.7  |
| 13601518 | 68.9 | 7    |
| 13601520 | 5.6  | 9.6  |
| 13601521 | 40.4 | 42.5 |
| 13601523 | 68.6 | 7.2  |
| 13601524 | 46.9 | 5.7  |
| 13601527 | 16.2 | 13.6 |
| 13601529 | 78.6 | 80.8 |
| 13601531 | 54.2 | 1    |
| 13601533 | 76.0 | 1    |
| 13601536 | 6.1  | 2.5  |
| 13601537 | 7.3  | 2.7  |
| 13601538 | 45.5 | 13.8 |
| 13601541 | 0.9  | 104  |
| 13601544 | 0.3  | 19.1 |
| 13601545 | 61.7 | 14.7 |
| 13601546 | 77.6 | 12.3 |
| 13601549 | 49.5 | 3.8  |
| 13601550 | 2.1  | 2    |
| 13601552 | 0.7  | 32.3 |
| 13601554 | 77.7 | 57.5 |
| 13601555 | 4.2  | 6.3  |
| 13601556 | 14.1 | 1    |
| 13601557 | 15.7 | 110  |
| 13601558 | 39.9 | 5.9  |
| 13601560 | 13.5 | 3.2  |
| 13601561 | 54.5 | 22.8 |
| 13601563 | 47.7 | 3.4  |
| 13601567 | 32.3 | 14.9 |
| 13601568 | 22.8 | 16.1 |
| 13601572 | 18.1 | 1    |
| 13601575 | 41.6 | 2.4  |
| 13601577 | 14.1 | 5.6  |
| 13601578 | 38.9 | 48.2 |
| 13601583 | 3.2  | 1.3  |
| 13601584 | 13.5 | 35.5 |
| 13601585 | 53.0 | 16.4 |
| 13601586 | 0.9  | 21.7 |
| 13601588 | 0.3  | 30.2 |

|          |      |       |
|----------|------|-------|
| 13601592 | 75.5 | 1     |
| 13601600 | 79.7 | 41.2  |
| 13601603 | 77.8 | 27.6  |
| 13601606 | 75.7 | 12.4  |
| 13601612 | 11.0 | 10    |
| 13601617 | 11.8 | 1     |
| 13601624 | 70.3 | 70.1  |
| 13601626 | 68.3 | 32.2  |
| 13601629 | 9.4  | 7.2   |
| 13601630 | 37.8 | 16    |
| 13601632 | 63.1 | 11.8  |
| 13601636 | 14.6 | 3.3   |
| 13601637 | 13.4 | 1     |
| 13601639 | 13.6 | 1     |
| 13601641 | 74.4 | 19.1  |
| 13601646 | 2.1  | 5.8   |
| 13601647 | 68.9 | 28.1  |
| 13601650 | 73.7 | 40.6  |
| 13601651 | 69.4 | 38    |
| 13601653 | 0.5  | 45.6  |
| 13601654 | 4.8  | 2.9   |
| 13601655 | 51.8 | 1.2   |
| 13601657 | 0.5  | 19.5  |
| 13601658 | 12.8 | 5.3   |
| 13601659 | 46.2 | 2.2   |
| 13601662 | 51.5 | 14    |
| 13601671 | 59.3 | 7.2   |
| 13601673 | 22.8 | 71    |
| 13601674 | 15.3 | 7.1   |
| 13601679 | 61.3 | 15.1  |
| 13601680 | 60.5 | 6.2   |
| 13601683 | 39.6 | 1.3   |
| 13601690 | 43.4 | 7.7   |
| 13601694 | 17.7 | 1     |
| 13601695 | 16.6 | 3.5   |
| 13601705 | 49.9 | 1.1   |
| 13601708 | 22.8 | 1     |
| 13601715 | 25.1 | 18.8  |
| 13601720 | 71.3 | 3.6   |
| 13601721 | 71.0 | 7.4   |
| 13601723 | 62.3 | 12.2  |
| 13601725 | 44.7 | 3.3   |
| 13601729 | 8.4  | 3.2   |
| 13601731 | 2.9  | 1     |
| 13601732 | 0.9  | 46.3  |
| 13601733 | 4.2  | 61.9  |
| 13601736 | 75.8 | 6.1   |
| 13601742 | 67.7 | 12    |
| 13601745 | 62.2 | 20.8  |
| 13601747 | 61.2 | 9.8   |
| 13601748 | 67.3 | 24.6  |
| 13601749 | 62.6 | 24.6  |
| 13601752 | 44.9 | 117.4 |
| 13601753 | 16.1 | 58.8  |
| 13601756 | 18.0 | 1.7   |
| 13601759 | 33.1 | 1.6   |
| 13601761 | 21.6 | 36.1  |

|          |      |       |
|----------|------|-------|
| 13601762 | 48.9 | 32.1  |
| 13601763 | 35.8 | 11.2  |
| 13601764 | 42.0 | 5.1   |
| 13601768 | 38.9 | 142.6 |
| 13601779 | 58.2 | 19.2  |
| 13601781 | 48.5 | 16.5  |
| 13601783 | 14.3 | 6.6   |
| 13601785 | 11.0 | 3.6   |
| 13601786 | 0.5  | 46.3  |
| 13601787 | 71.3 | 8.7   |
| 13601789 | 29.3 | 64.6  |
| 13601790 | 32.1 | 6.3   |
| 13601796 | 0.4  | 104.2 |
| 13601797 | 2.7  | 1     |
| 13601799 | 57.7 | 29.7  |
| 13601800 | 0.8  | 27    |
| 13601801 | 43.4 | 17    |
| 13601803 | 4.7  | 1.4   |
| 13601804 | 1.0  | 12.1  |
| 13601805 | 50.2 | 4     |
| 13601806 | 11.1 | 19.4  |
| 13601807 | 10.3 | 28.6  |
| 13601808 | 12.0 | 11.6  |
| 13601809 | 12.6 | 20.3  |
| 13601810 | 13.7 | 2.9   |
| 13601811 | 12.6 | 4.4   |
| 13601812 | 50.2 | 22.5  |
| 13601816 | 9.1  | 1.6   |
| 13601817 | 50.4 | 1     |
| 13601819 | 44.6 | 43.9  |
| 13601821 | 19.0 | 2.1   |
| 13601826 | 21.1 | 6     |
| 13601827 | 34.9 | 5.8   |
| 13601828 | 21.2 | 6.5   |
| 13601829 | 39.2 | 11.1  |
| 13601830 | 51.3 | 11.5  |
| 13601835 | 74.1 | 2     |
| 13601838 | 18.6 | 7.9   |
| 13601839 | 12.0 | 15.2  |
| 13601842 | 2.3  | 7.6   |
| 13601845 | 2.8  | 4     |
| 13601851 | 73.6 | 26.2  |
| 13601852 | 56.5 | 5.5   |
| 13601853 | 73.8 | 29.2  |
| 13601855 | 74.2 | 36.8  |
| 13601856 | 72.8 | 56.1  |
| 13601858 | 67.3 | 19.7  |
| 13601859 | 63.8 | 8     |
| 13601863 | 64.6 | 8.4   |
| 13601866 | 62.7 | 1.3   |
| 13601875 | 59.2 | 6.7   |
| 13601879 | 48.7 | 4.1   |
| 13601880 | 45.8 | 4.5   |
| 13601881 | 45.7 | 10.7  |
| 13601882 | 35.6 | 7.3   |
| 13601883 | 26.7 | 10.1  |
| 13601885 | 59.5 | 20.2  |

|          |      |       |
|----------|------|-------|
| 13601888 | 45.3 | 5.6   |
| 13601889 | 33.7 | 82.8  |
| 13601896 | 34.7 | 2.4   |
| 13601899 | 29.4 | 38.7  |
| 13601900 | 47.9 | 5.6   |
| 13601901 | 48.4 | 27.1  |
| 13601902 | 13.0 | 1     |
| 13601905 | 12.4 | 1.1   |
| 13601907 | 0.9  | 20.1  |
| 13601908 | 28.7 | 4.7   |
| 13601909 | 60.3 | 14.8  |
| 13601912 | 30.7 | 18.6  |
| 13601917 | 1.2  | 57.1  |
| 13601922 | 5.8  | 3.5   |
| 13601924 | 10.8 | 1     |
| 13601925 | 23.5 | 79.3  |
| 13601929 | 5.7  | 44.4  |
| 13601930 | 10.9 | 1.3   |
| 13601931 | 7.4  | 1     |
| 13601934 | 7.1  | 22.1  |
| 13601935 | 27.7 | 27.4  |
| 13601936 | 0.5  | 67.4  |
| 13601938 | 9.4  | 1.2   |
| 13601939 | 9.7  | 1     |
| 13601941 | 3.5  | 1     |
| 13601942 | 14.7 | 5.1   |
| 13601946 | 0.9  | 5.6   |
| 13601947 | 4.8  | 30.2  |
| 13601951 | 14.5 | 1     |
| 13601952 | 19.8 | 2.1   |
| 13601953 | 4.3  | 14.7  |
| 13601954 | 4.5  | 104.3 |
| 13601956 | 49.9 | 9.4   |
| 13601960 | 35.6 | 1     |
| 13601962 | 5.3  | 1.1   |
| 13601963 | 22.3 | 7     |
| 13601964 | 50.4 | 14.7  |
| 13601966 | 11.4 | 27.3  |
| 13601971 | 39.1 | 28.7  |
| 13601972 | 18.8 | 13.7  |
| 13601974 | 15.8 | 27.6  |
| 13601978 | 1.8  | 35.4  |
| 13601979 | 30.0 | 29.1  |
| 13601980 | 57.9 | 6.9   |
| 13601982 | 0.3  | 1.5   |
| 13602040 | 24.0 | 19.6  |
| 13602042 | 1.2  | 80.8  |
| 13602043 | 43.3 | 1     |
| 13602044 | 44.3 | 9.1   |
| 13602047 | 0.6  | 18.8  |
| 13602052 | 44.1 | 475.9 |
| 13602055 | 6.2  | 2.5   |
| 13602057 | 40.8 | 26.4  |
| 13602058 | 56.7 | 99.9  |
| 13602060 | 0.3  | 1.8   |
| 13602434 | 51.9 | 14.3  |
| 13602435 | 0.1  | 17.6  |

|          |      |       |
|----------|------|-------|
| 13602438 | 79.5 | 283.8 |
| 13602439 | 0.1  | 1     |
| 13602441 | 0.2  | 1.6   |
| 13602442 | 64.3 | 5.2   |
| 13602444 | 74.1 | 21.3  |
| 13602445 | 70.0 | 33    |
| 13602447 | 2.5  | 1.4   |
| 13602453 | 0.9  | 28.1  |
| 13602455 | 62.4 | 90.7  |
| 13602459 | 76.8 | 18.5  |
| 13602460 | 62.9 | 8.5   |
| 13602461 | 71.9 | 2.6   |
| 13602462 | 13.0 | 1     |
| 13602463 | 17.0 | 95.7  |
| 13602465 | 73.3 | 35.9  |
| 13602467 | 65.6 | 3.9   |
| 13602468 | 16.3 | 1.2   |
| 13602469 | 15.4 | 3.8   |
| 13602470 | 66.3 | 2.4   |
| 13602478 | 44.2 | 4.6   |
| 13602482 | 40.8 | 2.3   |
| 13602483 | 47.3 | 42.6  |
| 13602484 | 48.4 | 7.4   |
| 13602485 | 52.8 | 5.4   |
| 13602486 | 37.6 | 24.4  |
| 13602487 | 50.4 | 55.2  |
| 13602489 | 43.1 | 197.3 |
| 13602491 | 31.0 | 23.1  |
| 13602498 | 52.4 | 81.5  |
| 13602501 | 14.4 | 2.7   |
| 13602502 | 23.5 | 1     |
| 13602505 | 11.1 | 13.9  |
| 13602508 | 0.9  | 8.8   |
| 13602509 | 66.5 | 8.2   |
| 13602512 | 7.3  | 2.5   |
| 13602513 | 7.3  | 3.1   |
| 13602517 | 0.7  | 11.5  |
| 13602525 | 7.2  | 1     |
| 13602528 | 15.5 | 13.7  |
| 13602529 | 5.8  | 1.5   |
| 13602532 | 13.8 | 3.5   |
| 13602536 | 25.3 | 12.9  |
| 13602538 | 3.7  | 1     |
| 13602543 | 51.9 | 8.2   |
| 13602546 | 23.1 | 56.1  |
| 13602551 | 0.7  | 24.4  |
| 13602552 | 21.2 | 2.1   |
| 13602553 | 29.5 | 24    |
| 13602554 | 41.4 | 9.9   |
| 13602556 | 39.6 | 33    |
| 13602557 | 44.5 | 2.4   |
| 13602560 | 29.3 | 12.4  |
| 13602563 | 0.8  | 10.7  |
| 13602567 | 54.3 | 3.4   |
| 13602569 | 27.2 | 26.6  |
| 13602571 | 45.1 | 8.1   |
| 13602574 | 12.7 | 9.3   |

|          |      |       |
|----------|------|-------|
| 13602578 | 25.7 | 3.2   |
| 13602579 | 25.0 | 1     |
| 13602580 | 77.0 | 22    |
| 13602587 | 75.6 | 222.8 |
| 13602589 | 71.1 | 9     |
| 13602592 | 27.6 | 8.8   |
| 13602597 | 35.4 | 22.3  |
| 13602598 | 23.8 | 26.2  |
| 13602601 | 52.2 | 3     |
| 13602604 | 35.4 | 2.9   |
| 13602606 | 18.4 | 1     |
| 13602607 | 48.7 | 67.5  |
| 13602609 | 72.3 | 9.1   |
| 13602612 | 21.4 | 4.6   |
| 13602613 | 55.5 | 9.3   |
| 13602616 | 4.5  | 7     |
| 13602618 | 0.4  | 70.6  |
| 13602619 | 0.4  | 102.2 |
| 13602622 | 3.4  | 1     |
| 13602623 | 64.1 | 13.9  |
| 13602627 | 4.2  | 12.7  |
| 13602629 | 10.9 | 3     |
| 13602630 | 74.5 | 12.9  |
| 13602632 | 11.3 | 40.1  |
| 13602635 | 13.6 | 17.7  |
| 13602640 | 16.5 | 106.5 |
| 13602644 | 10.4 | 64.4  |
| 13602645 | 54.9 | 1.7   |
| 13602646 | 43.9 | 47    |
| 13602653 | 0.8  | 23.6  |
| 13602660 | 29.3 | 20.7  |
| 13602661 | 8.6  | 1     |
| 13602662 | 1.8  | 50.4  |
| 13602663 | 49.0 | 11.2  |
| 13602664 | 11.7 | 35.3  |
| 13602667 | 14.1 | 18.1  |
| 13602669 | 0.7  | 23    |
| 13602671 | 76.3 | 8.2   |
| 13602672 | 32.3 | 58.1  |
| 13602673 | 62.6 | 30.4  |
| 13602676 | 77.2 | 87.8  |
| 13602679 | 61.4 | 8.7   |
| 13602681 | 77.3 | 12.8  |
| 13602687 | 75.8 | 16.9  |
| 13602691 | 61.8 | 27.5  |
| 13602693 | 79.0 | 2.1   |
| 13602695 | 69.0 | 42    |
| 13602696 | 13.4 | 2.2   |
| 13602697 | 14.0 | 3.3   |
| 13602705 | 48.6 | 12.8  |
| 13602708 | 43.4 | 2     |
| 13602712 | 30.6 | 22.4  |
| 13602719 | 49.2 | 6.5   |
| 13602723 | 38.8 | 1.6   |
| 13602726 | 8.1  | 1     |
| 13602730 | 65.2 | 123.2 |
| 13602731 | 10.6 | 1.6   |

|          |      |       |
|----------|------|-------|
| 13602733 | 38.6 | 1.2   |
| 13602735 | 46.8 | 47.4  |
| 13602737 | 72.8 | 15    |
| 13602738 | 24.3 | 16.8  |
| 13602739 | 6.8  | 7.9   |
| 13602741 | 12.0 | 1.6   |
| 13602743 | 80.0 | 1     |
| 13602745 | 0.4  | 26.7  |
| 13602748 | 0.6  | 136   |
| 13602749 | 1.0  | 64    |
| 13602751 | 69.3 | 27.3  |
| 13602752 | 62.7 | 1.7   |
| 13602757 | 4.5  | 36.8  |
| 13602759 | 3.6  | 2     |
| 13602762 | 36.7 | 2.5   |
| 13602771 | 11.0 | 36.1  |
| 13602773 | 1.0  | 14.6  |
| 13602774 | 18.1 | 17.6  |
| 13602775 | 53.3 | 1.1   |
| 13602776 | 25.9 | 23.8  |
| 13602777 | 54.4 | 1     |
| 13602780 | 55.1 | 14.7  |
| 13602782 | 55.6 | 122.3 |
| 13602783 | 39.0 | 12.6  |
| 13602785 | 35.7 | 9.6   |
| 13602786 | 21.6 | 46.6  |
| 13602787 | 53.2 | 6.6   |
| 13602790 | 57.6 | 13.9  |
| 13602794 | 56.2 | 14.1  |
| 13602796 | 48.4 | 13    |
| 13602797 | 29.5 | 14    |
| 13602799 | 12.0 | 2.3   |
| 13602802 | 67.4 | 30.8  |
| 13602805 | 77.6 | 12.9  |
| 13602807 | 36.5 | 5.3   |
| 13602811 | 0.8  | 8.2   |
| 13602813 | 64.5 | 77    |
| 13602814 | 73.5 | 14.7  |
| 13602816 | 72.3 | 15.6  |
| 13602818 | 76.8 | 38.5  |
| 13602819 | 75.7 | 9.3   |
| 13602824 | 13.1 | 1     |
| 13602828 | 24.2 | 1.8   |
| 13602830 | 52.8 | 13.6  |
| 13602831 | 56.5 | 15.2  |
| 13602834 | 72.8 | 16    |
| 13602835 | 50.6 | 4.4   |
| 13602836 | 30.4 | 11.6  |
| 13602837 | 43.5 | 5.6   |
| 13602839 | 26.4 | 10.8  |
| 13602840 | 65.2 | 20.4  |
| 13602841 | 17.1 | 9     |
| 13602842 | 54.8 | 4     |
| 13602843 | 29.1 | 20    |
| 13602850 | 29.0 | 14.3  |
| 13602852 | 25.9 | 3.2   |
| 13602854 | 14.1 | 77.1  |



|          |      |        |
|----------|------|--------|
| 13602855 | 0.2  | 12.9   |
| 13602857 | 60.3 | 142.4  |
| 13602860 | 0.4  | 25.2   |
| 13602863 | 0.5  | 100.6  |
| 13602864 | 0.4  | 71.7   |
| 13602866 | 0.4  | 101.8  |
| 13602867 | 69.9 | 28.5   |
| 13602868 | 61.9 | 95.5   |
| 13602870 | 8.1  | 9.3    |
| 13602873 | 8.9  | 25.3   |
| 13602874 | 10.2 | 4.6    |
| 13602880 | 6.7  | 4.5    |
| 13602881 | 15.5 | 1      |
| 13602882 | 60.5 | 22.9   |
| 13602888 | 68.3 | 13.8   |
| 13602893 | 2.0  | 6.7    |
| 13602894 | 0.3  | 19.5   |
| 13602895 | 1.1  | 13.8   |
| 13602898 | 0.6  | 14.5   |
| 13602902 | 5.0  | 1      |
| 13602903 | 41.6 | 187.5  |
| 13602907 | 18.2 | 1      |
| 13602910 | 18.3 | 1      |
| 13602914 | 54.0 | 16.5   |
| 13602917 | 23.3 | 1.6    |
| 13602918 | 38.4 | 11.2   |
| 13602922 | 60.3 | 8.9    |
| 13602924 | 29.6 | 9.2    |
| 13602927 | 59.9 | 16.4   |
| 13602928 | 16.3 | 1      |
| 13602930 | 11.0 | 1      |
| 13602936 | 62.3 | 2.9    |
| 13602937 | 26.4 | 19.3   |
| 13602939 | 12.7 | 1      |
| 13602940 | 13.1 | 10     |
| 13602943 | 9.1  | 115.4  |
| 13602944 | 50.7 | 11.2   |
| 13603025 | 45.5 | 92.2   |
| 13603028 | 2.7  | 1      |
| 13603029 | 5.4  | 3.1    |
| 13603030 | 34.8 | 2.4    |
| 13603037 | 40.2 | 109.8  |
| 13603038 | 47.8 | 7.4    |
| 13603128 | 1.0  | 1034.2 |
| 13603133 | 67.8 | 16.6   |
| 13603134 | 1.4  | 67.6   |
| 13603136 | 0.3  | 64.2   |
| 13603137 | 76.0 | 91.1   |
| 13603138 | 0.3  | 15.8   |
| 13603140 | 3.1  | 1      |
| 13603141 | 1.5  | 2.9    |
| 13603144 | 67.9 | 19.6   |
| 13603145 | 2.4  | 1      |
| 13603147 | 0.6  | 149.6  |
| 13603149 | 70.7 | 81.4   |
| 13603151 | 76.4 | 6.3    |
| 13603155 | 4.2  | 13     |

|          |      |       |
|----------|------|-------|
| 13603156 | 77.2 | 72.2  |
| 13603157 | 70.8 | 10.8  |
| 13603160 | 78.5 | 5.5   |
| 13603161 | 14.4 | 7.5   |
| 13603165 | 16.5 | 8.9   |
| 13603166 | 12.1 | 5.6   |
| 13603173 | 72.7 | 231.2 |
| 13603175 | 70.0 | 3.4   |
| 13603177 | 11.7 | 1     |
| 13603181 | 44.2 | 5.3   |
| 13603182 | 58.3 | 3.6   |
| 13603183 | 1.7  | 10.1  |
| 13603184 | 29.9 | 19.1  |
| 13603185 | 32.2 | 22.9  |
| 13603190 | 43.0 | 8.8   |
| 13603191 | 23.4 | 16.8  |
| 13603194 | 48.2 | 7.2   |
| 13603195 | 0.9  | 11.4  |
| 13603196 | 40.4 | 8.2   |
| 13603198 | 22.6 | 9.1   |
| 13603199 | 21.6 | 20.4  |
| 13603200 | 11.1 | 33.3  |
| 13603203 | 64.1 | 198.5 |
| 13603207 | 0.4  | 36    |
| 13603208 | 73.4 | 95.5  |
| 13603210 | 0.7  | 16.2  |
| 13603211 | 9.0  | 1     |
| 13603212 | 63.1 | 1     |
| 13603213 | 11.1 | 3.1   |
| 13603217 | 62.5 | 12.7  |
| 13603218 | 37.9 | 10.1  |
| 13603219 | 11.1 | 48.2  |
| 13603225 | 1.8  | 20.5  |
| 13603226 | 9.1  | 1     |
| 13603228 | 11.1 | 10    |
| 13603230 | 9.1  | 8.1   |
| 13603231 | 10.7 | 1     |
| 13603232 | 16.2 | 46.5  |
| 13603235 | 6.1  | 10.8  |
| 13603237 | 79.4 | 10    |
| 13603238 | 61.9 | 29.2  |
| 13603239 | 68.3 | 76.7  |
| 13603240 | 73.8 | 92.7  |
| 13603241 | 60.4 | 61    |
| 13603246 | 49.7 | 25.3  |
| 13603247 | 46.3 | 2.4   |
| 13603249 | 37.1 | 23.2  |
| 13603253 | 53.0 | 3.9   |
| 13603255 | 45.2 | 13.2  |
| 13603259 | 51.0 | 42.4  |
| 13603261 | 4.5  | 2.2   |
| 13603262 | 45.2 | 1.4   |
| 13603266 | 29.9 | 30.6  |
| 13603268 | 37.7 | 17.3  |
| 13603273 | 19.2 | 3.9   |
| 13603275 | 24.2 | 297.1 |
| 13603277 | 55.4 | 11.1  |

|          |      |       |
|----------|------|-------|
| 13603279 | 39.8 | 19.9  |
| 13603280 | 45.1 | 36.7  |
| 13603283 | 27.3 | 6     |
| 13603285 | 38.3 | 17.9  |
| 13603286 | 23.4 | 41.2  |
| 13603287 | 52.6 | 4.3   |
| 13603288 | 20.8 | 11.4  |
| 13603289 | 26.2 | 9     |
| 13603310 | 73.2 | 57.6  |
| 13603318 | 1.6  | 14    |
| 13603319 | 74.4 | 16.5  |
| 13603320 | 75.5 | 9.7   |
| 13603321 | 39.1 | 2.4   |
| 13603323 | 2.1  | 11.9  |
| 13603328 | 3.9  | 1     |
| 13603329 | 0.7  | 18.5  |
| 13603330 | 77.2 | 14.8  |
| 13603334 | 9.1  | 1     |
| 13603335 | 63.7 | 9     |
| 13603336 | 73.8 | 23.6  |
| 13603337 | 72.0 | 24.1  |
| 13603338 | 2.3  | 4.7   |
| 13603343 | 65.2 | 77.4  |
| 13603344 | 12.6 | 14.5  |
| 13603350 | 69.4 | 57.2  |
| 13603352 | 7.8  | 1.9   |
| 13603353 | 49.4 | 7.7   |
| 13603355 | 37.1 | 46.3  |
| 13603356 | 40.6 | 37.5  |
| 13603361 | 51.1 | 38.3  |
| 13603362 | 15.7 | 1     |
| 13603365 | 27.3 | 9.7   |
| 13603367 | 18.2 | 38.8  |
| 13603368 | 9.0  | 31.4  |
| 13603369 | 59.8 | 54.3  |
| 13603370 | 33.8 | 30.1  |
| 13603371 | 64.8 | 1.7   |
| 13603374 | 8.1  | 6.9   |
| 13603378 | 26.3 | 21.6  |
| 13603379 | 34.5 | 11.9  |
| 13603385 | 45.7 | 1.9   |
| 13603389 | 32.0 | 9.5   |
| 13603398 | 59.1 | 24.7  |
| 13603399 | 54.0 | 1     |
| 13603401 | 70.6 | 8.3   |
| 13603402 | 11.7 | 1     |
| 13603410 | 0.2  | 2.4   |
| 13603412 | 5.2  | 5.1   |
| 13603414 | 1.9  | 21.3  |
| 13603417 | 2.3  | 1     |
| 13603419 | 11.7 | 17.4  |
| 13603420 | 62.5 | 40.6  |
| 13603421 | 3.8  | 3.2   |
| 13603422 | 6.9  | 4.4   |
| 13603424 | 66.3 | 2.9   |
| 13603430 | 63.2 | 15.9  |
| 13603431 | 6.1  | 611.5 |

|          |      |       |
|----------|------|-------|
| 13603442 | 61.9 | 14.7  |
| 13603448 | 48.2 | 1.4   |
| 13603450 | 23.0 | 5.6   |
| 13603452 | 21.5 | 23.3  |
| 13603454 | 27.3 | 40.7  |
| 13603455 | 47.8 | 6.3   |
| 13603456 | 51.7 | 14.7  |
| 13603458 | 53.8 | 17.8  |
| 13603459 | 54.2 | 4.9   |
| 13603461 | 58.1 | 14.7  |
| 13603464 | 37.7 | 13    |
| 13603468 | 54.3 | 1     |
| 13603470 | 40.0 | 3     |
| 13603472 | 8.9  | 149.2 |
| 13603473 | 31.9 | 45.9  |
| 13603474 | 76.0 | 6.1   |
| 13603476 | 58.1 | 4     |
| 13603480 | 3.8  | 12    |
| 13603483 | 44.4 | 2.6   |
| 13603486 | 3.1  | 1     |
| 13603489 | 60.5 | 6.5   |
| 13603491 | 41.5 | 76    |
| 13603493 | 4.8  | 9.2   |
| 13603495 | 70.3 | 38.3  |
| 13603496 | 10.0 | 1     |
| 13603507 | 29.4 | 35.7  |
| 13603509 | 13.1 | 6.4   |
| 13603510 | 55.3 | 16.2  |
| 13603512 | 44.2 | 22.6  |
| 13603514 | 17.2 | 1     |
| 13603515 | 56.6 | 15.7  |
| 13603516 | 52.8 | 22.2  |
| 13603520 | 34.5 | 44    |
| 13603521 | 30.9 | 8.5   |
| 13603522 | 48.4 | 3.5   |
| 13603523 | 10.4 | 47.1  |
| 13603524 | 21.4 | 12.3  |
| 13603527 | 6.6  | 3     |
| 13603528 | 29.5 | 11    |
| 13603531 | 55.1 | 78.7  |
| 13603533 | 45.4 | 19    |
| 13603535 | 1.0  | 29.9  |
| 13603537 | 4.5  | 3.8   |
| 13603538 | 49.0 | 9.6   |
| 13603539 | 38.5 | 4.7   |
| 13603541 | 43.4 | 1     |
| 13603543 | 36.4 | 28    |
| 13603546 | 38.0 | 3.5   |
| 13603550 | 37.4 | 30.7  |
| 13603559 | 21.2 | 17.9  |
| 13603561 | 1.6  | 63.2  |
| 13603562 | 43.4 | 7.1   |
| 13603563 | 35.1 | 5.2   |
| 13603565 | 74.0 | 48.6  |
| 13603567 | 3.2  | 1     |
| 13603568 | 71.7 | 10.1  |
| 13603572 | 4.4  | 3.4   |

|          |      |      |
|----------|------|------|
| 13603577 | 68.7 | 28.2 |
| 13603578 | 12.3 | 4.7  |
| 13603579 | 12.7 | 1    |
| 13603580 | 13.6 | 10   |
| 13603581 | 56.9 | 13.1 |
| 13603582 | 9.7  | 2.4  |
| 13603583 | 7.3  | 1    |
| 13603591 | 76.7 | 10   |
| 13603592 | 76.9 | 3.6  |
| 13603593 | 62.3 | 44.4 |
| 13603594 | 9.2  | 8.2  |
| 13603600 | 77.6 | 26.2 |
| 13603601 | 60.4 | 13.5 |
| 13603603 | 30.1 | 40.4 |
| 13603604 | 44.6 | 1.6  |
| 13603605 | 28.7 | 13.3 |
| 13603606 | 65.8 | 3.9  |
| 13603608 | 41.2 | 4.2  |
| 13603609 | 26.2 | 78.4 |
| 13603610 | 26.1 | 59.8 |
| 13603611 | 34.8 | 92   |
| 13603612 | 51.8 | 6.3  |
| 13603614 | 1.5  | 9.1  |
| 13603617 | 42.0 | 14.1 |
| 13603619 | 0.6  | 71.1 |
| 13603620 | 52.3 | 2.5  |
| 13603621 | 28.8 | 43   |
| 13603622 | 18.4 | 5.1  |
| 13603626 | 0.6  | 118  |
| 13603629 | 71.9 | 37.4 |
| 13603632 | 72.0 | 25.5 |
| 13603634 | 38.5 | 1.6  |
| 13603637 | 45.0 | 5.1  |
| 13603640 | 62.0 | 9.6  |
| 13603643 | 70.0 | 22.9 |
| 13603646 | 64.0 | 15.1 |
| 13603650 | 61.4 | 81.7 |
| 13603652 | 4.8  | 9.6  |
| 13603653 | 64.8 | 41.8 |
| 13603655 | 16.2 | 1.4  |
| 13603656 | 4.1  | 1169 |
| 13603657 | 4.9  | 6.1  |
| 13603658 | 15.6 | 1.7  |
| 13603659 | 12.9 | 1    |
| 13603660 | 12.5 | 9.5  |
| 13603661 | 79.8 | 75.8 |
| 13603665 | 52.8 | 3.6  |
| 13603666 | 76.0 | 25.4 |
| 13603667 | 32.9 | 5.5  |
| 13603670 | 50.0 | 63.6 |
| 13603676 | 35.4 | 10.5 |
| 13603677 | 3.1  | 1    |
| 13603678 | 22.8 | 4.9  |
| 13603680 | 21.5 | 21.2 |
| 13603682 | 33.6 | 2.5  |
| 13603685 | 44.3 | 4.4  |
| 13603686 | 41.2 | 12.6 |

|          |      |       |
|----------|------|-------|
| 13603689 | 45.2 | 44.4  |
| 13603696 | 54.3 | 2.1   |
| 13603697 | 24.7 | 1     |
| 13603704 | 62.3 | 56.1  |
| 13603706 | 50.4 | 52.9  |
| 13603707 | 56.0 | 4.1   |
| 13603712 | 6.3  | 1.8   |
| 13603713 | 66.7 | 105.3 |
| 13603714 | 9.6  | 5.9   |
| 13603715 | 4.9  | 1.5   |
| 13603716 | 69.0 | 43.8  |
| 13603717 | 6.7  | 1     |
| 13603719 | 2.4  | 1.1   |
| 13603729 | 74.2 | 60.7  |
| 13603733 | 6.4  | 5.6   |
| 13603734 | 67.4 | 25.3  |
| 13603738 | 11.6 | 4.2   |
| 13603741 | 71.3 | 12.1  |
| 13603742 | 9.8  | 21.7  |
| 13603744 | 71.8 | 24.3  |
| 13603746 | 72.2 | 1     |
| 13603750 | 2.2  | 4.4   |
| 13603756 | 37.8 | 16.6  |
| 13603758 | 28.7 | 4.6   |
| 13603759 | 43.9 | 19.9  |
| 13603762 | 39.6 | 67.9  |
| 13603763 | 59.0 | 122.1 |
| 13603765 | 27.2 | 85.9  |
| 13603767 | 55.4 | 33    |
| 13603770 | 13.0 | 22.4  |
| 13603773 | 0.8  | 8.9   |
| 13603775 | 33.7 | 26.2  |
| 13603777 | 47.9 | 30    |
| 13603778 | 19.4 | 2.7   |
| 13603780 | 23.3 | 20.1  |
| 13603782 | 26.3 | 3.2   |
| 13603784 | 4.5  | 1.1   |
| 13603788 | 27.6 | 376.3 |
| 13603789 | 65.3 | 9.2   |
| 13603790 | 37.6 | 29.8  |
| 13603792 | 14.6 | 4.8   |
| 13603794 | 29.2 | 50.8  |
| 13603795 | 21.9 | 1     |
| 13603797 | 7.7  | 2.5   |
| 13603798 | 77.6 | 33.8  |
| 13603799 | 44.7 | 4.1   |
| 13603802 | 0.6  | 207.2 |
| 13603807 | 55.4 | 5.2   |
| 13603808 | 72.6 | 133.2 |
| 13603809 | 61.4 | 2.8   |
| 13603811 | 1.9  | 15.5  |
| 13603813 | 3.7  | 1     |
| 13603814 | 2.1  | 23    |
| 13603816 | 0.4  | 32.2  |
| 13603817 | 62.6 | 61.2  |
| 13603823 | 79.1 | 43.9  |
| 13603824 | 67.2 | 49.2  |

|          |      |       |
|----------|------|-------|
| 13603828 | 13.5 | 4.6   |
| 13603832 | 15.6 | 23.5  |
| 13603835 | 15.3 | 15.1  |
| 13603837 | 27.9 | 9.1   |
| 13603841 | 56.5 | 1.1   |
| 13603843 | 22.3 | 112.4 |
| 13603850 | 20.5 | 5.3   |
| 13603851 | 44.0 | 6.2   |
| 13603854 | 43.5 | 23.1  |
| 13603858 | 0.7  | 13.8  |
| 13603859 | 17.9 | 1     |
| 13603862 | 67.5 | 17.9  |
| 13603868 | 1.8  | 14.5  |
| 13603869 | 25.8 | 123.7 |
| 13603871 | 39.4 | 1.5   |
| 13603872 | 24.3 | 5     |
| 13603873 | 13.4 | 1     |
| 13603874 | 7.6  | 11.6  |
| 13603877 | 75.6 | 1.6   |
| 13603880 | 72.5 | 18.2  |
| 13603881 | 6.5  | 5.7   |
| 13603882 | 5.2  | 9.4   |
| 13603883 | 8.7  | 4.5   |
| 13603884 | 8.4  | 14.9  |
| 13603885 | 71.5 | 34.9  |
| 13603887 | 10.3 | 17.7  |
| 13603888 | 75.6 | 11.7  |
| 13603889 | 64.3 | 27.2  |
| 13603891 | 8.1  | 1.2   |
| 13603893 | 8.6  | 5.3   |
| 13603894 | 77.8 | 37.6  |
| 13603898 | 11.7 | 6     |
| 13603903 | 37.2 | 9.3   |
| 13603904 | 73.4 | 19.9  |
| 13603905 | 17.3 | 1.3   |
| 13603912 | 67.9 | 36.9  |
| 13603914 | 43.0 | 13.3  |
| 13603916 | 66.5 | 32.6  |
| 13603918 | 31.7 | 33.1  |
| 13603920 | 43.7 | 4.3   |
| 13603921 | 42.5 | 10    |
| 13603923 | 13.8 | 24.6  |
| 13603927 | 26.1 | 20.6  |
| 13603929 | 57.6 | 1     |
| 13603935 | 77.5 | 5.6   |
| 13603936 | 70.9 | 4.3   |
| 13603937 | 54.8 | 20.3  |
| 13603938 | 18.5 | 95.6  |
| 13603939 | 62.4 | 26.2  |
| 13603941 | 1.6  | 38.3  |
| 13603945 | 2.9  | 3.3   |
| 13603946 | 35.6 | 14.7  |
| 13603948 | 0.4  | 66.3  |
| 13603949 | 3.2  | 3.2   |
| 13603950 | 12.6 | 125.6 |
| 13603951 | 57.3 | 11.8  |
| 13603952 | 1.9  | 8.5   |



|          |      |       |
|----------|------|-------|
| 13603962 | 53.9 | 6.6   |
| 13604011 | 61.3 | 21.1  |
| 13604039 | 66.9 | 71.1  |
| 13604088 | 13.4 | 4.7   |
| 13604125 | 76.4 | 40.5  |
| 13604147 | 75.0 | 9.3   |
| 13604150 | 53.4 | 17.2  |
| 13604178 | 66.9 | 27.4  |
| 13604183 | 11.9 | 36.6  |
| 13604185 | 56.7 | 35.7  |
| 13604189 | 15.4 | 1     |
| 13604193 | 26.0 | 3.2   |
| 13604197 | 2.4  | 2     |
| 13604201 | 76.4 | 31.5  |
| 13604210 | 13.8 | 33.7  |
| 13604245 | 45.2 | 3.3   |
| 13604248 | 10.0 | 189.3 |
| 13604256 | 1.8  | 11.2  |
| 13604260 | 9.4  | 1.4   |
| 13604278 | 5.9  | 31.5  |
| 13604298 | 60.8 | 32.1  |
| 13604312 | 57.1 | 5.6   |
| 13604313 | 24.2 | 3.2   |
| 13604314 | 60.8 | 160.2 |
| 13604316 | 46.8 | 16.5  |
| 13604324 | 15.3 | 11.6  |
| 13604327 | 9.0  | 1.4   |
| 13604328 | 28.9 | 10.9  |
| 13604329 | 66.3 | 24.8  |
| 13604368 | 21.2 | 32.1  |
| 13604373 | 66.8 | 14.7  |
| 13604377 | 79.9 | 1.1   |
| 13604378 | 78.4 | 38.9  |
| 13604379 | 0.9  | 10.2  |
| 13604380 | 61.7 | 11.5  |
| 13604384 | 78.0 | 51.9  |
| 13604385 | 75.9 | 15.3  |
| 13604387 | 4.8  | 22.9  |
| 13604394 | 49.6 | 2.2   |
| 13604397 | 54.4 | 60.5  |
| 13604402 | 54.1 | 1     |
| 13604404 | 56.7 | 2.2   |
| 13604405 | 45.2 | 18.6  |
| 13604407 | 38.1 | 14.4  |
| 13604409 | 10.6 | 70    |
| 13604410 | 48.7 | 36.3  |
| 13604413 | 38.6 | 26.9  |
| 13604416 | 37.1 | 44.6  |
| 13604419 | 8.9  | 3     |
| 13604424 | 17.7 | 7.7   |
| 13604425 | 53.1 | 52.5  |
| 13604429 | 38.8 | 2.3   |
| 13604430 | 62.4 | 8     |
| 13604431 | 43.2 | 3     |
| 13604432 | 57.7 | 4.9   |
| 13604433 | 40.7 | 13.2  |
| 13604435 | 72.7 | 4.6   |

|          |      |       |
|----------|------|-------|
| 13604438 | 54.7 | 7.5   |
| 13604443 | 47.5 | 18.3  |
| 13604444 | 5.8  | 1     |
| 13604448 | 73.9 | 1     |
| 13604449 | 11.0 | 62.9  |
| 13604457 | 6.0  | 14.1  |
| 13604459 | 17.8 | 628.5 |
| 13604460 | 75.0 | 10.5  |
| 13604462 | 15.2 | 2.5   |
| 13604463 | 13.1 | 3.3   |
| 13604464 | 65.4 | 34.4  |
| 13604465 | 14.9 | 1.4   |
| 13604466 | 71.4 | 8.7   |
| 13604467 | 62.2 | 28.9  |
| 13604468 | 69.4 | 42.5  |
| 13604469 | 61.6 | 20    |
| 13604472 | 67.9 | 177.1 |
| 13604474 | 34.2 | 8.1   |
| 13604476 | 4.0  | 15.2  |
| 13604481 | 13.7 | 1     |
| 13604485 | 37.3 | 11.3  |
| 13604487 | 21.5 | 16.2  |
| 13604491 | 38.0 | 10.8  |
| 13604492 | 46.1 | 5.5   |
| 13604493 | 29.9 | 16.2  |
| 13604494 | 26.2 | 8.6   |
| 13604497 | 57.4 | 64.1  |
| 13604499 | 35.2 | 18.4  |
| 13604503 | 12.3 | 1.3   |
| 13604507 | 73.2 | 4.9   |
| 13604508 | 79.8 | 3.2   |
| 13604513 | 57.5 | 7.9   |
| 13604514 | 66.7 | 38.1  |
| 13604516 | 62.4 | 21.9  |
| 13604519 | 70.5 | 50.2  |
| 13604524 | 74.5 | 17.7  |
| 13604526 | 44.0 | 101.6 |
| 13604527 | 4.5  | 3.2   |
| 13604529 | 3.6  | 49.2  |
| 13604531 | 73.8 | 15.2  |
| 13604534 | 5.0  | 1.2   |
| 13604537 | 67.1 | 37.8  |
| 13604540 | 53.9 | 21.9  |
| 13604543 | 4.4  | 6.6   |
| 13604546 | 4.9  | 15    |
| 13604548 | 51.6 | 1.7   |
| 13604549 | 9.8  | 5.1   |
| 13604550 | 76.2 | 20.6  |
| 13604554 | 37.1 | 26.4  |
| 13604555 | 47.8 | 34.6  |
| 13604556 | 0.4  | 28.5  |
| 13604558 | 27.2 | 5.6   |
| 13604563 | 13.4 | 38.2  |
| 13604564 | 40.9 | 3.3   |
| 13604565 | 22.2 | 7.7   |
| 13604567 | 42.9 | 17.2  |
| 13604568 | 10.6 | 1     |

|          |      |       |
|----------|------|-------|
| 13604570 | 0.7  | 34    |
| 13604571 | 59.2 | 24.7  |
| 13604572 | 0.3  | 3     |
| 13604576 | 63.8 | 19.9  |
| 13604578 | 76.0 | 26.3  |
| 13604580 | 9.8  | 1     |
| 13604581 | 60.9 | 11.8  |
| 13604582 | 0.3  | 24.6  |
| 13604583 | 45.7 | 61.3  |
| 13604585 | 31.7 | 1     |
| 13604588 | 47.5 | 14    |
| 13604589 | 38.0 | 14.7  |
| 13604590 | 22.3 | 43.8  |
| 13604596 | 77.3 | 8.4   |
| 13604599 | 6.9  | 1.5   |
| 13604600 | 62.7 | 4     |
| 13604601 | 9.8  | 1     |
| 13604603 | 6.1  | 1     |
| 13604604 | 3.8  | 1     |
| 13604605 | 11.4 | 1     |
| 13604606 | 0.8  | 88.3  |
| 13604608 | 7.6  | 1.8   |
| 13604609 | 61.7 | 2.9   |
| 13604610 | 24.7 | 39.7  |
| 13604612 | 69.6 | 125.2 |
| 13604615 | 74.7 | 55.3  |
| 13604618 | 73.6 | 13.4  |
| 13604621 | 47.9 | 21.7  |
| 13604622 | 40.3 | 22.4  |
| 13604625 | 26.4 | 2.5   |
| 13604626 | 32.0 | 2.8   |
| 13604630 | 1.8  | 15.1  |
| 13604631 | 23.0 | 15.1  |
| 13604633 | 20.6 | 32.8  |
| 13604634 | 47.5 | 13.7  |
| 13604635 | 51.9 | 14.9  |
| 13604636 | 35.0 | 1.9   |
| 13604637 | 34.4 | 23.6  |
| 13604638 | 36.3 | 294.4 |
| 13604639 | 65.9 | 3.9   |
| 13604640 | 49.1 | 10.1  |
| 13604641 | 32.6 | 10.9  |
| 13604642 | 17.2 | 1.3   |
| 13604643 | 2.9  | 4.7   |
| 13604644 | 56.0 | 17.8  |
| 13604645 | 33.3 | 45.3  |
| 13604646 | 39.6 | 14.8  |
| 13604648 | 14.5 | 11.4  |
| 13604650 | 47.8 | 56.2  |
| 13604653 | 33.9 | 7.1   |
| 13604654 | 47.9 | 15.2  |
| 13604657 | 50.9 | 13.5  |
| 13604659 | 0.6  | 59    |
| 13604662 | 0.2  | 1     |
| 13604664 | 74.3 | 10.2  |
| 13604666 | 1.7  | 163.4 |
| 13604668 | 61.7 | 17.2  |

|          |      |       |
|----------|------|-------|
| 13604671 | 1.6  | 4.8   |
| 13604673 | 71.4 | 2.3   |
| 13604675 | 75.6 | 21.1  |
| 13604677 | 12.1 | 1.8   |
| 13604685 | 66.7 | 13.5  |
| 13604692 | 1.4  | 80.2  |
| 13604695 | 57.6 | 10.5  |
| 13604698 | 29.1 | 16.1  |
| 13604699 | 55.8 | 1.6   |
| 13604700 | 70.4 | 7     |
| 13604701 | 18.4 | 7.9   |
| 13604702 | 4.5  | 18.9  |
| 13604704 | 7.5  | 1.2   |
| 13604705 | 39.7 | 29.9  |
| 13604706 | 45.0 | 5.4   |
| 13604708 | 31.1 | 4     |
| 13604710 | 38.2 | 2.5   |
| 13604711 | 69.9 | 57.3  |
| 13604714 | 48.8 | 13.6  |
| 13604718 | 51.8 | 1     |
| 13604719 | 28.7 | 1.5   |
| 13604720 | 38.9 | 1     |
| 13604727 | 10.6 | 3.2   |
| 13604729 | 40.2 | 9     |
| 13604730 | 67.4 | 11.9  |
| 13604732 | 39.6 | 63.6  |
| 13604735 | 29.7 | 38.4  |
| 13604736 | 21.0 | 3.8   |
| 13604737 | 26.3 | 1     |
| 13604738 | 0.8  | 7.1   |
| 13604739 | 22.2 | 14.8  |
| 13604742 | 8.8  | 2.3   |
| 13604745 | 11.4 | 25.1  |
| 13604752 | 61.7 | 20.2  |
| 13604753 | 43.7 | 16.7  |
| 13604757 | 4.1  | 64.3  |
| 13604758 | 33.5 | 68.9  |
| 13604763 | 3.0  | 4.5   |
| 13604768 | 9.5  | 1     |
| 13604775 | 2.6  | 1.5   |
| 13604776 | 7.4  | 6.3   |
| 13604777 | 6.5  | 9     |
| 13604780 | 22.8 | 2.6   |
| 13604785 | 33.6 | 5.7   |
| 13604789 | 20.3 | 1.2   |
| 13604790 | 31.5 | 31.1  |
| 13604792 | 35.8 | 37.9  |
| 13604795 | 55.8 | 12.6  |
| 13604796 | 52.4 | 7.3   |
| 13604797 | 44.3 | 8.8   |
| 13604801 | 13.5 | 5.7   |
| 13604805 | 75.9 | 35.5  |
| 13604808 | 70.6 | 5.6   |
| 13604810 | 40.5 | 1     |
| 13604811 | 0.8  | 6.2   |
| 13604812 | 70.1 | 198.9 |
| 13604814 | 0.7  | 26.1  |

|          |      |       |
|----------|------|-------|
| 13604816 | 3.4  | 1     |
| 13604818 | 3.9  | 1     |
| 13604819 | 0.6  | 14.6  |
| 13604822 | 62.4 | 4.5   |
| 13604824 | 13.8 | 123.2 |
| 13604826 | 76.8 | 56.2  |
| 13604827 | 15.7 | 16.7  |
| 13604837 | 53.0 | 21.1  |
| 13604839 | 49.9 | 10.1  |
| 13604843 | 59.4 | 31    |
| 13604845 | 27.5 | 15.8  |
| 13604847 | 28.0 | 3.2   |
| 13604848 | 52.7 | 44.5  |
| 13604854 | 43.1 | 12.1  |
| 13604855 | 77.2 | 17.6  |
| 13604856 | 50.9 | 26.8  |
| 13604857 | 47.7 | 4.6   |
| 13604858 | 41.6 | 8.5   |
| 13604859 | 38.4 | 33.9  |
| 13604860 | 7.8  | 9.1   |
| 13604861 | 26.4 | 7.9   |
| 13604863 | 15.5 | 67.9  |
| 13604864 | 58.6 | 2.5   |
| 13604867 | 71.3 | 140.4 |
| 13604868 | 55.9 | 39.9  |
| 13604870 | 12.6 | 1     |
| 13604872 | 33.5 | 18    |
| 13604874 | 30.9 | 4.2   |
| 13604875 | 45.7 | 52.5  |
| 13604876 | 36.0 | 15.2  |
| 13604877 | 73.2 | 9.9   |
| 13604882 | 48.5 | 1.6   |
| 13604883 | 17.2 | 1.7   |
| 13604885 | 22.4 | 91.5  |
| 13604887 | 2.4  | 1.9   |
| 13604889 | 43.9 | 1.3   |
| 13604890 | 38.6 | 64.9  |
| 13604894 | 54.6 | 101   |
| 13604895 | 32.0 | 1     |
| 13604897 | 26.5 | 3     |
| 13604898 | 38.8 | 29.6  |
| 13604899 | 52.3 | 9.1   |
| 13604901 | 74.2 | 27.4  |
| 13604914 | 62.2 | 12.6  |
| 13604915 | 76.0 | 2.8   |
| 13604918 | 37.9 | 4.4   |
| 13604920 | 6.4  | 4.8   |
| 13604924 | 14.9 | 4.7   |
| 13604926 | 0.7  | 30.2  |
| 13604928 | 66.1 | 8.6   |
| 13604932 | 20.5 | 1     |
| 13604934 | 15.6 | 36.1  |
| 13604937 | 24.3 | 13    |
| 13604940 | 20.5 | 10.4  |
| 13604946 | 36.5 | 1     |
| 13604947 | 34.8 | 7.1   |
| 13604948 | 28.8 | 23    |

|          |      |       |
|----------|------|-------|
| 13604952 | 29.0 | 6.4   |
| 13604954 | 22.4 | 1     |
| 13604957 | 27.6 | 1     |
| 13604958 | 37.1 | 5.1   |
| 13604960 | 51.8 | 9.2   |
| 13604961 | 62.0 | 3.7   |
| 13604962 | 36.9 | 26    |
| 13604964 | 41.2 | 12.6  |
| 13604965 | 36.4 | 18    |
| 13604966 | 52.8 | 12.9  |
| 13604968 | 60.6 | 4.9   |
| 13604970 | 30.8 | 8.2   |
| 13604973 | 39.1 | 4.6   |
| 13604974 | 63.7 | 20.6  |
| 13604977 | 31.1 | 53.2  |
| 13604984 | 36.9 | 16.1  |
| 13604985 | 53.2 | 1     |
| 13604986 | 32.7 | 23.7  |
| 13604988 | 16.7 | 28.7  |
| 13604990 | 74.5 | 20.3  |
| 13604992 | 5.8  | 1     |
| 13604995 | 29.3 | 37.9  |
| 13604997 | 36.9 | 1     |
| 13604999 | 42.9 | 24.2  |
| 13605000 | 73.0 | 4.4   |
| 13605001 | 73.0 | 12.7  |
| 13605009 | 74.7 | 5.3   |
| 13605012 | 72.2 | 10.6  |
| 13605015 | 70.7 | 22.8  |
| 13605017 | 1.9  | 1.3   |
| 13605018 | 56.2 | 61.3  |
| 13605020 | 66.7 | 132.5 |
| 13605022 | 74.5 | 129.1 |
| 13605024 | 77.5 | 120.7 |
| 13605027 | 77.4 | 7.4   |
| 13605032 | 68.5 | 59.5  |
| 13605035 | 67.6 | 23.1  |
| 13605047 | 8.0  | 23.7  |
| 13605048 | 10.5 | 24.2  |
| 13605053 | 7.1  | 1.5   |
| 13605057 | 15.1 | 51    |
| 13605058 | 0.9  | 23.1  |
| 13605060 | 5.6  | 21.7  |
| 13605062 | 11.8 | 4.1   |
| 13605070 | 65.8 | 7.8   |
| 13605071 | 58.4 | 1     |
| 13605072 | 45.1 | 80.8  |
| 13605073 | 16.9 | 1     |
| 13605076 | 40.0 | 15.4  |
| 13605077 | 45.5 | 9.8   |
| 13605082 | 22.4 | 7.6   |
| 13605084 | 4.5  | 4.4   |
| 13605086 | 26.1 | 10.2  |
| 13605089 | 24.2 | 8.8   |
| 13605091 | 33.1 | 3     |
| 13605092 | 17.7 | 8.9   |
| 13605093 | 26.8 | 6.5   |

|          |      |       |
|----------|------|-------|
| 13605094 | 60.2 | 13.2  |
| 13605096 | 14.6 | 5     |
| 13605098 | 55.6 | 17.1  |
| 13605100 | 52.0 | 21.3  |
| 13605102 | 59.1 | 32.9  |
| 13605104 | 36.0 | 1.8   |
| 13605106 | 71.6 | 28.5  |
| 13605108 | 75.7 | 10.3  |
| 13605110 | 0.5  | 25.1  |
| 13605114 | 75.1 | 12.3  |
| 13605117 | 9.2  | 47.6  |
| 13605118 | 7.9  | 11.1  |
| 13605120 | 51.3 | 20.6  |
| 13605124 | 3.0  | 5.2   |
| 13605135 | 7.7  | 192.4 |
| 13605136 | 23.4 | 1     |
| 13605137 | 3.8  | 1     |
| 13605138 | 76.4 | 204.8 |
| 13605142 | 6.6  | 2.1   |
| 13605143 | 5.6  | 1     |
| 13605147 | 20.7 | 2.8   |
| 13605148 | 52.7 | 33    |
| 13605149 | 73.5 | 1.1   |
| 13605151 | 59.7 | 3.1   |
| 13605153 | 73.0 | 48.9  |
| 13605154 | 73.8 | 26.1  |
| 13605155 | 1.0  | 352.4 |
| 13605157 | 56.4 | 102.9 |
| 13605159 | 56.7 | 1     |
| 13605161 | 0.3  | 55.1  |
| 13605163 | 73.3 | 12.7  |
| 13605167 | 48.2 | 39    |
| 13605168 | 57.8 | 12    |
| 13605171 | 26.7 | 10    |
| 13605175 | 19.2 | 36.8  |
| 13605176 | 22.2 | 12.8  |
| 13605177 | 34.4 | 92    |
| 13605181 | 36.4 | 46.3  |
| 13605183 | 22.9 | 14.5  |
| 13605187 | 33.5 | 6.6   |
| 13605192 | 39.7 | 53.7  |
| 13605194 | 24.4 | 1.9   |
| 13605195 | 18.3 | 3.2   |
| 13605197 | 19.6 | 11.9  |
| 13605199 | 65.9 | 6.2   |
| 13605210 | 64.9 | 21    |
| 13605213 | 77.6 | 3.8   |
| 13605215 | 2.6  | 1     |
| 13605216 | 68.5 | 168.3 |
| 13605217 | 2.9  | 1.1   |
| 13605226 | 61.0 | 6     |
| 13605228 | 10.3 | 23.8  |
| 13605229 | 11.6 | 1     |
| 13605230 | 4.7  | 135.5 |
| 13605233 | 4.4  | 55.5  |
| 13605234 | 64.8 | 31.9  |
| 13605241 | 17.0 | 10.8  |

|          |      |       |
|----------|------|-------|
| 13605242 | 14.0 | 3     |
| 13605244 | 62.9 | 34.9  |
| 13605246 | 27.4 | 9.2   |
| 13605247 | 47.3 | 1     |
| 13605249 | 44.1 | 25.4  |
| 13605251 | 38.8 | 2     |
| 13605252 | 51.8 | 191.2 |
| 13605253 | 3.2  | 1     |
| 13605256 | 22.8 | 16.8  |
| 13605257 | 56.4 | 26.3  |
| 13605263 | 0.3  | 9.5   |
| 13605265 | 20.8 | 24.2  |
| 13605269 | 17.0 | 3.7   |
| 13605272 | 48.1 | 8.2   |
| 13605273 | 32.0 | 96.9  |
| 13605274 | 8.4  | 5.4   |
| 13605275 | 34.7 | 48.6  |
| 13605279 | 21.3 | 13.6  |
| 13605284 | 73.8 | 18.9  |
| 13605287 | 11.4 | 1     |
| 13605291 | 0.2  | 8.4   |
| 13605292 | 0.3  | 9.7   |
| 13605294 | 74.6 | 7.8   |
| 13605301 | 4.4  | 20.5  |
| 13605304 | 4.9  | 1.9   |
| 13605306 | 71.3 | 27.7  |
| 13605309 | 15.0 | 339.8 |
| 13605311 | 48.6 | 84.6  |
| 13605313 | 0.2  | 1     |
| 13605314 | 33.7 | 71.1  |
| 13605319 | 39.5 | 100.2 |
| 13605320 | 48.2 | 7.1   |
| 13605323 | 12.2 | 1.6   |
| 13605325 | 32.5 | 1.2   |
| 13605326 | 57.0 | 42.7  |
| 13605328 | 20.3 | 1.9   |
| 13605335 | 35.7 | 3.4   |
| 13605336 | 58.6 | 17.6  |
| 13605338 | 73.1 | 1     |
| 13605343 | 12.4 | 9.1   |
| 13605344 | 67.2 | 66    |
| 13605345 | 0.9  | 8.8   |
| 13605346 | 1.4  | 134.9 |
| 13605352 | 6.8  | 195.7 |
| 13605353 | 58.1 | 65.2  |
| 13605358 | 28.1 | 48.5  |
| 13605359 | 52.0 | 3.1   |
| 13605368 | 71.2 | 42.9  |
| 13605371 | 0.3  | 5.2   |
| 13605373 | 37.4 | 44.2  |
| 13605375 | 73.9 | 23.4  |
| 13605376 | 0.4  | 126   |
| 13605378 | 0.7  | 10.8  |
| 13605381 | 75.0 | 12.7  |
| 13605385 | 3.3  | 1     |
| 13605386 | 3.0  | 1     |
| 13605387 | 1.0  | 63.6  |



|          |      |       |
|----------|------|-------|
| 13605389 | 79.8 | 3.6   |
| 13605391 | 74.0 | 1.5   |
| 13605392 | 75.8 | 6.7   |
| 13605393 | 15.7 | 34.9  |
| 13605394 | 64.4 | 19.6  |
| 13605395 | 62.1 | 1.4   |
| 13605396 | 62.2 | 33.5  |
| 13605398 | 4.9  | 23.3  |
| 13605403 | 61.6 | 41.1  |
| 13605404 | 14.4 | 3.4   |
| 13605405 | 8.0  | 9     |
| 13605406 | 41.9 | 6     |
| 13605408 | 16.1 | 25.3  |
| 13605410 | 64.4 | 98.4  |
| 13605412 | 35.4 | 25.8  |
| 13605416 | 36.9 | 10    |
| 13605419 | 50.3 | 5     |
| 13605424 | 38.1 | 3.3   |
| 13605425 | 34.5 | 219.6 |
| 13605427 | 69.2 | 11.7  |
| 13605429 | 37.0 | 8.2   |
| 13605430 | 60.1 | 6.9   |
| 13605432 | 47.0 | 1.1   |
| 13605437 | 8.9  | 28.3  |
| 13605439 | 64.8 | 3.4   |
| 13605442 | 74.5 | 8.5   |
| 13605444 | 29.4 | 3.7   |
| 13605446 | 78.1 | 12.5  |
| 13605457 | 35.7 | 16    |
| 13605459 | 66.9 | 3     |
| 13605462 | 56.7 | 5.6   |
| 13605463 | 53.3 | 53.2  |
| 13605465 | 0.3  | 1     |
| 13605473 | 38.4 | 32.4  |
| 13605474 | 2.4  | 9     |
| 13605475 | 34.5 | 3.6   |
| 13605476 | 2.8  | 1.1   |
| 13605477 | 0.6  | 20.3  |
| 13605479 | 70.9 | 33.7  |
| 13605480 | 25.8 | 2.6   |
| 13605482 | 76.7 | 46.1  |
| 13605483 | 15.5 | 21.2  |
| 13605484 | 79.0 | 4.9   |
| 13605489 | 4.3  | 1     |
| 13605494 | 12.9 | 1.5   |
| 13605495 | 11.0 | 1     |
| 13605498 | 68.1 | 1     |
| 13605502 | 5.3  | 2.8   |
| 13605505 | 8.9  | 18.2  |
| 13605507 | 6.1  | 1.3   |
| 13605509 | 12.0 | 2.2   |
| 13605510 | 5.3  | 1     |
| 13605511 | 8.1  | 1.3   |
| 13605513 | 9.8  | 3.8   |
| 13605514 | 77.8 | 54.8  |
| 13605516 | 13.6 | 1.2   |
| 13605517 | 65.5 | 17.4  |

|          |      |       |
|----------|------|-------|
| 13605518 | 43.3 | 51.2  |
| 13605519 | 56.5 | 10.2  |
| 13605520 | 18.7 | 1     |
| 13605521 | 37.7 | 1.2   |
| 13605530 | 32.4 | 19.7  |
| 13605533 | 58.2 | 2.1   |
| 13605534 | 33.7 | 2.4   |
| 13605536 | 30.3 | 5     |
| 13605537 | 32.0 | 1.1   |
| 13605540 | 36.8 | 7.9   |
| 13605542 | 74.5 | 25.9  |
| 13605544 | 75.1 | 59    |
| 13605548 | 46.8 | 23.5  |
| 13605551 | 0.7  | 18.9  |
| 13605553 | 0.7  | 17.4  |
| 13605554 | 72.6 | 3.3   |
| 13605558 | 60.9 | 3.1   |
| 13605559 | 62.6 | 13.2  |
| 13605561 | 77.0 | 3.8   |
| 13605563 | 77.5 | 63.5  |
| 13605564 | 8.9  | 17.4  |
| 13605568 | 15.0 | 38.1  |
| 13605569 | 3.4  | 1     |
| 13605572 | 4.6  | 1.3   |
| 13605573 | 4.1  | 1.2   |
| 13605574 | 37.2 | 15.2  |
| 13605577 | 60.9 | 140.9 |
| 13605578 | 65.8 | 10.8  |
| 13605583 | 13.0 | 31.3  |
| 13605588 | 75.0 | 18.3  |
| 13605589 | 40.4 | 1     |
| 13605590 | 0.9  | 26.3  |
| 13605593 | 60.0 | 18.8  |
| 13605595 | 39.7 | 1.3   |
| 13605596 | 39.6 | 11    |
| 13605597 | 60.9 | 29.7  |
| 13605598 | 43.5 | 18.1  |
| 13605599 | 56.8 | 37.8  |
| 13605602 | 19.5 | 4.7   |
| 13605607 | 4.6  | 40.5  |
| 13605608 | 33.9 | 13.5  |
| 13605609 | 40.8 | 4.3   |
| 13605611 | 34.0 | 7     |
| 13605612 | 35.1 | 6.6   |
| 13605615 | 32.0 | 7.8   |
| 13605616 | 29.7 | 5.3   |
| 13605617 | 24.0 | 38.9  |
| 13605620 | 27.6 | 1     |
| 13605623 | 55.0 | 16    |
| 13605627 | 53.0 | 4     |
| 13605628 | 20.0 | 1     |
| 13605630 | 13.4 | 1.6   |
| 13605631 | 69.2 | 4.3   |
| 13605632 | 6.3  | 11.9  |
| 13605634 | 60.7 | 5.3   |
| 13605635 | 0.9  | 6.5   |
| 13605636 | 66.3 | 2.5   |

|          |      |       |
|----------|------|-------|
| 13605640 | 9.8  | 6.3   |
| 13605642 | 9.3  | 4.3   |
| 13605644 | 62.6 | 11.5  |
| 13605645 | 63.2 | 19.9  |
| 13605646 | 6.7  | 1.1   |
| 13605648 | 57.7 | 17.9  |
| 13605652 | 67.9 | 5.1   |
| 13605653 | 0.8  | 28.5  |
| 13605654 | 1.0  | 584.5 |
| 13605655 | 4.0  | 50.6  |
| 13605656 | 77.3 | 11.5  |
| 13605657 | 30.2 | 6.8   |
| 13605658 | 9.5  | 1.1   |
| 13605659 | 11.0 | 50    |
| 13605660 | 5.4  | 3.9   |
| 13605662 | 69.7 | 14.5  |
| 13605663 | 2.1  | 8.5   |
| 13605665 | 21.4 | 7.7   |
| 13605675 | 54.4 | 1     |
| 13605676 | 31.6 | 60.8  |
| 13605677 | 35.6 | 3.1   |
| 13605681 | 28.1 | 7.4   |
| 13605683 | 55.5 | 1.9   |
| 13605684 | 51.6 | 19.8  |
| 13605689 | 21.5 | 2.3   |
| 13605694 | 41.8 | 3.3   |
| 13605695 | 73.0 | 52.1  |
| 13605696 | 71.8 | 11.1  |
| 13605698 | 53.4 | 4.9   |
| 13605699 | 1.0  | 185.4 |
| 13605703 | 40.9 | 4.8   |
| 13605704 | 30.4 | 74.5  |
| 13605707 | 38.2 | 28.7  |
| 13605708 | 0.5  | 139.6 |
| 13605710 | 25.3 | 22.9  |
| 13605712 | 0.6  | 12.9  |
| 13605713 | 3.4  | 1     |
| 13605714 | 51.1 | 168   |
| 13605715 | 15.9 | 1.1   |
| 13605716 | 26.4 | 14.4  |
| 13605718 | 66.2 | 40.3  |
| 13605727 | 2.1  | 2.6   |
| 13605730 | 35.0 | 32.4  |
| 13605733 | 71.7 | 29.3  |
| 13605736 | 62.9 | 22.3  |
| 13605737 | 60.6 | 15.7  |
| 13605747 | 13.8 | 48    |
| 13605750 | 10.7 | 1     |
| 13605751 | 39.3 | 14.9  |
| 13605760 | 11.1 | 14.6  |
| 13605761 | 7.8  | 43.6  |
| 13605764 | 19.3 | 2.2   |
| 13605768 | 47.0 | 3.8   |
| 13605770 | 35.8 | 55.7  |
| 13605779 | 33.2 | 68.9  |
| 13605781 | 24.3 | 1     |
| 13605791 | 33.2 | 20.3  |

|          |      |       |
|----------|------|-------|
| 13605793 | 54.1 | 16.8  |
| 13605794 | 71.8 | 115.8 |
| 13605795 | 32.5 | 12.2  |
| 13605796 | 1.7  | 15.9  |
| 13605799 | 36.8 | 114.5 |
| 13605801 | 51.8 | 1.9   |
| 13605802 | 38.8 | 5.1   |
| 13605803 | 44.7 | 35.8  |
| 13605804 | 27.7 | 12.6  |
| 13605806 | 27.0 | 86.7  |
| 13605807 | 38.4 | 25.4  |
| 13605808 | 58.1 | 36.9  |
| 13605814 | 41.1 | 87    |
| 13605818 | 63.5 | 24    |
| 13605820 | 36.1 | 16.2  |
| 13605835 | 17.9 | 1     |
| 13605848 | 4.6  | 28.8  |
| 13605851 | 57.5 | 19.5  |
| 13605854 | 69.1 | 29.1  |
| 13605859 | 6.9  | 522.2 |
| 13605866 | 6.5  | 2.6   |
| 13605871 | 2.4  | 31.5  |
| 13605874 | 3.7  | 1     |
| 13605876 | 58.9 | 7.4   |
| 13605877 | 56.1 | 12    |
| 13605886 | 76.2 | 3.2   |
| 13605892 | 72.9 | 9.4   |
| 13605893 | 3.1  | 14.2  |
| 13605894 | 76.8 | 19.9  |
| 13605900 | 41.5 | 3.2   |
| 13605902 | 37.5 | 4.4   |
| 13605905 | 45.7 | 3.8   |
| 13605910 | 31.1 | 5.9   |
| 13605914 | 17.7 | 17.8  |
| 13605925 | 35.1 | 44.1  |
| 13605927 | 59.7 | 7.1   |
| 13605930 | 62.4 | 6     |
| 13605931 | 42.7 | 7     |
| 13605944 | 7.4  | 8.1   |
| 13605948 | 60.9 | 11.2  |
| 13605955 | 68.9 | 1.2   |
| 13605961 | 58.2 | 16.5  |
| 13605965 | 42.2 | 138.4 |
| 13605967 | 53.2 | 24.8  |
| 13605973 | 40.8 | 23.8  |
| 13605977 | 4.3  | 10.8  |
| 13605982 | 5.4  | 7.1   |
| 13605988 | 75.9 | 63.4  |
| 13605991 | 70.8 | 59.2  |
| 13605996 | 20.8 | 19.5  |
| 13605997 | 70.1 | 23.1  |
| 13606005 | 40.2 | 2.7   |
| 13606014 | 51.8 | 15.4  |
| 13606018 | 28.8 | 10.8  |
| 13606019 | 32.3 | 57.3  |
| 13606020 | 35.2 | 42.7  |
| 13606027 | 62.7 | 160.7 |

|          |      |       |
|----------|------|-------|
| 13606030 | 70.7 | 20    |
| 13606032 | 39.0 | 14.1  |
| 13606034 | 64.1 | 27.5  |
| 13606037 | 71.9 | 1.2   |
| 13606040 | 65.3 | 5.8   |
| 13606041 | 65.9 | 3.2   |
| 13606042 | 67.9 | 22.8  |
| 13606044 | 70.0 | 37.3  |
| 13606046 | 61.3 | 64.9  |
| 13606049 | 73.6 | 17.5  |
| 13606051 | 0.3  | 117.7 |
| 13606054 | 72.1 | 93.3  |
| 13606057 | 12.2 | 27.1  |
| 13606061 | 34.5 | 9.3   |
| 13606064 | 13.4 | 17.8  |
| 13606066 | 37.4 | 6.2   |
| 13606067 | 37.4 | 6.2   |
| 13606068 | 21.6 | 33.9  |
| 13606071 | 29.7 | 51.3  |
| 13606072 | 27.9 | 7.5   |
| 13606073 | 21.2 | 1.2   |
| 13606079 | 20.9 | 70.6  |
| 13606082 | 16.9 | 12.5  |
| 13606084 | 24.8 | 17.4  |
| 13606086 | 23.7 | 1     |
| 13606087 | 49.0 | 18.2  |
| 13606092 | 60.3 | 4.4   |
| 13606101 | 13.4 | 1     |
| 13606103 | 27.2 | 6.9   |
| 13606104 | 45.2 | 48.3  |
| 13606105 | 7.6  | 16.5  |
| 13606110 | 7.6  | 54.7  |
| 13606112 | 45.1 | 13.4  |
| 13606113 | 23.4 | 8.5   |
| 13606116 | 25.2 | 36.6  |
| 13606118 | 16.5 | 11.3  |
| 13606119 | 56.2 | 21.8  |
| 13606120 | 47.1 | 7.4   |
| 13606124 | 36.9 | 4     |
| 13606125 | 74.4 | 108.6 |
| 13606126 | 65.8 | 10    |
| 13606127 | 10.7 | 6.2   |
| 13606134 | 7.7  | 22.6  |
| 13606136 | 58.5 | 133.4 |
| 13606137 | 48.4 | 40.5  |
| 13606138 | 52.3 | 31.9  |
| 13606139 | 62.5 | 52.3  |
| 13606142 | 2.9  | 2.7   |
| 13606143 | 2.9  | 2.8   |
| 13606144 | 14.6 | 13.3  |
| 13606146 | 3.6  | 4.1   |
| 13606148 | 7.6  | 13.2  |
| 13606152 | 11.9 | 11.4  |
| 13606154 | 61.0 | 6.6   |
| 13606156 | 1.3  | 47.4  |
| 13606157 | 0.9  | 33.2  |
| 13606158 | 15.1 | 1     |

|          |      |       |
|----------|------|-------|
| 13606164 | 7.6  | 7.5   |
| 13606169 | 37.2 | 13.3  |
| 13606170 | 47.8 | 19.9  |
| 13606171 | 61.0 | 8.6   |
| 13606172 | 41.3 | 9.3   |
| 13606174 | 56.9 | 67.1  |
| 13606178 | 34.0 | 17.7  |
| 13606182 | 42.7 | 63.7  |
| 13606186 | 2.5  | 2.6   |
| 13606190 | 54.3 | 8.7   |
| 13606192 | 36.5 | 12.9  |
| 13606193 | 32.3 | 31.8  |
| 13606194 | 39.4 | 8.5   |
| 13606195 | 37.9 | 1.4   |
| 13606196 | 28.8 | 15.1  |
| 13606201 | 3.0  | 2.1   |
| 13606204 | 23.2 | 23.4  |
| 13606205 | 29.7 | 28.2  |
| 13606207 | 39.3 | 9.1   |
| 13606217 | 20.0 | 2.2   |
| 13606225 | 34.1 | 4.6   |
| 13606240 | 2.1  | 53.3  |
| 13606242 | 33.9 | 23.9  |
| 13606245 | 79.3 | 17.5  |
| 13606248 | 57.6 | 19.2  |
| 13606249 | 0.7  | 20.8  |
| 13606250 | 59.4 | 2.7   |
| 13606256 | 12.9 | 56    |
| 13606258 | 64.6 | 40.9  |
| 13606259 | 70.5 | 3.3   |
| 13606261 | 7.2  | 2.1   |
| 13606262 | 64.7 | 26.2  |
| 13606263 | 14.1 | 145   |
| 13606265 | 16.6 | 4.7   |
| 13606267 | 23.4 | 1     |
| 13606268 | 41.6 | 12.5  |
| 13606270 | 19.8 | 325.6 |
| 13606271 | 24.3 | 1     |
| 13606272 | 43.4 | 2.2   |
| 13606274 | 21.8 | 65.7  |
| 13606275 | 21.3 | 19    |
| 13606279 | 29.8 | 3.1   |
| 13606282 | 55.2 | 28.1  |
| 13606283 | 58.9 | 98.6  |
| 13606285 | 31.0 | 3.8   |
| 13606286 | 39.8 | 1     |
| 13606287 | 52.6 | 25.2  |
| 13606292 | 36.4 | 14.9  |
| 13606293 | 39.9 | 1.4   |
| 13606295 | 43.5 | 6.7   |
| 13606298 | 43.1 | 9.8   |
| 13606299 | 9.1  | 5.1   |
| 13606300 | 49.5 | 10    |
| 13606301 | 12.2 | 18.3  |
| 13606302 | 7.7  | 2.4   |
| 13606306 | 0.2  | 18.7  |
| 13606311 | 47.4 | 21.5  |

|          |      |       |
|----------|------|-------|
| 13606315 | 0.4  | 41.5  |
| 13606316 | 17.1 | 4.4   |
| 13606317 | 52.3 | 7.2   |
| 13606318 | 33.7 | 11.8  |
| 13606320 | 43.3 | 42.1  |
| 13606321 | 34.4 | 9.1   |
| 13606322 | 36.5 | 22.2  |
| 13606329 | 0.2  | 2.7   |
| 13606330 | 66.7 | 51.3  |
| 13606333 | 2.3  | 5.8   |
| 13606334 | 14.7 | 34.3  |
| 13606336 | 66.6 | 3.2   |
| 13606337 | 58.0 | 10.5  |
| 13606339 | 54.4 | 1     |
| 13606344 | 64.6 | 10    |
| 13606348 | 7.6  | 12.4  |
| 13606350 | 39.6 | 4.7   |
| 13606351 | 78.5 | 1.8   |
| 13606352 | 1.2  | 123   |
| 13606353 | 9.3  | 1     |
| 13606355 | 10.5 | 1.9   |
| 13606356 | 9.4  | 1     |
| 13606361 | 65.0 | 7.3   |
| 13606362 | 69.3 | 6.7   |
| 13606363 | 79.7 | 24.6  |
| 13606364 | 42.3 | 3     |
| 13606369 | 27.6 | 27.6  |
| 13606370 | 60.7 | 16.4  |
| 13606372 | 41.0 | 8.3   |
| 13606374 | 20.6 | 1     |
| 13606375 | 43.8 | 31.3  |
| 13606376 | 37.9 | 1     |
| 13606378 | 58.6 | 68.4  |
| 13606380 | 38.7 | 8.3   |
| 13606382 | 46.3 | 25.2  |
| 13606384 | 48.5 | 21.2  |
| 13606385 | 21.9 | 41    |
| 13606392 | 35.2 | 114.1 |
| 13606393 | 31.9 | 1.9   |
| 13606396 | 53.3 | 19    |
| 13606401 | 72.1 | 10.9  |
| 13606402 | 72.5 | 12.7  |
| 13606404 | 75.2 | 4.3   |
| 13606405 | 3.4  | 1     |
| 13606406 | 6.4  | 5.3   |
| 13606409 | 74.9 | 2.9   |
| 13606411 | 63.9 | 29.4  |
| 13606413 | 72.5 | 2.4   |
| 13606416 | 75.3 | 20.1  |
| 13606420 | 16.6 | 1     |
| 13606421 | 0.9  | 10.1  |
| 13606422 | 64.5 | 42    |
| 13606424 | 16.3 | 8.3   |
| 13606427 | 14.1 | 31    |
| 13606432 | 19.3 | 130.6 |
| 13606434 | 46.1 | 2.3   |
| 13606435 | 33.9 | 3.2   |

|          |      |       |
|----------|------|-------|
| 13606436 | 21.2 | 5     |
| 13606437 | 27.5 | 1     |
| 13606442 | 14.5 | 1.1   |
| 13606444 | 41.7 | 75.5  |
| 13606449 | 0.8  | 22.3  |
| 13606450 | 49.5 | 1.1   |
| 13606453 | 44.3 | 57    |
| 13606456 | 55.6 | 15.6  |
| 13606457 | 35.1 | 16.2  |
| 13606459 | 29.6 | 65    |
| 13606461 | 45.3 | 13.9  |
| 13606464 | 24.8 | 15.7  |
| 13606467 | 34.8 | 19.1  |
| 13606469 | 23.6 | 7.2   |
| 13606470 | 31.6 | 11.8  |
| 13606473 | 39.6 | 5.5   |
| 13606477 | 0.1  | 70.4  |
| 13606478 | 59.3 | 21.2  |
| 13606481 | 12.3 | 1     |
| 13606483 | 8.6  | 1     |
| 13606485 | 31.3 | 33.2  |
| 13606488 | 35.6 | 36.5  |
| 13606489 | 55.9 | 43.7  |
| 13606491 | 77.0 | 235.7 |
| 13606492 | 36.8 | 22.4  |
| 13606494 | 28.3 | 6.5   |
| 13606497 | 36.8 | 45.1  |
| 13606498 | 11.8 | 13.9  |
| 13606499 | 25.9 | 49    |
| 13606501 | 58.8 | 30.7  |
| 13606502 | 0.6  | 17.9  |
| 13606503 | 29.9 | 218.8 |
| 13606504 | 32.9 | 786.4 |
| 13606506 | 20.5 | 13.3  |
| 13606509 | 69.1 | 32.6  |
| 13606513 | 75.8 | 34.6  |
| 13606516 | 60.4 | 47.3  |
| 13606518 | 65.7 | 68.9  |
| 13606519 | 0.3  | 21.2  |
| 13606531 | 5.6  | 6.3   |
| 13606534 | 49.6 | 3.2   |
| 13606536 | 66.9 | 2.4   |
| 13606539 | 43.6 | 23.1  |
| 13606540 | 75.7 | 46.7  |
| 13606542 | 7.5  | 3     |
| 13606544 | 15.3 | 6.8   |
| 13606546 | 75.7 | 18.7  |
| 13606547 | 72.6 | 22.8  |
| 13606548 | 10.8 | 1     |
| 13606549 | 51.4 | 22.4  |
| 13606552 | 62.8 | 1     |
| 13606556 | 1.1  | 192.6 |
| 13606557 | 37.4 | 61.9  |
| 13606559 | 52.8 | 242.7 |
| 13606562 | 22.3 | 25.6  |
| 13606563 | 46.5 | 3.6   |
| 13606566 | 44.4 | 7     |



|          |      |       |
|----------|------|-------|
| 13606567 | 48.9 | 5.4   |
| 13606571 | 54.6 | 34.8  |
| 13606575 | 57.3 | 10.9  |
| 13606579 | 5.7  | 2.7   |
| 13606582 | 19.5 | 2.4   |
| 13606584 | 28.5 | 40.9  |
| 13606586 | 34.4 | 1.9   |
| 13606587 | 42.1 | 59.4  |
| 13606588 | 20.3 | 32.2  |
| 13606590 | 6.7  | 51.9  |
| 13606591 | 41.0 | 6     |
| 13606592 | 28.1 | 2.9   |
| 13606594 | 75.8 | 1     |
| 13606596 | 0.4  | 35.5  |
| 13606597 | 70.0 | 8.5   |
| 13606598 | 63.6 | 10.9  |
| 13606599 | 70.4 | 1.5   |
| 13606600 | 8.6  | 31    |
| 13606603 | 65.9 | 10.3  |
| 13606605 | 32.7 | 2.4   |
| 13606607 | 71.6 | 5.8   |
| 13606608 | 68.2 | 11.6  |
| 13606611 | 69.4 | 33.3  |
| 13606612 | 4.3  | 6.6   |
| 13606613 | 61.3 | 48.2  |
| 13606614 | 4.7  | 2.4   |
| 13606616 | 7.4  | 11.3  |
| 13606619 | 2.3  | 228.3 |
| 13606621 | 44.0 | 18.7  |
| 13606622 | 15.3 | 3.5   |
| 13606628 | 37.2 | 5.1   |
| 13606631 | 26.6 | 15.4  |
| 13606634 | 38.5 | 27.7  |
| 13606636 | 26.6 | 4.9   |
| 13606643 | 79.8 | 47    |
| 13606644 | 62.4 | 13.2  |
| 13606647 | 60.7 | 6.7   |
| 13606648 | 2.1  | 5.6   |
| 13606649 | 16.4 | 1     |
| 13606650 | 3.8  | 1     |
| 13606652 | 3.6  | 1     |
| 13606653 | 63.4 | 10.9  |
| 13606658 | 48.3 | 20.5  |
| 13606660 | 49.0 | 8.2   |
| 13606661 | 0.2  | 4.7   |
| 13606663 | 52.3 | 133   |
| 13606664 | 50.0 | 7.7   |
| 13606665 | 50.5 | 13.5  |
| 13606666 | 0.7  | 22.4  |
| 13606669 | 33.8 | 18.3  |
| 13606673 | 57.0 | 8.9   |
| 13606675 | 16.3 | 1     |
| 13606678 | 20.2 | 195.1 |
| 13606683 | 18.4 | 27.8  |
| 13606684 | 51.6 | 44.1  |
| 13606686 | 20.6 | 4.4   |
| 13606688 | 6.9  | 5.7   |

|          |      |       |
|----------|------|-------|
| 13606689 | 27.8 | 2.4   |
| 13606690 | 4.9  | 25.7  |
| 13606699 | 60.1 | 20.2  |
| 13606704 | 70.5 | 39.8  |
| 13606706 | 60.7 | 7.1   |
| 13606708 | 71.8 | 5.3   |
| 13606713 | 70.1 | 10.4  |
| 13606714 | 2.1  | 9.9   |
| 13606715 | 41.6 | 4.9   |
| 13606717 | 22.6 | 15.4  |
| 13606718 | 63.9 | 45    |
| 13606719 | 72.1 | 10.4  |
| 13606725 | 12.6 | 1.3   |
| 13606726 | 69.0 | 46.2  |
| 13606731 | 15.0 | 3.8   |
| 13606732 | 45.1 | 46.4  |
| 13606733 | 13.4 | 38.7  |
| 13606735 | 31.4 | 2.7   |
| 13606737 | 49.7 | 25.3  |
| 13606738 | 55.9 | 57.3  |
| 13606741 | 25.2 | 1     |
| 13606742 | 27.4 | 4     |
| 13606744 | 37.5 | 1     |
| 13606747 | 52.0 | 12    |
| 13606748 | 66.0 | 13.1  |
| 13606749 | 34.6 | 120.2 |
| 13606756 | 14.3 | 2.3   |
| 13606761 | 57.4 | 4.3   |
| 13606763 | 13.3 | 3     |
| 13606766 | 38.4 | 7.6   |
| 13606769 | 53.0 | 8.5   |
| 13606772 | 64.1 | 20.4  |
| 13606773 | 69.2 | 107.4 |
| 13606774 | 56.1 | 9.8   |
| 13606775 | 25.4 | 25.6  |
| 13606781 | 35.9 | 2.6   |
| 13606784 | 4.6  | 1.9   |
| 13606787 | 1.7  | 114.9 |
| 13606788 | 37.0 | 34.3  |
| 13606791 | 20.0 | 2.3   |
| 13606792 | 21.1 | 1.7   |
| 13606794 | 21.5 | 2.6   |
| 13606795 | 7.6  | 3.2   |
| 13606797 | 13.5 | 7.9   |
| 13606800 | 41.9 | 11.1  |
| 13606802 | 4.7  | 29    |
| 13606805 | 9.5  | 1     |
| 13606807 | 65.6 | 15    |
| 13606808 | 36.5 | 1.2   |
| 13606809 | 77.6 | 4.3   |
| 13606810 | 69.7 | 107.5 |
| 13606812 | 71.9 | 33.8  |
| 13606813 | 71.8 | 13.8  |
| 13606814 | 69.7 | 10.1  |
| 13606818 | 32.4 | 1.2   |
| 13606823 | 21.8 | 2.3   |
| 13606826 | 41.5 | 11.5  |

|          |      |       |
|----------|------|-------|
| 13606828 | 49.3 | 92    |
| 13606829 | 18.3 | 2.5   |
| 13606832 | 45.4 | 5.7   |
| 13606835 | 59.6 | 2.7   |
| 13606837 | 33.8 | 5     |
| 13606838 | 35.1 | 5.6   |
| 13606844 | 21.2 | 3     |
| 13606845 | 59.7 | 60    |
| 13606847 | 30.7 | 11    |
| 13606850 | 46.6 | 23.6  |
| 13606851 | 67.5 | 4.7   |
| 13606855 | 20.7 | 23.6  |
| 13606860 | 53.4 | 3.6   |
| 13606862 | 32.8 | 11.7  |
| 13606863 | 33.1 | 114.9 |
| 13606865 | 27.0 | 6.7   |
| 13606866 | 65.3 | 62.2  |
| 13606868 | 1.2  | 93.7  |
| 13606871 | 78.8 | 18.2  |
| 13606873 | 74.9 | 51.7  |
| 13606874 | 68.2 | 12.3  |
| 13606875 | 60.7 | 10.7  |
| 13606876 | 6.0  | 4.3   |
| 13606878 | 69.7 | 77.5  |
| 13606881 | 3.9  | 95    |
| 13606882 | 0.3  | 26    |
| 13606883 | 59.3 | 2.4   |
| 13606884 | 65.2 | 8     |
| 13606886 | 79.4 | 10.8  |
| 13606887 | 48.0 | 75.4  |
| 13606888 | 32.8 | 71.4  |
| 13606889 | 42.1 | 10.6  |
| 13606892 | 0.4  | 29    |
| 13606893 | 24.6 | 1     |
| 13606894 | 51.9 | 3.1   |
| 13606897 | 35.2 | 12.5  |
| 13606898 | 75.9 | 99    |
| 13606899 | 78.6 | 41.3  |
| 13606901 | 72.0 | 7.9   |
| 13606905 | 63.0 | 4.7   |
| 13606906 | 71.6 | 12.4  |
| 13606910 | 61.6 | 6.9   |
| 13606911 | 30.2 | 17.4  |
| 13606914 | 76.8 | 24.7  |
| 13606915 | 71.3 | 12.5  |
| 13606916 | 55.4 | 191.2 |
| 13606918 | 32.4 | 50.3  |
| 13606919 | 2.8  | 1.1   |
| 13606922 | 23.3 | 2     |
| 13606924 | 29.6 | 28    |
| 13606925 | 50.7 | 5.2   |
| 13606929 | 42.9 | 1.1   |
| 13606930 | 60.0 | 12.5  |
| 13606931 | 53.2 | 15    |
| 13606932 | 18.0 | 10.4  |
| 13606933 | 75.0 | 12.5  |
| 13606935 | 25.3 | 4.6   |

|          |      |       |
|----------|------|-------|
| 13606936 | 27.2 | 7.6   |
| 13606938 | 12.7 | 49.2  |
| 13606940 | 1.0  | 8.2   |
| 13606941 | 1.1  | 115.2 |
| 13606944 | 62.2 | 1.2   |
| 13606946 | 4.7  | 4.6   |
| 13606954 | 12.4 | 1     |
| 13606955 | 2.3  | 13.2  |
| 13606960 | 76.8 | 40.3  |
| 13606964 | 70.8 | 1     |
| 13606966 | 0.5  | 20.9  |
| 13606969 | 4.8  | 1.5   |
| 13606972 | 0.8  | 1     |
| 13606973 | 64.0 | 2.9   |
| 13606976 | 25.4 | 4.3   |
| 13606977 | 26.0 | 35.4  |
| 13606978 | 1.0  | 120.7 |
| 13606979 | 56.2 | 4.2   |
| 13606983 | 35.8 | 32.1  |
| 13606985 | 59.0 | 54.6  |
| 13606988 | 21.2 | 4.7   |
| 13606989 | 57.9 | 174.6 |
| 13606991 | 20.9 | 19.1  |
| 13606993 | 26.2 | 39.7  |
| 13606996 | 29.5 | 35.7  |
| 13607000 | 39.1 | 14    |
| 13607001 | 45.8 | 10.5  |
| 13607110 | 2.5  | 3.6   |
| 13607119 | 27.9 | 1.4   |
| 13607123 | 59.1 | 1.5   |
| 13607124 | 70.1 | 139.6 |
| 13607125 | 38.2 | 13.4  |
| 13607126 | 2.0  | 28.5  |
| 13607130 | 23.5 | 102   |
| 13607136 | 42.5 | 17.2  |
| 13607295 | 61.1 | 45.2  |
| 13607297 | 67.9 | 25.7  |
| 13607298 | 0.9  | 9.1   |
| 13607300 | 1.3  | 61.8  |
| 13607301 | 66.4 | 32    |
| 13607303 | 0.2  | 2.7   |
| 13607304 | 0.5  | 22.2  |
| 13607305 | 45.0 | 6.4   |
| 13607306 | 5.4  | 1.1   |
| 13607307 | 0.2  | 1     |
| 13607308 | 69.0 | 10.7  |
| 13607309 | 0.2  | 2.2   |
| 13607311 | 0.8  | 9.5   |
| 13607312 | 52.3 | 22.5  |
| 13607315 | 2.4  | 26    |
| 13607317 | 68.7 | 23.8  |
| 13607319 | 0.6  | 14.8  |
| 13607322 | 12.2 | 1     |
| 13607324 | 31.3 | 4     |
| 13607327 | 0.5  | 71.5  |
| 13607328 | 11.4 | 61.2  |
| 13607329 | 7.0  | 20.6  |

|          |      |       |
|----------|------|-------|
| 13607331 | 9.2  | 5     |
| 13607332 | 6.3  | 1     |
| 13607335 | 60.6 | 25.8  |
| 13607338 | 8.3  | 88.6  |
| 13607339 | 10.3 | 13.9  |
| 13607341 | 71.6 | 8.6   |
| 13607344 | 62.7 | 8.9   |
| 13607345 | 79.4 | 41.7  |
| 13607347 | 11.1 | 1     |
| 13607348 | 8.6  | 22.5  |
| 13607351 | 32.3 | 5.6   |
| 13607352 | 0.8  | 20.4  |
| 13607355 | 2.1  | 21.1  |
| 13607357 | 67.2 | 14.2  |
| 13607362 | 27.5 | 10.2  |
| 13607367 | 32.9 | 1     |
| 13607369 | 39.1 | 33.9  |
| 13607370 | 54.7 | 83.9  |
| 13607376 | 0.5  | 111.2 |
| 13607378 | 3.7  | 1     |
| 13607379 | 38.4 | 4.4   |
| 13607381 | 37.7 | 26.8  |
| 13607382 | 13.8 | 16.6  |
| 13607383 | 39.9 | 4.1   |
| 13607384 | 46.8 | 12.1  |
| 13607419 | 54.2 | 69.3  |
| 13607422 | 67.7 | 4.6   |
| 13607424 | 0.3  | 18.8  |
| 13607425 | 15.9 | 17.2  |
| 13607428 | 0.7  | 57.5  |
| 13607429 | 55.8 | 61    |
| 13607434 | 3.4  | 148.5 |
| 13607444 | 72.8 | 1     |
| 13607450 | 70.6 | 1     |
| 13607454 | 12.6 | 7.2   |
| 13607458 | 1.8  | 16.1  |
| 13607465 | 1.5  | 53.1  |
| 13607469 | 33.1 | 40.4  |
| 13607470 | 0.7  | 27.4  |
| 13607480 | 31.8 | 8.9   |
| 13607482 | 25.7 | 4.4   |
| 13607486 | 36.6 | 17.9  |
| 13607487 | 20.3 | 1.4   |
| 13607490 | 34.3 | 2.7   |
| 13607491 | 28.2 | 4.7   |
| 13607706 | 65.7 | 5.9   |
| 13607707 | 77.4 | 40.9  |
| 13607711 | 22.6 | 40.4  |
| 13607712 | 45.3 | 2.9   |
| 13607717 | 78.5 | 49.5  |
| 13607721 | 27.4 | 89.4  |
| 13607722 | 13.1 | 5.1   |
| 13607723 | 35.0 | 4.6   |
| 13607812 | 0.7  | 56.2  |
| 13607815 | 67.8 | 16    |
| 13607823 | 4.7  | 40.2  |
| 13607824 | 54.4 | 16.7  |

|          |      |       |
|----------|------|-------|
| 13607826 | 0.3  | 8.6   |
| 13607829 | 78.1 | 13    |
| 13607833 | 41.0 | 5.7   |
| 13607835 | 66.9 | 12.6  |
| 13607836 | 75.5 | 19.4  |
| 13607837 | 5.6  | 231   |
| 13607838 | 5.1  | 236.1 |
| 13607840 | 0.5  | 161.6 |
| 13607845 | 68.4 | 3.6   |
| 13607846 | 67.8 | 19.6  |
| 13607847 | 62.3 | 1.7   |
| 13607851 | 14.2 | 107.5 |
| 13607856 | 16.9 | 95.3  |
| 13607858 | 4.6  | 8.6   |
| 13607859 | 16.9 | 25.7  |
| 13607860 | 13.7 | 11.4  |
| 13607864 | 16.8 | 20.8  |
| 13607867 | 16.5 | 2     |
| 13607868 | 61.4 | 15.8  |
| 13607869 | 13.0 | 21.6  |
| 13607870 | 72.0 | 4.7   |
| 13607872 | 14.9 | 13.7  |
| 13607875 | 73.8 | 21.7  |
| 13607876 | 64.7 | 28.9  |
| 13607878 | 16.0 | 1     |
| 13607881 | 12.6 | 9.1   |
| 13607882 | 60.9 | 9.2   |
| 13607883 | 39.3 | 29.2  |
| 13607884 | 0.5  | 110.7 |
| 13607886 | 48.9 | 9.7   |
| 13607890 | 32.0 | 95.7  |
| 13607893 | 30.3 | 44.7  |
| 13607894 | 70.7 | 4.5   |
| 13607895 | 21.4 | 4.6   |
| 13607896 | 23.4 | 7.1   |
| 13607898 | 0.8  | 20.1  |
| 13607900 | 47.0 | 141.2 |
| 13607902 | 7.0  | 1.4   |
| 13607903 | 45.6 | 8.1   |
| 13607904 | 49.2 | 14.3  |
| 13607905 | 58.1 | 52.3  |
| 13607907 | 29.5 | 17.5  |
| 13607908 | 3.6  | 34.6  |
| 13607910 | 55.0 | 6.5   |
| 13607911 | 71.0 | 21.3  |
| 13607912 | 35.4 | 2.7   |
| 13607913 | 35.4 | 6.5   |
| 13607914 | 3.7  | 1     |
| 13607919 | 66.1 | 5.2   |
| 13607921 | 19.3 | 5.5   |
| 13607923 | 33.4 | 25.1  |
| 13607924 | 0.2  | 17.4  |
| 13607925 | 73.8 | 9.5   |
| 13607933 | 2.8  | 1.8   |
| 13607941 | 45.4 | 2.6   |
| 13607942 | 0.1  | 22.7  |
| 13607944 | 0.3  | 18.9  |

|          |      |       |
|----------|------|-------|
| 13607947 | 69.2 | 25.2  |
| 13607948 | 16.1 | 2.9   |
| 13607950 | 79.8 | 21.3  |
| 13607951 | 19.9 | 15    |
| 13607952 | 0.5  | 149   |
| 13607955 | 73.8 | 114.4 |
| 13607956 | 68.1 | 23    |
| 13607957 | 0.7  | 84.6  |
| 13607958 | 11.0 | 9     |
| 13607959 | 0.1  | 6.2   |
| 13607964 | 0.7  | 35.6  |
| 13607965 | 40.4 | 6.2   |
| 13607969 | 0.7  | 3.9   |
| 13607971 | 77.2 | 149   |
| 13607973 | 2.7  | 1     |
| 13607976 | 5.8  | 2.7   |
| 13607980 | 8.0  | 4.6   |
| 13607982 | 11.6 | 1     |
| 13607990 | 37.0 | 20.6  |
| 13607992 | 26.7 | 1     |
| 13607994 | 40.1 | 97.6  |
| 13607995 | 18.6 | 28.8  |
| 13607997 | 24.1 | 15.7  |
| 13607998 | 41.7 | 23.9  |
| 13608001 | 47.2 | 4.8   |
| 13608003 | 0.3  | 2     |
| 13608006 | 49.1 | 19.5  |
| 13608010 | 45.8 | 16.4  |
| 13608018 | 35.0 | 16.6  |
| 13608020 | 57.8 | 44    |
| 13608021 | 23.4 | 6.3   |
| 13608023 | 25.3 | 1     |
| 13608025 | 22.3 | 11.1  |
| 13608071 | 5.8  | 49.8  |
| 13608072 | 34.8 | 1     |
| 13608073 | 39.6 | 9.5   |
| 13608074 | 0.7  | 2.8   |
| 13608077 | 23.1 | 25.4  |
| 13608085 | 20.3 | 7.8   |
| 13608087 | 66.3 | 8.4   |
| 13608092 | 30.8 | 25.3  |
| 13608094 | 9.0  | 10.9  |
| 13608099 | 0.1  | 90.7  |
| 13608102 | 55.9 | 24.5  |
| 13608103 | 33.9 | 16.2  |
| 13608104 | 55.9 | 15.6  |
| 13608106 | 54.2 | 8     |
| 13600001 | 0.3  | 1.4   |
| 13600003 | 1.9  | 2.2   |
| 13600004 | 10.5 | 2.4   |
| 13600005 | 48.0 | 48.3  |
| 13600006 | 35.0 | 4.1   |
| 13600009 | 34.7 | 58.1  |
| 13600010 | 2.9  | 1     |
| 13600012 | 3.9  | 2.7   |
| 13600018 | 10.9 | 1.1   |
| 13600023 | 8.5  | 1.9   |

|          |      |       |
|----------|------|-------|
| 13600025 | 0.9  | 1     |
| 13600026 | 11.8 | 1     |
| 13600027 | 11.6 | 2.7   |
| 13600028 | 21.1 | 17.1  |
| 13600029 | 10.5 | 10.1  |
| 13600030 | 18.8 | 112.5 |
| 13600032 | 9.7  | 20.2  |
| 13600036 | 14.2 | 203.2 |
| 13600037 | 13.1 | 1     |
| 13600038 | 9.6  | 5.8   |
| 13600040 | 12.2 | 9.2   |
| 13600042 | 13.3 | 1     |
| 13600043 | 18.0 | 1.7   |
| 13600044 | 18.0 | 114.4 |
| 13600045 | 4.2  | 60    |
| 13600046 | 37.7 | 14.4  |
| 13600047 | 38.5 | 1     |
| 13600048 | 21.3 | 7     |
| 13600051 | 51.7 | 38.3  |
| 13600052 | 25.1 | 1     |
| 13600053 | 26.4 | 1.6   |
| 13600054 | 59.8 | 12    |
| 13600059 | 24.0 | 12.1  |
| 13600060 | 41.2 | 2.5   |
| 13600061 | 52.5 | 39.8  |
| 13600063 | 24.6 | 29.6  |
| 13600064 | 41.7 | 13.4  |
| 13600065 | 57.4 | 2.2   |
| 13600067 | 37.7 | 9.5   |
| 13600070 | 71.9 | 1.1   |
| 13600072 | 56.3 | 12.4  |
| 13600077 | 68.3 | 35.9  |
| 13600078 | 71.4 | 13.2  |
| 13600080 | 76.4 | 11.9  |
| 13600081 | 0.6  | 9.6   |
| 13600082 | 71.5 | 1     |
| 13600083 | 66.6 | 31.7  |
| 13600087 | 69.0 | 14.6  |
| 13600089 | 72.2 | 18    |
| 13600090 | 69.5 | 4.2   |
| 13600091 | 15.6 | 36.8  |
| 13600092 | 69.6 | 55.2  |
| 13600093 | 15.1 | 20.1  |
| 13600095 | 65.2 | 2.5   |
| 13600098 | 17.1 | 27    |
| 13600100 | 2.0  | 1     |
| 13600102 | 4.0  | 1     |
| 13600111 | 63.3 | 1.5   |
| 13600112 | 64.7 | 9.6   |
| 13600114 | 48.3 | 19.7  |
| 13600116 | 27.7 | 1.5   |
| 13600118 | 28.4 | 15.5  |
| 13600121 | 34.2 | 24.9  |
| 13600125 | 45.1 | 50.4  |
| 13600131 | 7.9  | 5     |
| 13600132 | 72.1 | 2.7   |
| 13600133 | 20.1 | 2.4   |



|          |      |      |
|----------|------|------|
| 13600142 | 4.0  | 13   |
| 13600143 | 67.7 | 7    |
| 13600145 | 65.8 | 1.2  |
| 13600149 | 4.3  | 45.9 |
| 13600150 | 59.2 | 3.3  |
| 13600152 | 45.9 | 63.5 |
| 13600153 | 42.2 | 2.5  |
| 13600155 | 52.7 | 16.7 |
| 13600156 | 59.1 | 18.9 |
| 13600158 | 1.9  | 1.7  |
| 13600160 | 57.4 | 7.5  |
| 13600162 | 36.6 | 17   |
| 13600163 | 39.8 | 1.3  |
| 13600164 | 78.2 | 47.1 |
| 13600167 | 59.0 | 44.4 |
| 13600170 | 12.2 | 8    |
| 13600172 | 11.7 | 1    |
| 13600175 | 57.4 | 38.7 |
| 13600177 | 0.7  | 17.6 |
| 13600180 | 16.5 | 9.8  |
| 13600181 | 21.0 | 1.7  |
| 13600182 | 61.4 | 49.6 |
| 13600183 | 13.8 | 1    |
| 13600184 | 9.1  | 1.5  |
| 13600186 | 14.5 | 2.9  |
| 13600189 | 8.0  | 5.5  |
| 13600190 | 39.5 | 10.7 |
| 13600191 | 8.0  | 26.9 |
| 13600194 | 64.3 | 21.2 |
| 13600196 | 49.7 | 1    |
| 13600197 | 21.3 | 44.2 |
| 13600204 | 43.5 | 28.6 |
| 13600205 | 49.3 | 14.1 |
| 13600210 | 65.1 | 4.6  |
| 13600212 | 26.1 | 20.7 |
| 13600214 | 36.9 | 19.8 |
| 13600215 | 15.2 | 34.1 |
| 13600217 | 59.3 | 57.6 |
| 13600219 | 48.3 | 4.4  |
| 13600220 | 51.4 | 9.7  |
| 13600221 | 51.0 | 1.9  |
| 13600222 | 39.2 | 44.1 |
| 13600227 | 0.4  | 82   |
| 13600228 | 13.4 | 6.1  |
| 13600231 | 12.1 | 2.8  |
| 13600233 | 11.7 | 4.4  |
| 13600235 | 10.3 | 8.4  |
| 13600236 | 6.5  | 1.9  |
| 13600238 | 11.2 | 8.2  |
| 13600241 | 9.4  | 2.1  |
| 13600243 | 33.9 | 39.2 |
| 13600245 | 1.0  | 48.9 |
| 13600250 | 11.9 | 2.7  |
| 13600251 | 4.6  | 31.6 |
| 13600252 | 54.9 | 1.6  |
| 13600254 | 47.0 | 17.8 |
| 13600256 | 47.5 | 22   |

|          |      |       |
|----------|------|-------|
| 13600257 | 12.5 | 2.3   |
| 13600259 | 0.4  | 115.6 |
| 13600260 | 79.6 | 39    |
| 13600261 | 1.6  | 47.8  |
| 13600270 | 3.6  | 1     |
| 13600273 | 1.6  | 21    |
| 13600277 | 71.0 | 4.4   |
| 13600279 | 4.4  | 11.9  |
| 13600280 | 2.5  | 2.6   |
| 13600281 | 67.6 | 20.5  |
| 13600285 | 66.7 | 3.6   |
| 13600286 | 4.5  | 10.1  |
| 13600290 | 64.2 | 26.2  |
| 13600291 | 17.7 | 1.1   |
| 13600292 | 63.5 | 1     |
| 13600293 | 65.0 | 11.4  |
| 13600295 | 18.0 | 27.4  |
| 13600297 | 30.8 | 14.2  |
| 13600298 | 15.4 | 31    |
| 13600299 | 39.1 | 1.2   |
| 13600300 | 59.6 | 19.5  |
| 13600301 | 52.0 | 2.6   |
| 13600302 | 1.3  | 17.7  |
| 13600303 | 37.4 | 11.6  |
| 13600304 | 5.2  | 1.2   |
| 13600305 | 58.9 | 96.2  |
| 13600307 | 4.2  | 215.9 |
| 13600308 | 20.9 | 100   |
| 13600309 | 40.7 | 1     |
| 13600310 | 59.6 | 28.6  |
| 13600311 | 19.5 | 131.4 |
| 13600312 | 5.0  | 4.6   |
| 13600313 | 51.9 | 11.5  |
| 13600314 | 14.1 | 12.5  |
| 13600317 | 1.4  | 22.1  |
| 13600318 | 48.3 | 111.6 |
| 13600319 | 8.0  | 10    |
| 13600320 | 6.0  | 13.4  |
| 13600321 | 0.9  | 9.2   |
| 13600322 | 36.2 | 2.7   |
| 13600325 | 9.7  | 17.2  |
| 13600326 | 10.6 | 1     |
| 13600329 | 47.7 | 1     |
| 13600330 | 10.5 | 1.3   |
| 13600332 | 33.5 | 2.2   |
| 13600334 | 37.9 | 20.1  |
| 13600338 | 4.5  | 4     |
| 13600343 | 27.8 | 19.2  |
| 13600345 | 48.1 | 1.5   |
| 13600350 | 79.7 | 2.2   |
| 13600351 | 10.1 | 1     |
| 13600352 | 10.4 | 1     |
| 13600353 | 1.0  | 483.8 |
| 13600354 | 12.4 | 4.3   |
| 13600356 | 39.6 | 5     |
| 13600358 | 12.7 | 11.2  |
| 13600365 | 14.2 | 35    |

|          |      |       |
|----------|------|-------|
| 13600367 | 56.5 | 1     |
| 13600370 | 52.3 | 1.5   |
| 13600371 | 42.2 | 66.6  |
| 13600376 | 37.0 | 4.3   |
| 13600446 | 53.1 | 7.9   |
| 13600448 | 29.7 | 47.3  |
| 13600449 | 25.2 | 18.4  |
| 13600452 | 62.5 | 24.2  |
| 13600453 | 4.9  | 1     |
| 13600455 | 65.5 | 1.6   |
| 13600457 | 67.1 | 31.4  |
| 13600459 | 71.8 | 36.2  |
| 13600460 | 0.7  | 12.3  |
| 13600461 | 74.0 | 4.6   |
| 13600463 | 78.8 | 12.8  |
| 13600464 | 51.4 | 17.3  |
| 13600465 | 78.5 | 140.1 |
| 13600470 | 14.9 | 2.5   |
| 13600471 | 33.2 | 13.1  |
| 13600474 | 58.2 | 16.9  |
| 13600475 | 56.2 | 2.2   |
| 13600479 | 46.6 | 7.3   |
| 13600480 | 19.5 | 22.7  |
| 13600482 | 34.1 | 10.3  |
| 13600484 | 62.7 | 6.1   |
| 13600485 | 70.2 | 18.2  |
| 13600487 | 38.8 | 8.1   |
| 13600491 | 3.9  | 1     |
| 13600492 | 40.6 | 11.3  |
| 13600494 | 32.2 | 851   |
| 13600499 | 20.6 | 42.2  |
| 13600501 | 44.1 | 12.4  |
| 13600502 | 80.0 | 5.3   |
| 13600511 | 66.4 | 14.7  |
| 13600512 | 64.4 | 3.5   |
| 13600513 | 65.3 | 12.1  |
| 13600514 | 65.5 | 40.1  |
| 13600516 | 62.6 | 2.6   |
| 13600519 | 16.9 | 1     |
| 13600520 | 53.7 | 7.7   |
| 13600522 | 73.3 | 13    |
| 13600523 | 74.8 | 44.5  |
| 13600524 | 73.6 | 2.5   |
| 13600525 | 72.4 | 1     |
| 13600526 | 70.0 | 13.1  |
| 13600529 | 65.1 | 13    |
| 13600531 | 0.4  | 137.6 |
| 13600532 | 15.8 | 32    |
| 13600534 | 65.0 | 20.1  |
| 13600536 | 63.5 | 7.6   |
| 13600538 | 60.7 | 7.5   |
| 13600539 | 60.6 | 47.4  |
| 13600540 | 34.6 | 52.8  |
| 13600541 | 47.8 | 1     |
| 13600544 | 55.2 | 3.4   |
| 13600545 | 38.9 | 286   |
| 13600547 | 54.2 | 6.7   |

|          |      |       |
|----------|------|-------|
| 13600548 | 51.3 | 3.2   |
| 13600553 | 14.0 | 13.4  |
| 13600554 | 43.1 | 4.5   |
| 13600555 | 18.9 | 61.5  |
| 13600601 | 4.3  | 1.9   |
| 13600602 | 70.7 | 6.6   |
| 13600603 | 49.5 | 29.4  |
| 13600605 | 29.7 | 9.6   |
| 13600609 | 19.5 | 8.4   |
| 13600610 | 41.1 | 9.5   |
| 13600611 | 43.1 | 133   |
| 13600615 | 73.4 | 27.1  |
| 13600617 | 61.5 | 23    |
| 13600621 | 54.8 | 4.8   |
| 13600622 | 43.6 | 5.4   |
| 13600626 | 64.4 | 43.9  |
| 13600628 | 34.7 | 3.3   |
| 13600635 | 14.5 | 1     |
| 13600636 | 41.4 | 2.7   |
| 13600675 | 66.4 | 3.8   |
| 13600676 | 66.8 | 12.1  |
| 13600680 | 71.1 | 1     |
| 13600681 | 71.6 | 27.4  |
| 13600682 | 72.7 | 3.7   |
| 13600684 | 0.8  | 55.5  |
| 13600685 | 73.2 | 24.8  |
| 13600687 | 37.2 | 5.6   |
| 13600688 | 77.3 | 14.5  |
| 13600689 | 21.0 | 36.7  |
| 13600691 | 73.1 | 11.1  |
| 13600695 | 2.1  | 5.3   |
| 13600696 | 3.8  | 1     |
| 13600702 | 62.8 | 6.7   |
| 13600703 | 61.9 | 11    |
| 13600704 | 61.3 | 230.5 |
| 13600705 | 42.2 | 4.3   |
| 13600707 | 43.4 | 25.7  |
| 13600708 | 48.9 | 13.9  |
| 13600710 | 28.6 | 3.6   |
| 13600711 | 58.7 | 25.4  |
| 13600720 | 66.1 | 14.1  |
| 13600722 | 36.8 | 8.8   |
| 13600726 | 58.3 | 15.2  |
| 13600730 | 59.1 | 106.2 |
| 13600731 | 2.7  | 1     |
| 13600742 | 0.9  | 3.7   |
| 13600743 | 22.9 | 7.9   |
| 13600744 | 11.4 | 19.4  |
| 13600745 | 3.5  | 4.7   |
| 13600748 | 0.4  | 95.3  |
| 13600749 | 75.1 | 48.4  |
| 13600752 | 11.4 | 1     |
| 13600753 | 7.7  | 79.1  |
| 13600755 | 31.4 | 16.9  |
| 13600757 | 16.3 | 6.6   |
| 13600758 | 42.0 | 30.3  |
| 13600759 | 7.9  | 3.6   |

|          |      |       |
|----------|------|-------|
| 13600761 | 0.7  | 44.1  |
| 13600763 | 11.4 | 27.1  |
| 13600767 | 7.9  | 1.3   |
| 13600770 | 12.7 | 1     |
| 13600772 | 52.5 | 10.2  |
| 13600773 | 46.9 | 8.4   |
| 13600774 | 53.9 | 53.6  |
| 13600776 | 40.4 | 1.5   |
| 13600777 | 6.6  | 12.2  |
| 13600778 | 42.9 | 1.5   |
| 13600781 | 58.4 | 1     |
| 13600783 | 50.4 | 10.4  |
| 13600784 | 20.5 | 2.1   |
| 13600785 | 56.5 | 3.9   |
| 13600786 | 27.3 | 4.3   |
| 13600793 | 76.7 | 12.5  |
| 13600794 | 66.5 | 30.4  |
| 13600796 | 36.5 | 4.1   |
| 13600799 | 38.3 | 42.5  |
| 13600803 | 0.2  | 5     |
| 13600807 | 70.4 | 6.8   |
| 13600808 | 71.0 | 14.8  |
| 13600809 | 1.2  | 11.3  |
| 13600810 | 78.4 | 2.8   |
| 13600813 | 0.8  | 20.2  |
| 13600814 | 73.8 | 43.3  |
| 13600819 | 67.3 | 1.7   |
| 13600821 | 65.5 | 13    |
| 13600822 | 65.7 | 7     |
| 13600827 | 61.7 | 3.8   |
| 13600830 | 61.4 | 26.6  |
| 13600832 | 60.1 | 19.6  |
| 13600833 | 23.8 | 4     |
| 13600835 | 58.7 | 5.9   |
| 13600837 | 27.5 | 2.1   |
| 13600839 | 70.5 | 21.9  |
| 13600840 | 42.5 | 36.3  |
| 13600841 | 50.9 | 34.4  |
| 13600843 | 53.4 | 1.4   |
| 13600848 | 51.7 | 2.2   |
| 13600849 | 25.0 | 21.3  |
| 13600850 | 43.8 | 49.7  |
| 13600853 | 10.9 | 1     |
| 13600854 | 36.7 | 20.7  |
| 13600857 | 2.1  | 20.9  |
| 13600858 | 57.1 | 1.1   |
| 13600859 | 32.6 | 1.1   |
| 13600860 | 11.4 | 26.1  |
| 13600862 | 55.4 | 28.6  |
| 13600863 | 11.5 | 360.1 |
| 13600868 | 0.2  | 1     |
| 13600870 | 10.5 | 44.6  |
| 13600871 | 44.0 | 106.5 |
| 13600872 | 57.1 | 33.2  |
| 13600873 | 66.6 | 47.5  |
| 13600875 | 60.7 | 36.7  |
| 13600879 | 5.2  | 13    |

|          |      |       |
|----------|------|-------|
| 13600880 | 10.2 | 1     |
| 13600883 | 3.3  | 1.4   |
| 13600884 | 6.7  | 47.8  |
| 13600887 | 59.4 | 68.9  |
| 13600889 | 5.7  | 12.6  |
| 13600890 | 62.8 | 4.5   |
| 13600891 | 5.9  | 42.7  |
| 13600892 | 11.4 | 23.9  |
| 13600896 | 12.5 | 29.1  |
| 13600902 | 16.3 | 1     |
| 13600904 | 52.8 | 35.2  |
| 13600906 | 7.0  | 2.7   |
| 13600909 | 1.0  | 107.7 |
| 13600910 | 58.8 | 3.8   |
| 13600913 | 20.4 | 52    |
| 13600915 | 30.3 | 4.7   |
| 13600916 | 4.0  | 17.2  |
| 13600917 | 53.7 | 56.2  |
| 13600918 | 22.9 | 23.5  |
| 13600920 | 20.7 | 5.4   |
| 13600921 | 35.8 | 4.4   |
| 13600922 | 57.2 | 1.4   |
| 13600925 | 50.8 | 5.7   |
| 13600926 | 55.6 | 6.8   |
| 13600928 | 3.3  | 1     |
| 13600929 | 47.0 | 8.4   |
| 13600930 | 41.4 | 117.5 |
| 13600933 | 4.7  | 29.3  |
| 13600935 | 73.5 | 8.6   |
| 13600936 | 74.8 | 64    |
| 13600938 | 51.7 | 28.2  |
| 13600945 | 3.9  | 1     |
| 13600946 | 76.6 | 31.5  |
| 13600947 | 78.2 | 11.9  |
| 13600952 | 74.5 | 45.9  |
| 13600956 | 72.6 | 3.4   |
| 13600957 | 12.2 | 8     |
| 13600963 | 74.0 | 47.2  |
| 13600964 | 3.4  | 1     |
| 13600965 | 14.8 | 11.4  |
| 13600968 | 71.9 | 10.7  |
| 13600969 | 42.8 | 3     |
| 13600971 | 66.3 | 3.1   |
| 13600972 | 65.3 | 18.6  |
| 13600973 | 64.7 | 32.5  |
| 13600974 | 43.0 | 36.2  |
| 13600975 | 60.7 | 30.8  |
| 13600976 | 34.3 | 1.1   |
| 13600977 | 5.5  | 6.3   |
| 13600979 | 19.1 | 9.7   |
| 13600985 | 67.2 | 1     |
| 13600986 | 65.5 | 13.7  |
| 13600987 | 16.4 | 14.5  |
| 13600994 | 61.2 | 12.7  |
| 13600995 | 61.7 | 1.3   |
| 13600998 | 60.9 | 18.1  |
| 13601002 | 16.9 | 9     |

|          |      |       |
|----------|------|-------|
| 13601003 | 58.8 | 4.8   |
| 13601004 | 2.9  | 1.7   |
| 13601007 | 32.8 | 3.9   |
| 13601008 | 25.5 | 8.5   |
| 13601010 | 39.5 | 1.2   |
| 13601011 | 49.1 | 8.4   |
| 13601012 | 66.8 | 5.2   |
| 13601013 | 57.2 | 41.1  |
| 13601015 | 23.4 | 11.7  |
| 13601016 | 11.4 | 133.6 |
| 13601017 | 10.5 | 4.4   |
| 13601019 | 49.8 | 3.8   |
| 13601021 | 35.9 | 39    |
| 13601022 | 55.0 | 1.5   |
| 13601024 | 25.5 | 2.4   |
| 13601025 | 31.1 | 2.9   |
| 13601026 | 55.2 | 1.6   |
| 13601029 | 24.1 | 13.6  |
| 13601030 | 49.4 | 19.8  |
| 13601032 | 54.9 | 8.3   |
| 13601035 | 44.2 | 4.9   |
| 13601036 | 26.8 | 1.1   |
| 13601040 | 28.9 | 162.5 |
| 13601043 | 24.2 | 6.8   |
| 13601046 | 23.6 | 5.9   |
| 13601047 | 44.9 | 4.9   |
| 13601049 | 76.3 | 17.1  |
| 13601050 | 33.5 | 24.5  |
| 13601051 | 23.5 | 47.3  |
| 13601052 | 53.4 | 13.1  |
| 13601055 | 59.0 | 40.1  |
| 13601058 | 4.2  | 112.3 |
| 13601059 | 21.5 | 8.6   |
| 13601061 | 16.1 | 13.1  |
| 13601062 | 18.1 | 21.7  |
| 13601063 | 31.8 | 4.8   |
| 13601085 | 41.1 | 6.1   |
| 13601086 | 0.4  | 85.3  |
| 13601088 | 55.3 | 46.1  |
| 13601091 | 12.1 | 42.6  |
| 13601092 | 8.7  | 1     |
| 13601094 | 1.0  | 61.1  |
| 13601097 | 68.2 | 16.9  |
| 13601098 | 50.8 | 15    |
| 13601213 | 1.0  | 182.1 |
| 13601214 | 25.4 | 258   |
| 13601230 | 47.0 | 55.1  |
| 13601231 | 64.5 | 4.5   |
| 13601233 | 44.8 | 18.6  |
| 13601238 | 21.8 | 111.9 |
| 13601239 | 37.1 | 1.6   |
| 13601241 | 63.2 | 3.2   |
| 13601244 | 3.3  | 1.4   |
| 13601245 | 74.8 | 17.5  |
| 13601247 | 72.6 | 108.6 |
| 13601249 | 66.6 | 5.6   |
| 13601250 | 64.7 | 42.9  |

|          |      |       |
|----------|------|-------|
| 13601251 | 23.6 | 35.7  |
| 13601255 | 52.6 | 8.1   |
| 13601257 | 69.6 | 24.9  |
| 13601261 | 39.9 | 13.6  |
| 13601262 | 72.3 | 11    |
| 13601264 | 67.1 | 22.8  |
| 13601266 | 71.8 | 22.8  |
| 13601268 | 66.2 | 86.9  |
| 13601270 | 22.4 | 28.8  |
| 13601271 | 20.1 | 1.5   |
| 13601272 | 40.9 | 1     |
| 13601273 | 59.4 | 8.7   |
| 13601274 | 25.5 | 1.9   |
| 13601275 | 35.3 | 3     |
| 13601280 | 11.9 | 21.7  |
| 13601282 | 42.1 | 3.8   |
| 13601283 | 30.0 | 88.5  |
| 13601297 | 67.6 | 34.4  |
| 13601302 | 4.7  | 89.6  |
| 13601304 | 9.2  | 1     |
| 13601306 | 9.8  | 13    |
| 13601307 | 12.6 | 1     |
| 13601308 | 6.3  | 37    |
| 13601311 | 11.2 | 2.4   |
| 13601312 | 9.6  | 1     |
| 13601315 | 63.3 | 135.3 |
| 13601317 | 57.0 | 8.9   |
| 13601318 | 17.1 | 1     |
| 13601323 | 31.6 | 58    |
| 13601324 | 43.9 | 23.9  |
| 13601326 | 27.9 | 11.3  |
| 13601327 | 6.6  | 2.1   |
| 13601329 | 78.1 | 52.3  |
| 13601331 | 77.3 | 5.6   |
| 13601332 | 46.9 | 9.6   |
| 13601334 | 48.6 | 15.6  |
| 13601335 | 43.5 | 8.9   |
| 13601336 | 37.8 | 7     |
| 13601337 | 0.2  | 17.1  |
| 13601338 | 19.7 | 6.3   |
| 13601339 | 73.1 | 3.1   |
| 13601340 | 0.5  | 83.3  |
| 13601341 | 73.7 | 5.7   |
| 13601342 | 72.8 | 3.8   |
| 13601343 | 72.3 | 19.2  |
| 13601344 | 72.8 | 4.7   |
| 13601345 | 0.6  | 59.9  |
| 13601346 | 72.2 | 62.4  |
| 13601348 | 77.8 | 78.1  |
| 13601351 | 9.0  | 2.1   |
| 13601354 | 60.3 | 7     |
| 13601355 | 73.0 | 28.3  |
| 13601356 | 60.8 | 9.6   |
| 13601357 | 67.4 | 95.7  |
| 13601359 | 18.2 | 9     |
| 13601360 | 69.2 | 5.3   |
| 13601364 | 65.0 | 20.9  |



|          |      |       |
|----------|------|-------|
| 13601369 | 58.5 | 21.6  |
| 13601370 | 48.4 | 4.8   |
| 13601374 | 61.6 | 2     |
| 13601375 | 63.4 | 22.5  |
| 13601377 | 60.5 | 9.7   |
| 13601382 | 22.4 | 3.3   |
| 13601388 | 40.5 | 22.7  |
| 13601389 | 51.3 | 3.9   |
| 13601391 | 47.9 | 3.4   |
| 13601393 | 58.1 | 26.7  |
| 13601395 | 35.4 | 1     |
| 13601396 | 41.6 | 2.9   |
| 13601401 | 0.8  | 15.5  |
| 13601402 | 30.4 | 18.4  |
| 13601404 | 52.3 | 16.4  |
| 13601405 | 8.4  | 29.8  |
| 13601406 | 5.3  | 1     |
| 13601407 | 34.2 | 21.5  |
| 13601412 | 20.2 | 60.4  |
| 13601414 | 45.5 | 6.2   |
| 13601415 | 10.7 | 36.1  |
| 13601416 | 10.2 | 21.2  |
| 13601417 | 3.1  | 1     |
| 13601418 | 20.5 | 262.9 |
| 13601419 | 58.5 | 13.7  |
| 13601423 | 47.9 | 1.7   |
| 13601425 | 53.1 | 156.5 |
| 13601426 | 11.1 | 29.3  |
| 13601428 | 11.7 | 199.2 |
| 13601432 | 13.3 | 338.3 |
| 13601433 | 8.9  | 1     |
| 13601439 | 10.0 | 76.7  |
| 13601441 | 18.4 | 7.3   |
| 13601445 | 38.8 | 10.9  |
| 13601448 | 28.0 | 16.3  |
| 13601449 | 1.9  | 1     |
| 13601450 | 40.0 | 2.3   |
| 13601451 | 55.7 | 18.6  |
| 13601452 | 23.6 | 1     |
| 13601453 | 55.3 | 7.4   |
| 13601454 | 56.5 | 1     |
| 13601455 | 45.0 | 257.8 |
| 13601456 | 20.6 | 2.9   |
| 13601459 | 36.3 | 16.3  |
| 13601460 | 59.5 | 1     |
| 13601462 | 27.4 | 17.6  |
| 13601463 | 51.3 | 8.7   |
| 13601468 | 27.8 | 1.6   |
| 13601469 | 79.2 | 61.6  |
| 13601470 | 59.6 | 3     |
| 13601471 | 42.6 | 29.7  |
| 13601473 | 76.5 | 3.5   |
| 13601474 | 77.0 | 98.4  |
| 13601478 | 71.3 | 23.7  |
| 13601479 | 69.2 | 3     |
| 13601480 | 65.1 | 1     |
| 13601481 | 0.6  | 30.7  |

|          |      |       |
|----------|------|-------|
| 13601483 | 3.3  | 6.7   |
| 13601487 | 71.2 | 51.7  |
| 13601490 | 4.8  | 1.8   |
| 13601491 | 0.7  | 13.4  |
| 13601492 | 67.9 | 15    |
| 13601496 | 64.0 | 8.7   |
| 13601497 | 61.1 | 4.7   |
| 13601499 | 23.1 | 3.2   |
| 13601500 | 33.0 | 2.5   |
| 13601501 | 60.6 | 7     |
| 13601503 | 50.6 | 132.3 |
| 13601504 | 28.7 | 85.6  |
| 13601505 | 42.3 | 6.7   |
| 13601506 | 28.5 | 2.8   |
| 13601507 | 53.0 | 4.9   |
| 13601509 | 23.9 | 1     |
| 13601510 | 29.7 | 2.2   |
| 13601514 | 20.2 | 20.6  |
| 13601515 | 26.6 | 35.5  |
| 13601516 | 21.7 | 20.4  |
| 13601517 | 44.2 | 6.8   |
| 13601519 | 58.5 | 10.6  |
| 13601525 | 39.0 | 8.8   |
| 13601526 | 63.6 | 24.1  |
| 13601528 | 67.9 | 5.2   |
| 13601530 | 56.2 | 4.7   |
| 13601532 | 35.7 | 25.2  |
| 13601534 | 58.1 | 68.9  |
| 13601535 | 3.2  | 1.8   |
| 13601539 | 59.0 | 25.3  |
| 13601540 | 37.3 | 21.1  |
| 13601542 | 60.9 | 26.9  |
| 13601543 | 23.7 | 25.6  |
| 13601547 | 63.2 | 9.1   |
| 13601548 | 63.9 | 44.1  |
| 13601551 | 0.9  | 17.2  |
| 13601553 | 11.0 | 9.9   |
| 13601562 | 51.2 | 14.6  |
| 13601564 | 28.8 | 5.5   |
| 13601565 | 22.2 | 23.8  |
| 13601566 | 52.3 | 46.4  |
| 13601569 | 4.4  | 19.1  |
| 13601570 | 63.2 | 8.6   |
| 13601571 | 1.8  | 2.3   |
| 13601573 | 11.1 | 8.8   |
| 13601574 | 31.0 | 12.8  |
| 13601576 | 27.2 | 14.1  |
| 13601579 | 57.8 | 71.2  |
| 13601580 | 0.6  | 53.5  |
| 13601581 | 57.5 | 7.7   |
| 13601582 | 60.1 | 3.1   |
| 13601589 | 76.7 | 3.4   |
| 13601590 | 77.0 | 15.3  |
| 13601591 | 76.5 | 83.4  |
| 13601593 | 2.9  | 1     |
| 13601594 | 0.9  | 9.9   |
| 13601595 | 0.5  | 107.6 |

|          |      |       |
|----------|------|-------|
| 13601596 | 0.5  | 27.5  |
| 13601597 | 11.5 | 98.4  |
| 13601598 | 2.4  | 1     |
| 13601599 | 11.7 | 10.1  |
| 13601604 | 78.6 | 47.1  |
| 13601605 | 76.8 | 11.5  |
| 13601607 | 60.1 | 209.9 |
| 13601609 | 5.5  | 30.1  |
| 13601610 | 2.9  | 1     |
| 13601613 | 36.0 | 4.8   |
| 13601616 | 9.9  | 167.4 |
| 13601618 | 4.1  | 30.8  |
| 13601619 | 38.7 | 53.4  |
| 13601620 | 14.8 | 24.7  |
| 13601621 | 29.2 | 38.5  |
| 13601622 | 74.0 | 7.4   |
| 13601623 | 67.2 | 21.2  |
| 13601625 | 54.1 | 3.1   |
| 13601627 | 62.1 | 1.6   |
| 13601628 | 47.7 | 5.8   |
| 13601631 | 11.8 | 27    |
| 13601635 | 12.3 | 1     |
| 13601638 | 45.8 | 23.3  |
| 13601640 | 19.3 | 1     |
| 13601642 | 71.4 | 1     |
| 13601643 | 70.2 | 1     |
| 13601644 | 72.9 | 7     |
| 13601645 | 70.2 | 23.9  |
| 13601648 | 0.5  | 5.8   |
| 13601649 | 69.3 | 6.2   |
| 13601652 | 42.3 | 4.3   |
| 13601656 | 8.1  | 3.8   |
| 13601660 | 22.6 | 22.8  |
| 13601661 | 65.5 | 1.8   |
| 13601663 | 25.2 | 35.6  |
| 13601665 | 42.5 | 17.2  |
| 13601666 | 40.3 | 5     |
| 13601667 | 60.8 | 314.9 |
| 13601668 | 47.0 | 6.7   |
| 13601669 | 38.1 | 6.1   |
| 13601672 | 58.7 | 3.4   |
| 13601675 | 16.2 | 4.7   |
| 13601678 | 66.9 | 20.2  |
| 13601681 | 22.3 | 3.6   |
| 13601682 | 49.2 | 61.8  |
| 13601684 | 45.9 | 19.2  |
| 13601685 | 0.5  | 54.1  |
| 13601686 | 27.2 | 1.4   |
| 13601687 | 34.0 | 21.8  |
| 13601688 | 47.3 | 252.5 |
| 13601689 | 48.9 | 23.4  |
| 13601691 | 13.4 | 2.4   |
| 13601692 | 26.3 | 4.4   |
| 13601693 | 21.2 | 9.3   |
| 13601696 | 46.5 | 61.2  |
| 13601697 | 33.4 | 7.2   |
| 13601698 | 35.7 | 4.7   |

|          |      |       |
|----------|------|-------|
| 13601699 | 15.0 | 5.8   |
| 13601700 | 50.5 | 8.5   |
| 13601701 | 44.8 | 2     |
| 13601702 | 33.0 | 8     |
| 13601703 | 20.0 | 6.1   |
| 13601704 | 4.1  | 64.8  |
| 13601706 | 55.3 | 51.6  |
| 13601707 | 0.7  | 43.3  |
| 13601709 | 0.4  | 87.2  |
| 13601710 | 31.5 | 10.8  |
| 13601711 | 6.4  | 9     |
| 13601712 | 25.5 | 20.6  |
| 13601713 | 57.2 | 143.6 |
| 13601714 | 7.7  | 27.5  |
| 13601716 | 32.0 | 28.8  |
| 13601717 | 74.2 | 8.3   |
| 13601718 | 39.2 | 1.9   |
| 13601719 | 69.6 | 12.7  |
| 13601722 | 66.8 | 16.9  |
| 13601724 | 60.5 | 56.3  |
| 13601726 | 9.4  | 1     |
| 13601727 | 43.7 | 8.9   |
| 13601728 | 22.9 | 1.6   |
| 13601730 | 78.2 | 1.6   |
| 13601734 | 75.7 | 58.1  |
| 13601735 | 69.7 | 2.3   |
| 13601737 | 73.6 | 1.6   |
| 13601738 | 0.4  | 32.8  |
| 13601739 | 7.0  | 33.5  |
| 13601740 | 67.1 | 22.5  |
| 13601741 | 70.1 | 4.8   |
| 13601743 | 73.6 | 232.4 |
| 13601744 | 55.2 | 25    |
| 13601746 | 64.7 | 19.8  |
| 13601750 | 60.9 | 4.6   |
| 13601751 | 60.5 | 7.8   |
| 13601754 | 15.7 | 1.5   |
| 13601755 | 18.8 | 29    |
| 13601757 | 34.2 | 13.6  |
| 13601758 | 20.1 | 2.9   |
| 13601760 | 27.8 | 1.2   |
| 13601765 | 27.9 | 13.6  |
| 13601766 | 53.6 | 1     |
| 13601767 | 51.8 | 10.8  |
| 13601769 | 26.8 | 1     |
| 13601770 | 37.1 | 3.5   |
| 13601771 | 34.1 | 2.7   |
| 13601772 | 20.7 | 41.2  |
| 13601773 | 26.8 | 7.4   |
| 13601774 | 3.4  | 1.3   |
| 13601775 | 57.5 | 4.4   |
| 13601776 | 39.1 | 4.2   |
| 13601778 | 32.8 | 9.1   |
| 13601780 | 49.7 | 13.2  |
| 13601782 | 25.1 | 1     |
| 13601784 | 55.5 | 4.4   |
| 13601788 | 45.9 | 1.4   |

|          |      |       |
|----------|------|-------|
| 13601791 | 37.8 | 152.1 |
| 13601792 | 71.1 | 2.8   |
| 13601793 | 39.0 | 14.4  |
| 13601794 | 1.4  | 103.2 |
| 13601795 | 49.1 | 12.4  |
| 13601798 | 0.4  | 162.2 |
| 13601802 | 51.6 | 2.7   |
| 13601813 | 8.3  | 38.7  |
| 13601814 | 9.6  | 22.2  |
| 13601815 | 42.1 | 94.7  |
| 13601818 | 21.8 | 77    |
| 13601820 | 18.8 | 13.7  |
| 13601822 | 19.0 | 103   |
| 13601823 | 21.8 | 8     |
| 13601824 | 49.9 | 1     |
| 13601825 | 13.0 | 2     |
| 13601831 | 28.6 | 3.9   |
| 13601832 | 22.7 | 1.4   |
| 13601833 | 11.7 | 49.2  |
| 13601834 | 42.3 | 116   |
| 13601836 | 55.3 | 1.2   |
| 13601837 | 6.4  | 8.1   |
| 13601840 | 67.9 | 23.5  |
| 13601841 | 11.8 | 16.7  |
| 13601843 | 20.7 | 28.4  |
| 13601844 | 77.3 | 10.6  |
| 13601846 | 29.8 | 66.3  |
| 13601847 | 17.1 | 1.6   |
| 13601848 | 73.1 | 16.3  |
| 13601849 | 16.2 | 6     |
| 13601854 | 2.6  | 1     |
| 13601857 | 69.4 | 1.9   |
| 13601860 | 63.2 | 4.2   |
| 13601861 | 63.4 | 7.1   |
| 13601862 | 65.4 | 27.3  |
| 13601864 | 68.0 | 14    |
| 13601865 | 60.2 | 3.9   |
| 13601867 | 61.5 | 96    |
| 13601868 | 23.9 | 10.2  |
| 13601869 | 51.6 | 7.1   |
| 13601870 | 53.6 | 6.9   |
| 13601871 | 40.3 | 1.6   |
| 13601872 | 33.8 | 2.8   |
| 13601873 | 17.1 | 48.8  |
| 13601874 | 17.5 | 1     |
| 13601876 | 42.7 | 107.3 |
| 13601877 | 41.1 | 222.2 |
| 13601878 | 23.2 | 26    |
| 13601884 | 27.0 | 4.7   |
| 13601886 | 32.0 | 11.8  |
| 13601890 | 60.1 | 13.8  |
| 13601891 | 52.0 | 24.9  |
| 13601892 | 26.6 | 5.7   |
| 13601893 | 15.6 | 1     |
| 13601894 | 48.5 | 6.8   |
| 13601895 | 26.2 | 9.3   |
| 13601897 | 20.6 | 5.4   |

|          |      |       |
|----------|------|-------|
| 13601898 | 20.7 | 22.5  |
| 13601903 | 30.6 | 8.4   |
| 13601904 | 16.5 | 4     |
| 13601906 | 29.6 | 134.2 |
| 13601910 | 25.8 | 1.6   |
| 13601911 | 21.8 | 31.4  |
| 13601913 | 28.5 | 5.4   |
| 13601914 | 36.7 | 47.6  |
| 13601915 | 0.2  | 3.9   |
| 13601916 | 57.3 | 11    |
| 13601919 | 24.5 | 5.2   |
| 13601920 | 1.6  | 3.5   |
| 13601921 | 0.3  | 100.6 |
| 13601923 | 2.4  | 3.8   |
| 13601927 | 1.8  | 3.2   |
| 13601928 | 6.2  | 11.5  |
| 13601932 | 8.3  | 4.1   |
| 13601933 | 2.5  | 1     |
| 13601937 | 11.1 | 23.4  |
| 13601940 | 3.2  | 2.1   |
| 13601943 | 11.4 | 1     |
| 13601944 | 49.3 | 9.4   |
| 13601945 | 6.3  | 6.7   |
| 13601948 | 55.8 | 12.4  |
| 13601949 | 11.1 | 1.4   |
| 13601950 | 12.9 | 1     |
| 13601955 | 20.5 | 1     |
| 13601957 | 53.9 | 3.6   |
| 13601958 | 58.5 | 4.7   |
| 13601959 | 33.2 | 35    |
| 13601961 | 48.7 | 18.2  |
| 13601965 | 42.8 | 20.5  |
| 13601967 | 20.4 | 28.7  |
| 13601968 | 25.8 | 24.8  |
| 13601969 | 38.3 | 24.5  |
| 13601970 | 23.4 | 3.2   |
| 13601973 | 42.1 | 11.2  |
| 13601975 | 48.7 | 1     |
| 13601976 | 56.5 | 19.7  |
| 13601977 | 2.4  | 439.3 |
| 13601981 | 54.9 | 12.1  |
| 13601983 | 20.8 | 4.7   |
| 13601984 | 45.4 | 11.9  |
| 13602041 | 43.4 | 7     |
| 13602045 | 40.1 | 18.1  |
| 13602046 | 23.1 | 11.2  |
| 13602048 | 36.5 | 6.6   |
| 13602049 | 51.9 | 43.2  |
| 13602050 | 54.9 | 40.3  |
| 13602051 | 13.2 | 2.8   |
| 13602053 | 67.5 | 2.5   |
| 13602054 | 56.0 | 1.7   |
| 13602059 | 21.8 | 22.6  |
| 13602061 | 51.5 | 96.4  |
| 13602062 | 30.1 | 15.9  |
| 13602436 | 40.2 | 206.8 |
| 13602437 | 73.1 | 32.8  |

|          |      |       |
|----------|------|-------|
| 13602440 | 64.2 | 23.1  |
| 13602443 | 63.9 | 18.4  |
| 13602446 | 74.7 | 4.8   |
| 13602448 | 61.3 | 20.9  |
| 13602449 | 76.4 | 15.5  |
| 13602451 | 66.5 | 38.3  |
| 13602452 | 70.0 | 9.3   |
| 13602454 | 66.0 | 1     |
| 13602456 | 67.8 | 32.1  |
| 13602457 | 68.2 | 9.2   |
| 13602458 | 75.9 | 235.1 |
| 13602464 | 46.8 | 58.5  |
| 13602466 | 76.5 | 10.1  |
| 13602471 | 72.0 | 2.5   |
| 13602472 | 53.1 | 22.6  |
| 13602473 | 49.9 | 14.4  |
| 13602474 | 48.8 | 61.5  |
| 13602475 | 27.9 | 6.5   |
| 13602476 | 19.0 | 17.7  |
| 13602477 | 44.1 | 35.1  |
| 13602479 | 46.9 | 13.9  |
| 13602480 | 25.3 | 1     |
| 13602481 | 33.0 | 23.2  |
| 13602488 | 52.8 | 1     |
| 13602490 | 54.8 | 1.2   |
| 13602492 | 0.6  | 44.9  |
| 13602493 | 44.1 | 20.4  |
| 13602494 | 21.0 | 3.6   |
| 13602495 | 23.9 | 1     |
| 13602496 | 36.3 | 49.4  |
| 13602497 | 57.0 | 4.6   |
| 13602499 | 28.5 | 7.9   |
| 13602500 | 26.8 | 2.5   |
| 13602503 | 42.9 | 1.1   |
| 13602504 | 70.4 | 3     |
| 13602506 | 9.8  | 1     |
| 13602507 | 71.2 | 3.2   |
| 13602510 | 10.0 | 5.5   |
| 13602514 | 52.9 | 5.9   |
| 13602515 | 6.6  | 1.8   |
| 13602516 | 3.4  | 1     |
| 13602518 | 6.5  | 10.7  |
| 13602519 | 7.7  | 1     |
| 13602520 | 70.4 | 3.2   |
| 13602522 | 21.8 | 1.3   |
| 13602523 | 9.4  | 42.8  |
| 13602524 | 3.1  | 1     |
| 13602526 | 69.0 | 4.5   |
| 13602527 | 58.2 | 4.7   |
| 13602530 | 14.1 | 42.8  |
| 13602531 | 14.6 | 1     |
| 13602533 | 13.6 | 36.8  |
| 13602534 | 54.8 | 3.1   |
| 13602535 | 54.2 | 93.3  |
| 13602537 | 25.8 | 10.6  |
| 13602539 | 49.3 | 4.5   |
| 13602540 | 24.5 | 40.6  |

|          |      |       |
|----------|------|-------|
| 13602541 | 14.5 | 1     |
| 13602542 | 52.1 | 36    |
| 13602544 | 59.4 | 4.3   |
| 13602545 | 20.9 | 6.1   |
| 13602547 | 49.1 | 7.7   |
| 13602548 | 21.5 | 145.8 |
| 13602549 | 18.4 | 1.8   |
| 13602550 | 16.1 | 10.2  |
| 13602555 | 31.1 | 18.2  |
| 13602558 | 26.2 | 1     |
| 13602559 | 43.4 | 12.1  |
| 13602561 | 29.6 | 1.5   |
| 13602562 | 12.9 | 190.6 |
| 13602564 | 0.7  | 28.4  |
| 13602565 | 20.0 | 11.7  |
| 13602566 | 47.3 | 74.8  |
| 13602568 | 65.2 | 5.9   |
| 13602570 | 14.9 | 26.8  |
| 13602572 | 5.9  | 11.3  |
| 13602573 | 37.7 | 8.7   |
| 13602575 | 31.4 | 11.4  |
| 13602576 | 63.2 | 2.4   |
| 13602577 | 48.6 | 75.4  |
| 13602581 | 62.9 | 6.7   |
| 13602582 | 66.6 | 14.8  |
| 13602583 | 68.4 | 7     |
| 13602584 | 0.9  | 184.3 |
| 13602585 | 2.0  | 6     |
| 13602586 | 45.8 | 5.7   |
| 13602588 | 64.5 | 4.5   |
| 13602590 | 70.3 | 36.9  |
| 13602591 | 12.0 | 7.5   |
| 13602593 | 58.7 | 11.4  |
| 13602594 | 47.6 | 21.2  |
| 13602595 | 24.3 | 10    |
| 13602596 | 57.4 | 6.4   |
| 13602599 | 56.5 | 2.2   |
| 13602600 | 32.7 | 192.4 |
| 13602602 | 52.6 | 14.1  |
| 13602603 | 55.8 | 2.1   |
| 13602605 | 51.0 | 15.6  |
| 13602608 | 45.5 | 31.3  |
| 13602610 | 69.2 | 10.5  |
| 13602611 | 3.1  | 1     |
| 13602614 | 77.2 | 1     |
| 13602615 | 4.8  | 7.8   |
| 13602617 | 6.1  | 2.7   |
| 13602620 | 61.3 | 6.5   |
| 13602621 | 0.8  | 15.4  |
| 13602624 | 61.7 | 12.2  |
| 13602625 | 73.4 | 11.9  |
| 13602626 | 5.5  | 1     |
| 13602628 | 0.2  | 4.4   |
| 13602631 | 7.2  | 6.7   |
| 13602633 | 43.4 | 18.2  |
| 13602634 | 16.0 | 6     |
| 13602636 | 75.8 | 10.4  |



|          |      |        |
|----------|------|--------|
| 13602637 | 9.9  | 1      |
| 13602638 | 15.9 | 49.3   |
| 13602639 | 15.0 | 1      |
| 13602641 | 14.1 | 1      |
| 13602642 | 62.7 | 7.1    |
| 13602643 | 36.9 | 3.2    |
| 13602647 | 44.9 | 42.4   |
| 13602648 | 27.8 | 27     |
| 13602649 | 31.0 | 15.3   |
| 13602650 | 53.9 | 15.8   |
| 13602651 | 26.9 | 18.8   |
| 13602652 | 4.8  | 3      |
| 13602654 | 12.8 | 7.2    |
| 13602655 | 30.7 | 2.6    |
| 13602656 | 30.4 | 206.5  |
| 13602657 | 46.2 | 4.6    |
| 13602658 | 8.2  | 9.4    |
| 13602659 | 23.5 | 25.9   |
| 13602665 | 59.2 | 17     |
| 13602666 | 21.9 | 10.6   |
| 13602668 | 0.6  | 14.1   |
| 13602670 | 22.7 | 20.8   |
| 13602674 | 65.0 | 58.7   |
| 13602677 | 64.2 | 1      |
| 13602678 | 65.9 | 7.8    |
| 13602680 | 3.1  | 1      |
| 13602682 | 4.1  | 13.4   |
| 13602683 | 2.2  | 2097.9 |
| 13602684 | 40.2 | 1      |
| 13602685 | 69.7 | 15.4   |
| 13602686 | 0.9  | 26.6   |
| 13602688 | 61.3 | 9.3    |
| 13602689 | 67.2 | 14.4   |
| 13602690 | 76.7 | 27.6   |
| 13602692 | 26.7 | 15.9   |
| 13602694 | 67.7 | 1.5    |
| 13602698 | 56.7 | 25.4   |
| 13602699 | 17.2 | 33.7   |
| 13602700 | 56.8 | 9.1    |
| 13602701 | 50.6 | 9      |
| 13602702 | 27.1 | 8.3    |
| 13602703 | 53.9 | 37.5   |
| 13602704 | 42.6 | 13.1   |
| 13602706 | 26.3 | 10     |
| 13602707 | 29.9 | 5.1    |
| 13602709 | 28.3 | 11     |
| 13602710 | 41.5 | 20.1   |
| 13602711 | 51.1 | 6.2    |
| 13602713 | 30.5 | 3.2    |
| 13602714 | 29.0 | 19.1   |
| 13602715 | 21.1 | 102.8  |
| 13602716 | 22.9 | 9.6    |
| 13602717 | 56.3 | 33.3   |
| 13602718 | 48.2 | 15.7   |
| 13602720 | 3.6  | 1      |
| 13602721 | 65.9 | 40.5   |
| 13602722 | 23.4 | 15.1   |

|          |      |       |
|----------|------|-------|
| 13602724 | 19.4 | 2.2   |
| 13602725 | 35.8 | 8.2   |
| 13602727 | 64.7 | 5.2   |
| 13602728 | 3.3  | 1     |
| 13602729 | 17.4 | 4.1   |
| 13602732 | 57.4 | 50.4  |
| 13602734 | 66.7 | 58.7  |
| 13602736 | 20.7 | 1.7   |
| 13602742 | 1.3  | 15.8  |
| 13602744 | 11.5 | 3.1   |
| 13602746 | 65.6 | 1     |
| 13602750 | 9.6  | 2.7   |
| 13602753 | 5.3  | 5.6   |
| 13602755 | 76.1 | 10    |
| 13602756 | 61.2 | 28    |
| 13602758 | 16.0 | 51.9  |
| 13602760 | 68.0 | 28.9  |
| 13602761 | 9.3  | 4.7   |
| 13602763 | 29.5 | 68.6  |
| 13602764 | 48.9 | 177.1 |
| 13602765 | 1.2  | 37.4  |
| 13602766 | 59.8 | 14.5  |
| 13602767 | 51.2 | 1.7   |
| 13602768 | 19.8 | 4.2   |
| 13602769 | 37.2 | 94.9  |
| 13602770 | 54.6 | 8.6   |
| 13602772 | 49.2 | 4.5   |
| 13602778 | 21.8 | 18.6  |
| 13602779 | 51.5 | 4.1   |
| 13602781 | 52.6 | 14.1  |
| 13602784 | 23.7 | 6.3   |
| 13602788 | 55.8 | 1.8   |
| 13602789 | 54.3 | 70.9  |
| 13602791 | 2.1  | 13.8  |
| 13602792 | 22.0 | 19.6  |
| 13602793 | 42.1 | 22.6  |
| 13602795 | 12.9 | 31    |
| 13602798 | 30.2 | 2     |
| 13602800 | 78.9 | 6.1   |
| 13602801 | 67.3 | 49.9  |
| 13602803 | 63.2 | 4.2   |
| 13602804 | 41.7 | 108.9 |
| 13602806 | 63.0 | 10.3  |
| 13602808 | 2.5  | 1     |
| 13602809 | 65.0 | 8.2   |
| 13602810 | 73.6 | 3.2   |
| 13602812 | 71.4 | 14.4  |
| 13602815 | 3.5  | 1.1   |
| 13602817 | 62.2 | 8.7   |
| 13602820 | 76.1 | 68.6  |
| 13602821 | 14.5 | 1     |
| 13602822 | 11.9 | 7.7   |
| 13602823 | 66.7 | 2.4   |
| 13602825 | 46.3 | 6.4   |
| 13602826 | 13.3 | 17.8  |
| 13602827 | 23.7 | 37.5  |
| 13602829 | 25.9 | 10.1  |

|          |      |       |
|----------|------|-------|
| 13602832 | 22.2 | 1     |
| 13602833 | 55.5 | 1.4   |
| 13602838 | 53.9 | 18.9  |
| 13602844 | 46.5 | 3.2   |
| 13602845 | 22.8 | 191   |
| 13602846 | 55.7 | 8.6   |
| 13602847 | 38.8 | 21.1  |
| 13602848 | 23.0 | 65    |
| 13602849 | 42.2 | 3.7   |
| 13602851 | 46.0 | 40.8  |
| 13602853 | 5.0  | 2.5   |
| 13602856 | 57.5 | 50.6  |
| 13602858 | 5.8  | 4     |
| 13602859 | 2.0  | 13.9  |
| 13602861 | 1.0  | 108.8 |
| 13602862 | 78.5 | 13.2  |
| 13602865 | 66.5 | 6.4   |
| 13602871 | 4.7  | 143.5 |
| 13602872 | 11.5 | 1     |
| 13602875 | 11.2 | 8.3   |
| 13602876 | 10.8 | 1     |
| 13602877 | 5.8  | 5.2   |
| 13602878 | 6.0  | 9.8   |
| 13602883 | 10.9 | 17.7  |
| 13602884 | 76.1 | 21.5  |
| 13602885 | 12.6 | 1     |
| 13602886 | 9.9  | 1     |
| 13602887 | 16.5 | 1     |
| 13602889 | 16.7 | 6.7   |
| 13602890 | 32.4 | 10.5  |
| 13602891 | 26.8 | 1.8   |
| 13602892 | 58.1 | 53.6  |
| 13602896 | 25.8 | 8.8   |
| 13602897 | 45.3 | 11.4  |
| 13602899 | 25.0 | 1     |
| 13602900 | 0.6  | 28.9  |
| 13602901 | 47.6 | 20.2  |
| 13602904 | 49.4 | 6.6   |
| 13602905 | 26.3 | 179.2 |
| 13602906 | 59.5 | 40.3  |
| 13602908 | 17.7 | 15.6  |
| 13602909 | 57.6 | 1     |
| 13602911 | 56.6 | 11.7  |
| 13602912 | 27.2 | 1     |
| 13602913 | 58.7 | 114.1 |
| 13602915 | 43.9 | 4.2   |
| 13602916 | 13.0 | 26.9  |
| 13602919 | 32.1 | 5.1   |
| 13602920 | 17.7 | 1.9   |
| 13602921 | 31.5 | 1     |
| 13602923 | 43.2 | 5.3   |
| 13602925 | 58.5 | 5.2   |
| 13602926 | 33.7 | 1.1   |
| 13602929 | 56.8 | 5.9   |
| 13602931 | 30.7 | 24.8  |
| 13602932 | 29.0 | 15.2  |
| 13602933 | 28.9 | 29.9  |

|          |      |       |
|----------|------|-------|
| 13602934 | 43.7 | 1     |
| 13602935 | 51.6 | 4     |
| 13602938 | 11.8 | 236   |
| 13602941 | 6.9  | 40.4  |
| 13602942 | 27.7 | 3.4   |
| 13602945 | 7.4  | 1     |
| 13602946 | 60.4 | 29.7  |
| 13603021 | 46.0 | 1.6   |
| 13603022 | 56.7 | 36.5  |
| 13603023 | 42.6 | 68.1  |
| 13603024 | 66.6 | 1     |
| 13603026 | 33.5 | 4.6   |
| 13603027 | 26.1 | 4.1   |
| 13603031 | 45.6 | 12    |
| 13603032 | 9.8  | 1     |
| 13603033 | 0.9  | 124.6 |
| 13603034 | 62.4 | 80.1  |
| 13603035 | 38.3 | 5     |
| 13603036 | 52.2 | 14.6  |
| 13603129 | 60.9 | 1.1   |
| 13603130 | 0.2  | 1     |
| 13603131 | 60.9 | 10.5  |
| 13603132 | 66.7 | 2.6   |
| 13603135 | 76.7 | 1     |
| 13603139 | 61.2 | 61.6  |
| 13603142 | 0.3  | 32.8  |
| 13603143 | 0.2  | 1     |
| 13603146 | 67.9 | 515.4 |
| 13603148 | 61.4 | 103   |
| 13603150 | 0.9  | 8.6   |
| 13603152 | 0.3  | 12.1  |
| 13603153 | 74.6 | 2.3   |
| 13603154 | 19.1 | 14.3  |
| 13603158 | 60.6 | 2.2   |
| 13603159 | 4.2  | 84.2  |
| 13603162 | 61.9 | 23    |
| 13603163 | 13.1 | 29.5  |
| 13603164 | 15.1 | 2     |
| 13603167 | 15.1 | 1.3   |
| 13603168 | 14.3 | 20.7  |
| 13603169 | 12.4 | 5.9   |
| 13603170 | 72.0 | 6.5   |
| 13603171 | 12.8 | 28.6  |
| 13603172 | 67.3 | 17    |
| 13603174 | 6.7  | 2.2   |
| 13603176 | 65.4 | 5.9   |
| 13603178 | 40.7 | 27.1  |
| 13603179 | 55.1 | 16    |
| 13603180 | 28.9 | 35.5  |
| 13603186 | 63.7 | 14.4  |
| 13603187 | 47.6 | 1.3   |
| 13603188 | 20.1 | 19.7  |
| 13603189 | 59.9 | 9     |
| 13603192 | 34.9 | 60.2  |
| 13603193 | 52.0 | 6.2   |
| 13603197 | 12.2 | 6.7   |
| 13603201 | 13.3 | 32.4  |

|          |      |       |
|----------|------|-------|
| 13603202 | 14.3 | 14.9  |
| 13603204 | 62.2 | 18.6  |
| 13603205 | 24.9 | 9.8   |
| 13603206 | 23.3 | 8.3   |
| 13603209 | 71.6 | 105.4 |
| 13603214 | 9.3  | 46.4  |
| 13603215 | 3.3  | 4.6   |
| 13603216 | 48.8 | 33.9  |
| 13603220 | 10.4 | 21.9  |
| 13603221 | 69.1 | 22.8  |
| 13603222 | 77.3 | 65.2  |
| 13603223 | 9.2  | 13.5  |
| 13603227 | 6.6  | 6.9   |
| 13603233 | 7.2  | 1.7   |
| 13603234 | 11.2 | 26.9  |
| 13603236 | 69.4 | 5.7   |
| 13603242 | 55.5 | 4.2   |
| 13603243 | 29.4 | 5.8   |
| 13603244 | 38.7 | 7.1   |
| 13603245 | 0.9  | 1     |
| 13603248 | 58.4 | 55.8  |
| 13603250 | 29.6 | 9.2   |
| 13603251 | 25.8 | 12.4  |
| 13603252 | 6.2  | 2     |
| 13603254 | 28.4 | 283.3 |
| 13603256 | 41.4 | 150.8 |
| 13603257 | 40.9 | 8     |
| 13603258 | 56.3 | 51.8  |
| 13603260 | 55.7 | 1     |
| 13603263 | 34.3 | 20.6  |
| 13603264 | 43.2 | 2.8   |
| 13603265 | 14.1 | 21.2  |
| 13603267 | 32.5 | 11.1  |
| 13603269 | 20.5 | 2.9   |
| 13603270 | 49.0 | 139   |
| 13603271 | 20.9 | 33.2  |
| 13603272 | 35.2 | 4.2   |
| 13603274 | 51.9 | 12.3  |
| 13603276 | 31.3 | 1     |
| 13603278 | 55.4 | 17.2  |
| 13603281 | 26.5 | 3.1   |
| 13603282 | 53.4 | 4.1   |
| 13603284 | 3.2  | 1.4   |
| 13603309 | 68.4 | 15.5  |
| 13603311 | 62.1 | 6.4   |
| 13603312 | 3.3  | 1     |
| 13603313 | 52.3 | 4.7   |
| 13603314 | 40.3 | 18.3  |
| 13603315 | 61.3 | 16.3  |
| 13603316 | 52.6 | 13.8  |
| 13603317 | 28.5 | 19.3  |
| 13603322 | 73.3 | 13.1  |
| 13603324 | 78.9 | 1     |
| 13603325 | 64.0 | 32    |
| 13603326 | 61.0 | 17.4  |
| 13603327 | 68.3 | 2.6   |
| 13603331 | 70.6 | 26.8  |

|          |      |       |
|----------|------|-------|
| 13603332 | 70.0 | 32.5  |
| 13603333 | 67.0 | 1     |
| 13603339 | 14.3 | 1.2   |
| 13603340 | 14.8 | 1.3   |
| 13603341 | 0.6  | 79.9  |
| 13603342 | 66.3 | 8.7   |
| 13603345 | 65.1 | 82.6  |
| 13603346 | 73.8 | 197.1 |
| 13603347 | 15.0 | 12.8  |
| 13603348 | 65.0 | 21.6  |
| 13603349 | 73.2 | 2     |
| 13603351 | 72.3 | 18.6  |
| 13603354 | 60.5 | 123.1 |
| 13603357 | 57.4 | 6.4   |
| 13603358 | 32.6 | 1     |
| 13603359 | 18.9 | 1     |
| 13603360 | 11.7 | 3.2   |
| 13603363 | 39.3 | 18.3  |
| 13603364 | 43.4 | 14.6  |
| 13603366 | 52.6 | 18.9  |
| 13603372 | 39.7 | 2.9   |
| 13603373 | 51.3 | 15.2  |
| 13603375 | 54.7 | 1     |
| 13603376 | 53.6 | 3.7   |
| 13603377 | 46.4 | 18.7  |
| 13603380 | 33.8 | 56.1  |
| 13603381 | 45.4 | 17.5  |
| 13603382 | 30.1 | 4.3   |
| 13603383 | 24.6 | 1     |
| 13603384 | 27.5 | 1.5   |
| 13603386 | 44.5 | 3.7   |
| 13603387 | 55.2 | 59.8  |
| 13603388 | 28.3 | 39    |
| 13603390 | 26.6 | 59.8  |
| 13603391 | 23.6 | 11.2  |
| 13603392 | 19.0 | 30.2  |
| 13603393 | 46.1 | 6.6   |
| 13603394 | 17.7 | 33.9  |
| 13603395 | 25.3 | 9.6   |
| 13603396 | 36.3 | 3.6   |
| 13603397 | 28.6 | 2.5   |
| 13603400 | 34.8 | 93.3  |
| 13603403 | 67.0 | 21.3  |
| 13603404 | 64.3 | 17.2  |
| 13603405 | 9.5  | 1     |
| 13603406 | 7.5  | 2.5   |
| 13603407 | 35.2 | 23.8  |
| 13603408 | 39.3 | 1     |
| 13603409 | 69.0 | 37.4  |
| 13603411 | 8.9  | 1     |
| 13603413 | 68.4 | 12.2  |
| 13603415 | 2.5  | 4.2   |
| 13603416 | 6.1  | 2.6   |
| 13603418 | 0.6  | 13.3  |
| 13603423 | 34.4 | 50.2  |
| 13603425 | 14.9 | 1.6   |
| 13603427 | 17.0 | 21.7  |

|          |      |       |
|----------|------|-------|
| 13603428 | 8.7  | 15.3  |
| 13603429 | 3.3  | 2.2   |
| 13603432 | 67.4 | 21.6  |
| 13603433 | 77.2 | 4.4   |
| 13603434 | 63.4 | 1.9   |
| 13603435 | 63.9 | 21.4  |
| 13603436 | 6.5  | 2.3   |
| 13603437 | 45.5 | 53.6  |
| 13603438 | 10.8 | 1     |
| 13603439 | 64.7 | 37.5  |
| 13603440 | 24.6 | 22    |
| 13603441 | 41.0 | 441.5 |
| 13603443 | 43.5 | 65.2  |
| 13603444 | 13.7 | 1     |
| 13603445 | 23.0 | 19.6  |
| 13603447 | 53.1 | 2.3   |
| 13603449 | 21.2 | 162.6 |
| 13603451 | 56.5 | 7.3   |
| 13603453 | 24.6 | 36.7  |
| 13603457 | 49.7 | 3.3   |
| 13603460 | 27.1 | 2     |
| 13603462 | 17.7 | 17.6  |
| 13603463 | 42.4 | 5.1   |
| 13603465 | 30.8 | 2     |
| 13603466 | 23.4 | 25.9  |
| 13603467 | 41.1 | 15.4  |
| 13603469 | 14.1 | 8.2   |
| 13603471 | 15.2 | 4.9   |
| 13603475 | 67.8 | 7.2   |
| 13603477 | 56.0 | 5.2   |
| 13603478 | 1.3  | 27.2  |
| 13603479 | 6.6  | 1     |
| 13603481 | 7.4  | 8.1   |
| 13603482 | 0.6  | 28.2  |
| 13603484 | 10.6 | 3.6   |
| 13603485 | 6.8  | 11.6  |
| 13603487 | 63.4 | 7.3   |
| 13603488 | 12.0 | 2.6   |
| 13603492 | 72.2 | 17.8  |
| 13603494 | 25.3 | 2.8   |
| 13603497 | 65.7 | 12.5  |
| 13603498 | 60.1 | 43.4  |
| 13603499 | 35.7 | 4.3   |
| 13603500 | 7.0  | 1.5   |
| 13603501 | 78.6 | 3.8   |
| 13603502 | 57.7 | 23.6  |
| 13603503 | 25.7 | 3.2   |
| 13603504 | 1.4  | 61.3  |
| 13603505 | 18.4 | 10.2  |
| 13603506 | 29.0 | 65.6  |
| 13603508 | 8.9  | 2.6   |
| 13603511 | 27.8 | 6     |
| 13603513 | 26.7 | 18.3  |
| 13603517 | 51.5 | 21.8  |
| 13603518 | 27.9 | 30.4  |
| 13603519 | 18.2 | 4.6   |
| 13603525 | 59.3 | 1     |

|          |      |       |
|----------|------|-------|
| 13603526 | 12.0 | 9.7   |
| 13603529 | 43.4 | 2.2   |
| 13603530 | 26.8 | 3.2   |
| 13603532 | 21.6 | 10.8  |
| 13603534 | 17.8 | 2.3   |
| 13603536 | 20.1 | 2.3   |
| 13603540 | 54.5 | 4.5   |
| 13603542 | 42.3 | 46.4  |
| 13603544 | 53.6 | 4.1   |
| 13603545 | 37.9 | 8     |
| 13603547 | 34.0 | 49.4  |
| 13603548 | 32.7 | 1.4   |
| 13603549 | 29.4 | 4.6   |
| 13603551 | 50.7 | 25.3  |
| 13603552 | 23.7 | 4.6   |
| 13603553 | 27.8 | 7.4   |
| 13603554 | 35.7 | 5.4   |
| 13603555 | 24.9 | 8.2   |
| 13603556 | 30.2 | 15.3  |
| 13603557 | 39.5 | 1     |
| 13603558 | 1.2  | 17    |
| 13603560 | 43.1 | 6.4   |
| 13603564 | 60.0 | 7.7   |
| 13603566 | 60.6 | 107.3 |
| 13603569 | 74.9 | 13.1  |
| 13603570 | 14.5 | 1     |
| 13603571 | 14.7 | 3.6   |
| 13603573 | 13.9 | 81.3  |
| 13603575 | 15.9 | 32.8  |
| 13603576 | 29.4 | 6.2   |
| 13603584 | 0.9  | 26    |
| 13603585 | 64.2 | 15.1  |
| 13603586 | 64.2 | 24.5  |
| 13603587 | 28.5 | 4     |
| 13603588 | 0.3  | 35.2  |
| 13603589 | 67.9 | 2.9   |
| 13603590 | 59.5 | 62.5  |
| 13603595 | 40.2 | 3.4   |
| 13603596 | 40.8 | 17.8  |
| 13603597 | 16.8 | 1     |
| 13603598 | 25.1 | 1     |
| 13603599 | 55.9 | 6.5   |
| 13603602 | 4.3  | 2.2   |
| 13603607 | 57.1 | 3.1   |
| 13603613 | 38.9 | 4.3   |
| 13603615 | 31.7 | 13.2  |
| 13603616 | 1.0  | 202.6 |
| 13603618 | 1.4  | 142.3 |
| 13603623 | 77.2 | 2.3   |
| 13603624 | 35.1 | 1.2   |
| 13603627 | 77.0 | 75.3  |
| 13603628 | 62.7 | 7     |
| 13603630 | 59.1 | 21.5  |
| 13603631 | 42.2 | 26.7  |
| 13603633 | 76.8 | 83.9  |
| 13603635 | 40.0 | 1.7   |
| 13603636 | 40.1 | 11.7  |



|          |      |       |
|----------|------|-------|
| 13603638 | 62.9 | 7.1   |
| 13603639 | 39.3 | 1     |
| 13603641 | 75.2 | 14.7  |
| 13603642 | 64.5 | 1.5   |
| 13603644 | 61.0 | 111.6 |
| 13603645 | 71.3 | 12.3  |
| 13603647 | 75.7 | 28.3  |
| 13603648 | 78.1 | 67.6  |
| 13603649 | 26.2 | 1     |
| 13603651 | 69.4 | 13.9  |
| 13603654 | 76.3 | 411.4 |
| 13603662 | 62.8 | 55.6  |
| 13603663 | 72.2 | 1.6   |
| 13603664 | 37.3 | 7.8   |
| 13603668 | 64.8 | 15.5  |
| 13603669 | 20.1 | 1.9   |
| 13603671 | 48.0 | 2.6   |
| 13603672 | 12.0 | 1.1   |
| 13603674 | 26.4 | 1.1   |
| 13603675 | 23.5 | 6.7   |
| 13603679 | 1.2  | 180.9 |
| 13603681 | 28.2 | 3.2   |
| 13603683 | 47.6 | 3.2   |
| 13603684 | 26.4 | 7.6   |
| 13603687 | 26.8 | 5.2   |
| 13603688 | 26.3 | 4.6   |
| 13603690 | 4.1  | 8.8   |
| 13603691 | 49.8 | 8.6   |
| 13603692 | 19.7 | 7.6   |
| 13603693 | 26.8 | 9.9   |
| 13603694 | 0.2  | 6.3   |
| 13603695 | 69.3 | 20.3  |
| 13603698 | 20.9 | 1.1   |
| 13603699 | 25.3 | 1.4   |
| 13603700 | 23.5 | 49.4  |
| 13603701 | 58.9 | 17.8  |
| 13603702 | 0.8  | 18    |
| 13603703 | 50.1 | 30.4  |
| 13603705 | 18.3 | 1     |
| 13603708 | 28.0 | 7.4   |
| 13603709 | 17.1 | 34.5  |
| 13603710 | 62.0 | 18.2  |
| 13603711 | 22.6 | 4.8   |
| 13603718 | 69.3 | 1.1   |
| 13603720 | 28.3 | 13    |
| 13603721 | 23.9 | 28.5  |
| 13603724 | 55.5 | 8.6   |
| 13603725 | 9.0  | 119.7 |
| 13603726 | 26.6 | 4.2   |
| 13603727 | 4.6  | 75.1  |
| 13603728 | 76.0 | 51.2  |
| 13603730 | 0.9  | 40.4  |
| 13603731 | 6.8  | 3.2   |
| 13603732 | 68.7 | 1.6   |
| 13603735 | 33.1 | 13.6  |
| 13603736 | 71.3 | 1     |
| 13603737 | 78.4 | 2     |

|          |      |       |
|----------|------|-------|
| 13603739 | 8.0  | 10.6  |
| 13603740 | 5.0  | 1     |
| 13603745 | 14.2 | 4.7   |
| 13603747 | 67.7 | 34.6  |
| 13603748 | 44.1 | 156.8 |
| 13603749 | 42.7 | 5.3   |
| 13603751 | 69.3 | 2     |
| 13603752 | 34.3 | 57.5  |
| 13603753 | 48.2 | 6     |
| 13603754 | 11.3 | 11.2  |
| 13603755 | 8.8  | 1     |
| 13603757 | 46.1 | 37.3  |
| 13603760 | 3.6  | 2     |
| 13603761 | 4.8  | 5.1   |
| 13603764 | 26.3 | 20.3  |
| 13603766 | 32.1 | 122.4 |
| 13603768 | 52.3 | 10.3  |
| 13603769 | 18.1 | 945.7 |
| 13603771 | 34.1 | 28.2  |
| 13603772 | 50.9 | 8.7   |
| 13603774 | 20.2 | 31.2  |
| 13603776 | 22.8 | 7.4   |
| 13603779 | 32.4 | 3.5   |
| 13603781 | 28.8 | 1     |
| 13603783 | 27.4 | 12.1  |
| 13603785 | 59.5 | 4.6   |
| 13603786 | 18.0 | 7.4   |
| 13603787 | 4.5  | 32    |
| 13603791 | 33.2 | 74.5  |
| 13603793 | 22.5 | 14    |
| 13603796 | 20.5 | 9.4   |
| 13603800 | 59.4 | 3.7   |
| 13603801 | 65.3 | 2.9   |
| 13603803 | 76.7 | 5.5   |
| 13603804 | 40.3 | 16.8  |
| 13603805 | 64.5 | 7.1   |
| 13603806 | 76.8 | 9.4   |
| 13603810 | 61.3 | 33.3  |
| 13603812 | 69.7 | 50.3  |
| 13603815 | 23.9 | 8.4   |
| 13603818 | 32.1 | 21    |
| 13603819 | 0.7  | 20.9  |
| 13603820 | 66.2 | 20.1  |
| 13603821 | 46.6 | 14.4  |
| 13603825 | 78.3 | 3.5   |
| 13603826 | 47.5 | 38.6  |
| 13603827 | 66.2 | 25.1  |
| 13603829 | 75.7 | 13.8  |
| 13603831 | 16.6 | 165.6 |
| 13603833 | 71.0 | 42.1  |
| 13603834 | 68.8 | 1.3   |
| 13603836 | 61.7 | 1     |
| 13603838 | 28.2 | 8.4   |
| 13603839 | 66.6 | 1     |
| 13603840 | 52.7 | 36.6  |
| 13603842 | 28.2 | 12.7  |
| 13603844 | 43.6 | 21.9  |

|          |      |       |
|----------|------|-------|
| 13603845 | 46.7 | 32.5  |
| 13603846 | 21.1 | 20.1  |
| 13603847 | 38.5 | 1     |
| 13603848 | 21.8 | 4.5   |
| 13603849 | 23.8 | 17    |
| 13603852 | 25.1 | 23.2  |
| 13603853 | 59.6 | 2.3   |
| 13603855 | 54.2 | 1.5   |
| 13603856 | 50.7 | 12    |
| 13603857 | 49.4 | 23.7  |
| 13603860 | 68.2 | 2.6   |
| 13603861 | 67.8 | 8.9   |
| 13603863 | 67.8 | 23.5  |
| 13603864 | 37.6 | 1     |
| 13603865 | 22.8 | 83.3  |
| 13603866 | 49.3 | 25.1  |
| 13603867 | 41.8 | 10.9  |
| 13603870 | 1.3  | 15.9  |
| 13603878 | 0.8  | 2.9   |
| 13603886 | 17.9 | 16.1  |
| 13603890 | 42.1 | 131.4 |
| 13603895 | 8.1  | 5.4   |
| 13603897 | 10.2 | 19.6  |
| 13603899 | 73.5 | 9.6   |
| 13603900 | 10.7 | 3.1   |
| 13603901 | 6.5  | 2.4   |
| 13603902 | 5.5  | 24.7  |
| 13603906 | 49.5 | 6.3   |
| 13603907 | 1.6  | 8.8   |
| 13603908 | 44.4 | 8     |
| 13603909 | 27.5 | 53.4  |
| 13603910 | 45.2 | 2.5   |
| 13603911 | 63.5 | 4.9   |
| 13603913 | 48.6 | 7     |
| 13603915 | 46.0 | 95.3  |
| 13603917 | 18.7 | 6     |
| 13603919 | 70.5 | 86.5  |
| 13603922 | 76.5 | 1     |
| 13603924 | 33.6 | 24.8  |
| 13603925 | 47.2 | 37.2  |
| 13603926 | 35.6 | 1     |
| 13603928 | 16.3 | 14.7  |
| 13603930 | 72.6 | 6.8   |
| 13603931 | 35.2 | 9.3   |
| 13603932 | 27.3 | 18    |
| 13603933 | 40.5 | 13.2  |
| 13603934 | 39.8 | 12.5  |
| 13603940 | 58.6 | 24.3  |
| 13603942 | 20.5 | 32    |
| 13603943 | 72.6 | 4.1   |
| 13603944 | 21.0 | 1     |
| 13603947 | 37.8 | 14.9  |
| 13603956 | 14.2 | 11.6  |
| 13603970 | 4.8  | 12.9  |
| 13603972 | 59.9 | 16.6  |
| 13603994 | 2.1  | 1.7   |
| 13604033 | 6.6  | 12    |

|          |      |       |
|----------|------|-------|
| 13604057 | 12.9 | 2.7   |
| 13604072 | 62.7 | 50    |
| 13604078 | 28.3 | 3.1   |
| 13604096 | 71.6 | 28.9  |
| 13604103 | 75.3 | 7.8   |
| 13604110 | 14.3 | 2.5   |
| 13604111 | 66.1 | 4     |
| 13604122 | 62.7 | 17.1  |
| 13604129 | 54.3 | 9.4   |
| 13604135 | 73.4 | 46.2  |
| 13604138 | 37.3 | 12.1  |
| 13604162 | 8.7  | 9.8   |
| 13604172 | 74.3 | 6.6   |
| 13604173 | 16.9 | 1.9   |
| 13604176 | 51.5 | 24.9  |
| 13604179 | 29.8 | 1.2   |
| 13604182 | 27.4 | 10.6  |
| 13604191 | 5.5  | 9.4   |
| 13604208 | 54.4 | 10.5  |
| 13604212 | 28.2 | 16.9  |
| 13604218 | 17.8 | 2.9   |
| 13604219 | 28.2 | 6.2   |
| 13604222 | 56.8 | 33.7  |
| 13604223 | 12.6 | 4.1   |
| 13604224 | 64.3 | 7.7   |
| 13604237 | 0.7  | 25.4  |
| 13604242 | 10.9 | 161.5 |
| 13604243 | 37.4 | 39.9  |
| 13604293 | 69.9 | 12.8  |
| 13604295 | 42.5 | 45.9  |
| 13604296 | 1.0  | 35.8  |
| 13604301 | 0.8  | 158.9 |
| 13604302 | 19.1 | 9.2   |
| 13604303 | 31.6 | 13.7  |
| 13604304 | 46.8 | 1.8   |
| 13604305 | 18.5 | 9.7   |
| 13604306 | 41.9 | 65.5  |
| 13604308 | 56.9 | 1     |
| 13604311 | 60.6 | 1     |
| 13604315 | 55.0 | 4.7   |
| 13604323 | 2.5  | 10.5  |
| 13604337 | 18.7 | 19.7  |
| 13604352 | 72.3 | 2.6   |
| 13604357 | 25.3 | 2.2   |
| 13604360 | 63.0 | 5     |
| 13604367 | 49.7 | 107.7 |
| 13604369 | 50.3 | 54.9  |
| 13604370 | 53.2 | 13.1  |
| 13604371 | 26.3 | 2.3   |
| 13604372 | 36.2 | 12.2  |
| 13604374 | 68.5 | 28.4  |
| 13604375 | 70.1 | 23.8  |
| 13604376 | 67.8 | 23.4  |
| 13604381 | 64.7 | 14.2  |
| 13604382 | 60.1 | 2.5   |
| 13604383 | 67.9 | 7     |
| 13604386 | 16.0 | 1.2   |

|          |      |       |
|----------|------|-------|
| 13604388 | 16.1 | 1     |
| 13604389 | 13.0 | 43.9  |
| 13604390 | 41.7 | 4.1   |
| 13604391 | 7.2  | 2.1   |
| 13604392 | 7.1  | 1.7   |
| 13604393 | 32.7 | 14.7  |
| 13604395 | 54.5 | 53.6  |
| 13604396 | 20.4 | 3.9   |
| 13604398 | 42.4 | 19.2  |
| 13604399 | 19.3 | 16.1  |
| 13604400 | 71.3 | 8.1   |
| 13604401 | 5.7  | 556.5 |
| 13604403 | 23.1 | 25.4  |
| 13604406 | 35.3 | 11.9  |
| 13604408 | 35.0 | 9.3   |
| 13604411 | 26.7 | 4.9   |
| 13604412 | 12.6 | 10    |
| 13604414 | 39.7 | 5     |
| 13604415 | 21.3 | 6.1   |
| 13604417 | 34.7 | 15.8  |
| 13604418 | 28.2 | 1.1   |
| 13604420 | 8.9  | 1.3   |
| 13604421 | 24.5 | 1     |
| 13604422 | 43.5 | 29    |
| 13604423 | 57.7 | 12.6  |
| 13604426 | 20.7 | 1.9   |
| 13604427 | 4.0  | 1     |
| 13604428 | 14.1 | 15.2  |
| 13604434 | 39.4 | 3.6   |
| 13604436 | 51.6 | 14.9  |
| 13604437 | 18.7 | 1     |
| 13604439 | 33.8 | 4     |
| 13604440 | 5.2  | 5.9   |
| 13604441 | 43.3 | 75.1  |
| 13604442 | 60.7 | 55.8  |
| 13604445 | 12.0 | 1.7   |
| 13604446 | 23.4 | 1.7   |
| 13604447 | 68.3 | 1.6   |
| 13604450 | 39.6 | 21.5  |
| 13604451 | 5.0  | 6.1   |
| 13604453 | 1.0  | 106.5 |
| 13604454 | 74.1 | 2.7   |
| 13604455 | 67.5 | 10.1  |
| 13604456 | 62.4 | 63.5  |
| 13604461 | 1.1  | 119.1 |
| 13604470 | 60.0 | 7.2   |
| 13604471 | 12.0 | 29    |
| 13604473 | 10.2 | 8     |
| 13604475 | 27.4 | 1     |
| 13604477 | 59.5 | 9.4   |
| 13604478 | 37.7 | 3.6   |
| 13604479 | 9.5  | 59.6  |
| 13604480 | 21.0 | 100   |
| 13604482 | 30.1 | 16.3  |
| 13604483 | 56.5 | 14.7  |
| 13604484 | 31.9 | 1     |
| 13604486 | 33.0 | 11.2  |

|          |      |       |
|----------|------|-------|
| 13604488 | 59.1 | 6.3   |
| 13604489 | 31.3 | 38.6  |
| 13604490 | 21.5 | 1     |
| 13604495 | 18.0 | 11.1  |
| 13604496 | 18.9 | 1     |
| 13604498 | 13.2 | 2.9   |
| 13604500 | 36.5 | 18.2  |
| 13604501 | 32.6 | 14.8  |
| 13604502 | 53.0 | 18.2  |
| 13604504 | 43.7 | 3.7   |
| 13604505 | 77.3 | 3.6   |
| 13604506 | 66.2 | 2.8   |
| 13604509 | 61.0 | 30    |
| 13604510 | 50.6 | 9.6   |
| 13604511 | 36.4 | 8.5   |
| 13604512 | 38.5 | 2.2   |
| 13604515 | 68.9 | 35.5  |
| 13604517 | 66.6 | 30.9  |
| 13604518 | 21.8 | 1     |
| 13604520 | 0.7  | 12.3  |
| 13604521 | 48.3 | 11.6  |
| 13604522 | 21.6 | 2.8   |
| 13604523 | 75.7 | 11    |
| 13604525 | 78.0 | 4.8   |
| 13604528 | 39.6 | 684.2 |
| 13604530 | 27.5 | 1.9   |
| 13604532 | 77.3 | 28.4  |
| 13604533 | 61.2 | 7.6   |
| 13604535 | 55.5 | 184.8 |
| 13604536 | 66.8 | 25    |
| 13604539 | 61.0 | 9     |
| 13604541 | 40.8 | 12.1  |
| 13604542 | 59.7 | 16.5  |
| 13604544 | 49.2 | 1.9   |
| 13604545 | 39.9 | 6.9   |
| 13604547 | 13.9 | 3.7   |
| 13604551 | 46.2 | 13.2  |
| 13604552 | 9.1  | 1     |
| 13604553 | 29.9 | 29.4  |
| 13604557 | 29.2 | 1     |
| 13604559 | 26.4 | 87.7  |
| 13604560 | 0.6  | 26.9  |
| 13604561 | 21.0 | 51.7  |
| 13604562 | 20.3 | 81.5  |
| 13604566 | 44.5 | 22    |
| 13604569 | 25.8 | 49.7  |
| 13604573 | 76.4 | 6.5   |
| 13604574 | 39.8 | 11.7  |
| 13604575 | 39.8 | 4.7   |
| 13604577 | 36.2 | 9.8   |
| 13604579 | 35.3 | 26.2  |
| 13604584 | 15.3 | 10.2  |
| 13604586 | 38.1 | 24.9  |
| 13604587 | 60.6 | 11.9  |
| 13604591 | 31.4 | 1.7   |
| 13604592 | 0.3  | 3.1   |
| 13604593 | 1.2  | 88    |

|          |      |       |
|----------|------|-------|
| 13604594 | 4.8  | 106.9 |
| 13604595 | 54.9 | 1.7   |
| 13604597 | 50.2 | 109   |
| 13604598 | 2.5  | 1     |
| 13604602 | 73.4 | 26.8  |
| 13604611 | 11.6 | 1     |
| 13604613 | 4.7  | 1.1   |
| 13604616 | 78.2 | 7.1   |
| 13604617 | 75.9 | 7.6   |
| 13604619 | 12.1 | 2.4   |
| 13604620 | 62.3 | 63.8  |
| 13604623 | 36.1 | 42.1  |
| 13604624 | 34.9 | 13.5  |
| 13604627 | 55.4 | 3     |
| 13604628 | 21.1 | 1.1   |
| 13604629 | 33.9 | 5.6   |
| 13604632 | 49.6 | 11.7  |
| 13604647 | 48.6 | 31.5  |
| 13604649 | 28.2 | 4.2   |
| 13604651 | 58.8 | 11.6  |
| 13604652 | 17.6 | 5.3   |
| 13604655 | 40.4 | 1.9   |
| 13604656 | 61.7 | 2.3   |
| 13604658 | 68.9 | 10.6  |
| 13604660 | 72.5 | 11.7  |
| 13604661 | 0.3  | 7.8   |
| 13604663 | 61.1 | 5.4   |
| 13604665 | 64.3 | 6.1   |
| 13604667 | 67.8 | 67.8  |
| 13604669 | 1.9  | 9.6   |
| 13604670 | 29.8 | 1.2   |
| 13604674 | 45.2 | 6.5   |
| 13604678 | 67.4 | 2.2   |
| 13604679 | 14.3 | 6.1   |
| 13604680 | 12.3 | 108.4 |
| 13604681 | 13.0 | 3.7   |
| 13604682 | 78.1 | 28.2  |
| 13604683 | 66.9 | 42.9  |
| 13604684 | 12.2 | 47.9  |
| 13604686 | 6.7  | 1.2   |
| 13604687 | 62.5 | 3.8   |
| 13604688 | 36.0 | 4.7   |
| 13604689 | 78.8 | 15.1  |
| 13604690 | 44.7 | 8.8   |
| 13604691 | 25.8 | 3.4   |
| 13604693 | 70.3 | 11.4  |
| 13604694 | 62.7 | 12.6  |
| 13604696 | 15.4 | 9.6   |
| 13604697 | 54.1 | 42.2  |
| 13604703 | 26.1 | 5     |
| 13604707 | 38.1 | 41.1  |
| 13604709 | 28.8 | 4.1   |
| 13604712 | 0.7  | 4.3   |
| 13604713 | 58.9 | 117   |
| 13604715 | 15.5 | 24.6  |
| 13604716 | 23.4 | 35.3  |
| 13604717 | 19.8 | 1     |

|          |      |       |
|----------|------|-------|
| 13604722 | 16.1 | 7.4   |
| 13604723 | 32.4 | 2.7   |
| 13604724 | 76.9 | 6.2   |
| 13604725 | 31.9 | 1     |
| 13604726 | 3.8  | 1     |
| 13604728 | 18.6 | 1.4   |
| 13604731 | 55.3 | 2.9   |
| 13604733 | 69.1 | 32.3  |
| 13604740 | 33.3 | 13.8  |
| 13604741 | 35.5 | 26.1  |
| 13604743 | 29.1 | 1     |
| 13604744 | 79.5 | 3.9   |
| 13604746 | 11.5 | 1     |
| 13604747 | 46.1 | 3.8   |
| 13604749 | 79.2 | 12.3  |
| 13604750 | 62.6 | 12.4  |
| 13604751 | 47.5 | 60.3  |
| 13604754 | 78.5 | 9.4   |
| 13604755 | 1.5  | 7.6   |
| 13604762 | 75.4 | 22    |
| 13604764 | 10.9 | 14    |
| 13604767 | 57.8 | 1.1   |
| 13604769 | 24.2 | 23.6  |
| 13604770 | 30.9 | 4.3   |
| 13604778 | 22.9 | 1.8   |
| 13604781 | 28.3 | 1.8   |
| 13604783 | 9.0  | 3     |
| 13604784 | 38.8 | 9.2   |
| 13604786 | 51.9 | 2.4   |
| 13604787 | 52.5 | 4.2   |
| 13604788 | 33.0 | 28.1  |
| 13604794 | 28.0 | 4     |
| 13604798 | 9.7  | 60.2  |
| 13604799 | 24.6 | 18.7  |
| 13604800 | 31.8 | 115.6 |
| 13604803 | 52.2 | 10.2  |
| 13604804 | 66.0 | 75.5  |
| 13604806 | 70.0 | 134.3 |
| 13604807 | 58.1 | 1     |
| 13604809 | 60.3 | 22.4  |
| 13604813 | 77.9 | 71    |
| 13604817 | 4.1  | 4.6   |
| 13604820 | 3.9  | 2.1   |
| 13604821 | 76.1 | 18.6  |
| 13604825 | 10.7 | 7.9   |
| 13604828 | 14.1 | 28.4  |
| 13604830 | 71.2 | 20.3  |
| 13604831 | 75.7 | 42.6  |
| 13604832 | 9.2  | 206.9 |
| 13604833 | 67.3 | 23.4  |
| 13604834 | 28.1 | 2.9   |
| 13604835 | 73.9 | 1     |
| 13604838 | 56.4 | 3.3   |
| 13604840 | 35.7 | 6.4   |
| 13604841 | 16.8 | 3.5   |
| 13604842 | 8.9  | 15.9  |
| 13604844 | 28.2 | 4.3   |



|          |      |       |
|----------|------|-------|
| 13604846 | 31.2 | 165.8 |
| 13604849 | 53.8 | 4.3   |
| 13604850 | 25.4 | 280.1 |
| 13604851 | 34.7 | 7.1   |
| 13604852 | 29.5 | 22.3  |
| 13604853 | 42.5 | 6.6   |
| 13604862 | 47.8 | 1.5   |
| 13604865 | 0.2  | 1     |
| 13604866 | 71.9 | 83    |
| 13604871 | 54.9 | 74.9  |
| 13604873 | 10.4 | 21.9  |
| 13604878 | 78.6 | 2.2   |
| 13604880 | 3.5  | 1.2   |
| 13604884 | 3.2  | 3.9   |
| 13604886 | 9.3  | 1     |
| 13604888 | 26.8 | 27.2  |
| 13604891 | 21.8 | 17.7  |
| 13604892 | 34.5 | 12.8  |
| 13604896 | 20.5 | 9.6   |
| 13604900 | 66.1 | 2.7   |
| 13604902 | 69.1 | 18.7  |
| 13604903 | 43.8 | 11.4  |
| 13604904 | 53.0 | 25.1  |
| 13604905 | 78.0 | 60.3  |
| 13604906 | 38.5 | 3.7   |
| 13604907 | 29.8 | 19    |
| 13604908 | 62.4 | 2.3   |
| 13604909 | 70.6 | 1.3   |
| 13604910 | 65.4 | 1     |
| 13604912 | 78.8 | 26.9  |
| 13604913 | 60.6 | 1.4   |
| 13604916 | 68.7 | 32    |
| 13604917 | 72.3 | 86    |
| 13604919 | 4.9  | 12    |
| 13604921 | 12.5 | 6.4   |
| 13604922 | 52.8 | 9.3   |
| 13604923 | 15.6 | 1     |
| 13604925 | 67.4 | 30.7  |
| 13604927 | 70.8 | 5.9   |
| 13604929 | 41.7 | 23.3  |
| 13604930 | 66.0 | 3.4   |
| 13604931 | 12.5 | 7.4   |
| 13604933 | 50.7 | 3.5   |
| 13604935 | 47.5 | 2.3   |
| 13604936 | 13.5 | 17.6  |
| 13604938 | 48.1 | 10.8  |
| 13604939 | 30.5 | 16.3  |
| 13604941 | 37.1 | 45.2  |
| 13604942 | 18.8 | 1     |
| 13604943 | 46.2 | 6.6   |
| 13604944 | 19.6 | 69.4  |
| 13604945 | 34.8 | 7.9   |
| 13604949 | 51.8 | 1     |
| 13604950 | 58.7 | 28.3  |
| 13604951 | 56.3 | 28.3  |
| 13604953 | 15.3 | 23.4  |
| 13604955 | 34.5 | 114.4 |

|          |      |       |
|----------|------|-------|
| 13604956 | 65.3 | 22.4  |
| 13604959 | 34.8 | 20.5  |
| 13604963 | 46.8 | 13    |
| 13604967 | 17.0 | 6.3   |
| 13604975 | 31.3 | 5.3   |
| 13604976 | 55.7 | 5.4   |
| 13604978 | 26.0 | 1     |
| 13604979 | 35.5 | 17.8  |
| 13604980 | 29.8 | 41.8  |
| 13604981 | 0.2  | 7.9   |
| 13604983 | 40.6 | 148.6 |
| 13604989 | 10.6 | 34.2  |
| 13604991 | 0.8  | 13.2  |
| 13604993 | 9.9  | 19.5  |
| 13604996 | 23.7 | 2.2   |
| 13605002 | 54.1 | 1.4   |
| 13605005 | 60.3 | 3.2   |
| 13605006 | 26.1 | 5.3   |
| 13605007 | 68.3 | 8.7   |
| 13605008 | 20.5 | 11.4  |
| 13605013 | 37.4 | 4.9   |
| 13605016 | 42.9 | 3.2   |
| 13605023 | 23.2 | 3.2   |
| 13605026 | 58.5 | 9.9   |
| 13605028 | 35.8 | 171   |
| 13605033 | 14.7 | 4.1   |
| 13605034 | 31.9 | 6.1   |
| 13605042 | 47.5 | 8.5   |
| 13605044 | 28.5 | 27.9  |
| 13605049 | 53.5 | 22.3  |
| 13605051 | 2.7  | 2.3   |
| 13605052 | 20.9 | 24.8  |
| 13605054 | 8.0  | 3.4   |
| 13605055 | 1.4  | 21.8  |
| 13605056 | 76.8 | 4.4   |
| 13605061 | 20.9 | 55.4  |
| 13605066 | 14.4 | 11.4  |
| 13605067 | 65.7 | 7.1   |
| 13605068 | 21.1 | 25.8  |
| 13605069 | 14.7 | 199.5 |
| 13605074 | 54.4 | 1.3   |
| 13605075 | 48.2 | 6.5   |
| 13605078 | 67.5 | 1.9   |
| 13605079 | 19.6 | 8.6   |
| 13605081 | 25.3 | 1.4   |
| 13605083 | 42.2 | 1     |
| 13605085 | 40.0 | 5.6   |
| 13605087 | 18.8 | 25.4  |
| 13605088 | 50.6 | 3.8   |
| 13605090 | 0.8  | 11.9  |
| 13605095 | 12.5 | 1     |
| 13605097 | 50.6 | 1     |
| 13605099 | 0.6  | 20.2  |
| 13605101 | 50.1 | 1.5   |
| 13605103 | 39.6 | 2.1   |
| 13605105 | 70.8 | 10    |
| 13605107 | 21.7 | 9.4   |

|          |      |       |
|----------|------|-------|
| 13605109 | 2.9  | 1.2   |
| 13605111 | 1.4  | 7.4   |
| 13605112 | 70.8 | 1     |
| 13605113 | 33.0 | 30.2  |
| 13605115 | 10.4 | 4.2   |
| 13605119 | 67.1 | 15.5  |
| 13605121 | 27.6 | 4.8   |
| 13605123 | 7.2  | 2.3   |
| 13605125 | 41.9 | 839   |
| 13605126 | 10.7 | 43.4  |
| 13605127 | 58.2 | 49    |
| 13605129 | 79.0 | 5.3   |
| 13605130 | 68.5 | 5.2   |
| 13605133 | 10.8 | 86.3  |
| 13605134 | 38.1 | 1.9   |
| 13605139 | 0.3  | 10    |
| 13605141 | 10.9 | 7.4   |
| 13605144 | 32.5 | 43.1  |
| 13605145 | 10.6 | 1     |
| 13605146 | 31.2 | 2.6   |
| 13605150 | 32.9 | 5.1   |
| 13605152 | 9.1  | 4.9   |
| 13605156 | 43.0 | 26.6  |
| 13605158 | 24.4 | 13.8  |
| 13605160 | 23.1 | 20    |
| 13605162 | 22.9 | 1.6   |
| 13605164 | 34.3 | 17.8  |
| 13605165 | 59.9 | 24.7  |
| 13605166 | 28.8 | 8.4   |
| 13605169 | 47.8 | 41.3  |
| 13605170 | 46.8 | 25.8  |
| 13605172 | 49.0 | 14.3  |
| 13605173 | 0.3  | 60    |
| 13605174 | 49.7 | 28.9  |
| 13605178 | 60.5 | 67.9  |
| 13605179 | 23.3 | 19    |
| 13605180 | 49.0 | 8.2   |
| 13605182 | 20.5 | 9.6   |
| 13605185 | 31.4 | 83.5  |
| 13605186 | 57.0 | 4.9   |
| 13605188 | 0.2  | 3     |
| 13605189 | 26.9 | 11.7  |
| 13605190 | 18.9 | 94.9  |
| 13605193 | 32.8 | 33.7  |
| 13605196 | 38.3 | 12.1  |
| 13605198 | 32.6 | 27.5  |
| 13605202 | 64.3 | 81.4  |
| 13605203 | 69.4 | 18.3  |
| 13605205 | 63.1 | 32.1  |
| 13605206 | 35.5 | 2.7   |
| 13605207 | 63.6 | 3.4   |
| 13605209 | 65.2 | 128.6 |
| 13605211 | 73.2 | 25.8  |
| 13605212 | 77.9 | 4.5   |
| 13605214 | 2.8  | 1     |
| 13605218 | 55.0 | 2.9   |
| 13605219 | 79.9 | 15    |

|          |      |       |
|----------|------|-------|
| 13605220 | 60.6 | 7.7   |
| 13605221 | 77.0 | 141.4 |
| 13605222 | 62.7 | 22    |
| 13605224 | 65.4 | 1.6   |
| 13605225 | 69.8 | 29.7  |
| 13605227 | 11.9 | 209.9 |
| 13605231 | 7.6  | 51.8  |
| 13605232 | 9.2  | 38.8  |
| 13605235 | 8.5  | 95.3  |
| 13605236 | 6.5  | 13.7  |
| 13605237 | 4.9  | 4.3   |
| 13605238 | 12.7 | 54    |
| 13605239 | 4.8  | 15.2  |
| 13605240 | 16.6 | 1     |
| 13605243 | 29.2 | 6     |
| 13605248 | 39.0 | 20    |
| 13605250 | 33.8 | 14.9  |
| 13605254 | 55.7 | 17.3  |
| 13605255 | 38.9 | 3.3   |
| 13605258 | 45.8 | 19.6  |
| 13605259 | 74.5 | 2.2   |
| 13605260 | 30.7 | 30.2  |
| 13605261 | 51.0 | 9.7   |
| 13605262 | 45.7 | 1     |
| 13605264 | 44.9 | 17.8  |
| 13605266 | 20.7 | 9     |
| 13605267 | 38.6 | 4.8   |
| 13605268 | 29.5 | 14.9  |
| 13605270 | 29.9 | 1     |
| 13605271 | 56.0 | 4.7   |
| 13605276 | 62.7 | 21.7  |
| 13605277 | 1.8  | 12.4  |
| 13605280 | 19.4 | 1.1   |
| 13605282 | 53.5 | 47.1  |
| 13605283 | 31.8 | 26.1  |
| 13605285 | 63.1 | 9.9   |
| 13605286 | 68.5 | 5.2   |
| 13605289 | 68.4 | 17.3  |
| 13605290 | 47.5 | 5.4   |
| 13605295 | 8.8  | 23.5  |
| 13605299 | 11.3 | 2.5   |
| 13605300 | 50.0 | 5.2   |
| 13605302 | 42.1 | 10.3  |
| 13605303 | 16.7 | 24.6  |
| 13605305 | 12.2 | 2.5   |
| 13605307 | 21.2 | 77.1  |
| 13605308 | 65.5 | 1     |
| 13605312 | 18.1 | 8.7   |
| 13605315 | 32.9 | 7.7   |
| 13605316 | 32.4 | 3.2   |
| 13605317 | 39.2 | 7.4   |
| 13605318 | 26.4 | 17.9  |
| 13605324 | 28.3 | 5.2   |
| 13605327 | 52.2 | 53.2  |
| 13605329 | 54.7 | 26.7  |
| 13605330 | 26.8 | 13.7  |
| 13605331 | 5.4  | 3.8   |

|          |      |       |
|----------|------|-------|
| 13605332 | 19.9 | 1.6   |
| 13605333 | 37.2 | 1.5   |
| 13605334 | 59.3 | 6.7   |
| 13605339 | 69.7 | 1     |
| 13605340 | 43.0 | 1     |
| 13605341 | 49.9 | 24    |
| 13605342 | 25.6 | 15.4  |
| 13605347 | 57.6 | 5.9   |
| 13605348 | 49.9 | 138.6 |
| 13605349 | 55.9 | 13.6  |
| 13605350 | 76.7 | 2.1   |
| 13605351 | 46.9 | 14    |
| 13605354 | 3.6  | 1     |
| 13605355 | 28.5 | 4.9   |
| 13605356 | 43.3 | 3.9   |
| 13605357 | 26.5 | 2.1   |
| 13605361 | 60.3 | 1.5   |
| 13605362 | 41.5 | 34.2  |
| 13605363 | 20.1 | 26.8  |
| 13605364 | 36.0 | 130.2 |
| 13605365 | 51.8 | 34.7  |
| 13605366 | 40.9 | 39.2  |
| 13605367 | 58.0 | 13.5  |
| 13605369 | 69.9 | 12.9  |
| 13605370 | 0.2  | 1.5   |
| 13605372 | 44.0 | 169.8 |
| 13605374 | 37.7 | 3.7   |
| 13605377 | 37.5 | 10.8  |
| 13605379 | 41.7 | 8.9   |
| 13605380 | 66.0 | 3.9   |
| 13605382 | 62.8 | 11.9  |
| 13605388 | 67.6 | 1.4   |
| 13605390 | 67.8 | 205.1 |
| 13605397 | 45.5 | 9.5   |
| 13605399 | 48.6 | 3.2   |
| 13605400 | 16.0 | 5.8   |
| 13605401 | 13.0 | 2.8   |
| 13605402 | 14.1 | 19    |
| 13605407 | 64.0 | 13.3  |
| 13605409 | 74.1 | 2.2   |
| 13605411 | 16.5 | 33.2  |
| 13605413 | 49.1 | 6.9   |
| 13605414 | 22.6 | 3.4   |
| 13605415 | 54.2 | 22.5  |
| 13605417 | 42.5 | 13.7  |
| 13605418 | 63.4 | 4.5   |
| 13605420 | 56.4 | 3.4   |
| 13605421 | 53.3 | 18    |
| 13605422 | 55.4 | 13.5  |
| 13605423 | 57.9 | 38.7  |
| 13605426 | 40.2 | 2     |
| 13605428 | 17.4 | 10.2  |
| 13605431 | 37.0 | 324.9 |
| 13605433 | 36.9 | 157.1 |
| 13605435 | 38.7 | 76.3  |
| 13605438 | 20.5 | 5     |
| 13605440 | 33.4 | 83.9  |

|          |      |        |
|----------|------|--------|
| 13605441 | 32.1 | 46.6   |
| 13605443 | 55.7 | 16.7   |
| 13605445 | 41.7 | 33.5   |
| 13605447 | 0.9  | 4.1    |
| 13605451 | 38.4 | 1      |
| 13605452 | 34.0 | 3.1    |
| 13605454 | 33.0 | 13.9   |
| 13605455 | 75.0 | 35.3   |
| 13605456 | 47.6 | 8.7    |
| 13605458 | 36.0 | 1      |
| 13605464 | 2.0  | 3.3    |
| 13605466 | 47.9 | 26.2   |
| 13605467 | 64.6 | 2.8    |
| 13605468 | 45.9 | 2.9    |
| 13605469 | 1.1  | 46.2   |
| 13605470 | 79.4 | 5.1    |
| 13605471 | 39.6 | 31.3   |
| 13605472 | 65.1 | 1.5    |
| 13605481 | 77.8 | 7.1    |
| 13605485 | 68.4 | 38     |
| 13605487 | 4.6  | 1.4    |
| 13605488 | 6.7  | 1      |
| 13605490 | 16.8 | 1      |
| 13605496 | 58.3 | 24.5   |
| 13605499 | 4.6  | 1.9    |
| 13605500 | 19.4 | 531.1  |
| 13605501 | 28.7 | 2.4    |
| 13605503 | 7.8  | 9.9    |
| 13605504 | 10.5 | 11.1   |
| 13605506 | 44.9 | 1.9    |
| 13605508 | 5.2  | 2      |
| 13605512 | 35.0 | 1574.5 |
| 13605515 | 33.5 | 13     |
| 13605522 | 49.1 | 42.8   |
| 13605523 | 55.0 | 3.8    |
| 13605524 | 20.5 | 7.6    |
| 13605525 | 1.7  | 454.7  |
| 13605526 | 30.8 | 22.4   |
| 13605527 | 37.9 | 2.6    |
| 13605528 | 20.7 | 4.4    |
| 13605529 | 52.1 | 16.9   |
| 13605531 | 50.1 | 3.6    |
| 13605532 | 31.1 | 23.4   |
| 13605535 | 39.3 | 10.6   |
| 13605538 | 20.9 | 10.8   |
| 13605541 | 65.8 | 7.3    |
| 13605543 | 6.9  | 1.4    |
| 13605545 | 76.5 | 36.6   |
| 13605546 | 0.5  | 147.9  |
| 13605547 | 68.2 | 61.1   |
| 13605549 | 50.1 | 42.3   |
| 13605550 | 71.8 | 37.6   |
| 13605552 | 60.9 | 75.7   |
| 13605555 | 68.5 | 1.3    |
| 13605556 | 72.7 | 54.6   |
| 13605557 | 65.0 | 4.1    |
| 13605560 | 76.5 | 33.9   |

|          |      |       |
|----------|------|-------|
| 13605562 | 32.3 | 20.3  |
| 13605565 | 72.9 | 37.7  |
| 13605566 | 69.0 | 18    |
| 13605567 | 77.7 | 1.1   |
| 13605570 | 4.6  | 1     |
| 13605571 | 8.3  | 33.3  |
| 13605575 | 13.1 | 1     |
| 13605576 | 7.6  | 31    |
| 13605579 | 61.2 | 9.1   |
| 13605580 | 14.7 | 56.9  |
| 13605581 | 63.9 | 36.3  |
| 13605582 | 15.9 | 7.6   |
| 13605584 | 16.9 | 12.6  |
| 13605585 | 60.2 | 3.7   |
| 13605586 | 65.7 | 1     |
| 13605587 | 63.6 | 2.7   |
| 13605591 | 21.7 | 3     |
| 13605592 | 26.6 | 3.9   |
| 13605594 | 44.1 | 42.1  |
| 13605600 | 58.3 | 8.7   |
| 13605601 | 36.5 | 4.3   |
| 13605603 | 52.9 | 35.1  |
| 13605604 | 22.2 | 1     |
| 13605605 | 25.8 | 10    |
| 13605606 | 49.9 | 8.9   |
| 13605610 | 48.1 | 59.5  |
| 13605613 | 3.8  | 2.9   |
| 13605614 | 24.9 | 9.2   |
| 13605618 | 21.9 | 12.9  |
| 13605619 | 39.4 | 63.1  |
| 13605621 | 37.9 | 42    |
| 13605622 | 27.1 | 33.2  |
| 13605624 | 34.4 | 1.7   |
| 13605625 | 55.7 | 2.3   |
| 13605626 | 42.0 | 199.9 |
| 13605629 | 37.4 | 48.7  |
| 13605633 | 11.2 | 1     |
| 13605637 | 0.6  | 13.5  |
| 13605638 | 32.3 | 59.9  |
| 13605639 | 10.0 | 20.8  |
| 13605641 | 54.3 | 40.3  |
| 13605643 | 59.3 | 15.7  |
| 13605647 | 32.1 | 21    |
| 13605649 | 11.3 | 1     |
| 13605650 | 7.3  | 9.9   |
| 13605651 | 79.5 | 134.5 |
| 13605661 | 47.0 | 8.7   |
| 13605664 | 25.5 | 16.4  |
| 13605666 | 60.0 | 1.3   |
| 13605667 | 33.6 | 2.2   |
| 13605668 | 35.7 | 18.7  |
| 13605669 | 47.1 | 6.1   |
| 13605670 | 32.8 | 6     |
| 13605671 | 32.9 | 8.5   |
| 13605672 | 77.1 | 6.5   |
| 13605673 | 30.2 | 1.4   |
| 13605674 | 52.1 | 12    |

|          |      |       |
|----------|------|-------|
| 13605678 | 17.2 | 94.2  |
| 13605679 | 59.3 | 14.6  |
| 13605680 | 24.3 | 4.6   |
| 13605682 | 45.2 | 15.3  |
| 13605685 | 38.4 | 16.3  |
| 13605686 | 20.4 | 6     |
| 13605687 | 30.9 | 1     |
| 13605688 | 20.0 | 4     |
| 13605690 | 41.8 | 63.1  |
| 13605691 | 24.2 | 7.2   |
| 13605692 | 36.7 | 32.3  |
| 13605693 | 28.6 | 7.2   |
| 13605697 | 0.6  | 16.3  |
| 13605700 | 3.2  | 1     |
| 13605701 | 0.4  | 77.2  |
| 13605702 | 9.3  | 237.6 |
| 13605706 | 26.0 | 1     |
| 13605709 | 44.2 | 114.4 |
| 13605711 | 44.7 | 37    |
| 13605717 | 21.4 | 3.2   |
| 13605720 | 69.0 | 4.5   |
| 13605723 | 57.1 | 44.4  |
| 13605726 | 74.3 | 1.4   |
| 13605728 | 62.8 | 6.3   |
| 13605729 | 0.8  | 11.1  |
| 13605738 | 75.4 | 12.6  |
| 13605739 | 35.4 | 4.2   |
| 13605740 | 60.1 | 22.8  |
| 13605741 | 64.6 | 3.3   |
| 13605745 | 43.3 | 14.3  |
| 13605752 | 33.0 | 32.9  |
| 13605757 | 0.1  | 5.1   |
| 13605758 | 22.9 | 19    |
| 13605759 | 1.9  | 55.7  |
| 13605762 | 24.3 | 3.7   |
| 13605765 | 32.5 | 14.2  |
| 13605767 | 31.1 | 14.6  |
| 13605776 | 56.6 | 5.7   |
| 13605777 | 0.9  | 12.4  |
| 13605780 | 56.1 | 35.2  |
| 13605783 | 54.7 | 7.3   |
| 13605784 | 55.9 | 1.7   |
| 13605787 | 4.4  | 3     |
| 13605789 | 30.5 | 10.1  |
| 13605790 | 36.8 | 39.2  |
| 13605792 | 10.9 | 1     |
| 13605797 | 31.7 | 1     |
| 13605798 | 35.6 | 30.7  |
| 13605800 | 21.0 | 1     |
| 13605805 | 52.7 | 1.2   |
| 13605816 | 10.0 | 115.1 |
| 13605828 | 59.8 | 4.1   |
| 13605829 | 43.1 | 26.7  |
| 13605830 | 53.9 | 1     |
| 13605832 | 67.6 | 6     |
| 13605834 | 32.4 | 17.7  |
| 13605837 | 23.6 | 2.7   |



|          |      |       |
|----------|------|-------|
| 13605841 | 62.2 | 2.1   |
| 13605842 | 39.7 | 69.8  |
| 13605844 | 49.1 | 11.5  |
| 13605849 | 40.1 | 27.6  |
| 13605850 | 10.8 | 31.4  |
| 13605855 | 3.7  | 10.1  |
| 13605878 | 61.3 | 2.6   |
| 13605881 | 67.1 | 7.8   |
| 13605882 | 62.1 | 15.4  |
| 13605884 | 60.6 | 94.9  |
| 13605891 | 67.0 | 1     |
| 13605896 | 24.7 | 1     |
| 13605898 | 48.2 | 1.5   |
| 13605901 | 52.6 | 1.6   |
| 13605903 | 54.1 | 253.6 |
| 13605904 | 51.6 | 24.3  |
| 13605907 | 49.5 | 12.2  |
| 13605908 | 47.9 | 56.3  |
| 13605911 | 32.0 | 7.5   |
| 13605916 | 32.5 | 25.8  |
| 13605920 | 18.5 | 2     |
| 13605928 | 44.3 | 163.8 |
| 13605932 | 56.8 | 1     |
| 13605946 | 1.9  | 92.2  |
| 13605947 | 46.8 | 10    |
| 13605953 | 36.5 | 70.1  |
| 13605954 | 1.1  | 272.6 |
| 13605960 | 46.6 | 9.3   |
| 13605972 | 10.8 | 5     |
| 13605976 | 10.4 | 6.7   |
| 13605980 | 12.5 | 2.2   |
| 13605986 | 13.0 | 2.3   |
| 13605993 | 66.4 | 3.7   |
| 13606002 | 39.2 | 4.4   |
| 13606006 | 37.3 | 4.5   |
| 13606007 | 30.4 | 11.7  |
| 13606009 | 17.9 | 1.4   |
| 13606010 | 49.6 | 3.9   |
| 13606013 | 32.3 | 42.9  |
| 13606016 | 35.7 | 7.2   |
| 13606017 | 45.8 | 32.9  |
| 13606021 | 37.5 | 23.3  |
| 13606023 | 21.5 | 1     |
| 13606025 | 69.4 | 46.6  |
| 13606026 | 0.9  | 7.2   |
| 13606028 | 68.3 | 35.2  |
| 13606029 | 60.3 | 15.5  |
| 13606031 | 79.6 | 7.1   |
| 13606033 | 24.1 | 6.3   |
| 13606035 | 40.5 | 5.9   |
| 13606036 | 17.2 | 2.8   |
| 13606038 | 2.5  | 9.6   |
| 13606039 | 31.6 | 4.3   |
| 13606043 | 61.6 | 4.1   |
| 13606045 | 19.6 | 1.2   |
| 13606047 | 4.0  | 2.6   |
| 13606048 | 64.2 | 159.9 |

|          |      |       |
|----------|------|-------|
| 13606050 | 70.9 | 40    |
| 13606052 | 63.3 | 42.6  |
| 13606053 | 66.2 | 49.5  |
| 13606055 | 4.4  | 11.9  |
| 13606056 | 16.6 | 85.7  |
| 13606058 | 59.5 | 55    |
| 13606059 | 67.5 | 17.1  |
| 13606060 | 2.1  | 8.7   |
| 13606062 | 30.2 | 1.7   |
| 13606063 | 36.7 | 11.7  |
| 13606065 | 18.2 | 11    |
| 13606069 | 68.1 | 18.8  |
| 13606070 | 59.6 | 10.4  |
| 13606074 | 52.5 | 24.1  |
| 13606075 | 2.9  | 1.1   |
| 13606076 | 3.8  | 14.4  |
| 13606077 | 59.3 | 21.5  |
| 13606078 | 0.5  | 46.6  |
| 13606080 | 39.9 | 13.7  |
| 13606081 | 47.9 | 5.4   |
| 13606083 | 52.0 | 7.6   |
| 13606085 | 52.9 | 26.4  |
| 13606088 | 23.4 | 24.4  |
| 13606089 | 57.2 | 31.1  |
| 13606090 | 17.0 | 5.9   |
| 13606091 | 35.8 | 2.7   |
| 13606093 | 45.8 | 31.2  |
| 13606094 | 54.4 | 5.3   |
| 13606095 | 56.8 | 145.9 |
| 13606096 | 19.9 | 2.4   |
| 13606097 | 45.2 | 5.1   |
| 13606098 | 36.2 | 61.4  |
| 13606099 | 35.0 | 3     |
| 13606100 | 20.1 | 7.9   |
| 13606102 | 31.7 | 22.2  |
| 13606106 | 38.5 | 17.8  |
| 13606107 | 55.9 | 42.2  |
| 13606108 | 45.3 | 15.4  |
| 13606109 | 21.0 | 2.7   |
| 13606111 | 37.2 | 161.6 |
| 13606114 | 53.5 | 1     |
| 13606115 | 36.2 | 7.6   |
| 13606121 | 30.0 | 17.6  |
| 13606122 | 21.5 | 9.9   |
| 13606123 | 51.4 | 3.4   |
| 13606128 | 8.5  | 1     |
| 13606129 | 60.1 | 1     |
| 13606130 | 11.5 | 2.4   |
| 13606131 | 0.2  | 1     |
| 13606132 | 30.7 | 7     |
| 13606133 | 0.2  | 2.6   |
| 13606135 | 8.7  | 2.5   |
| 13606140 | 9.9  | 19.7  |
| 13606145 | 66.5 | 12.7  |
| 13606147 | 43.2 | 93.1  |
| 13606149 | 43.3 | 20.4  |
| 13606150 | 4.2  | 17.6  |

|          |      |       |
|----------|------|-------|
| 13606151 | 34.9 | 34.4  |
| 13606153 | 63.3 | 9.2   |
| 13606155 | 14.7 | 1     |
| 13606159 | 30.6 | 28.4  |
| 13606160 | 20.2 | 13.5  |
| 13606161 | 0.6  | 29.7  |
| 13606162 | 38.7 | 3.8   |
| 13606163 | 54.1 | 1.1   |
| 13606165 | 26.6 | 1     |
| 13606166 | 51.9 | 4.5   |
| 13606167 | 48.7 | 33.5  |
| 13606168 | 63.9 | 1     |
| 13606173 | 32.2 | 8.6   |
| 13606175 | 23.0 | 45.3  |
| 13606176 | 30.3 | 37.8  |
| 13606177 | 23.8 | 1     |
| 13606179 | 37.2 | 6     |
| 13606180 | 55.8 | 98.6  |
| 13606181 | 17.6 | 2     |
| 13606183 | 53.6 | 3.5   |
| 13606184 | 37.1 | 8.8   |
| 13606185 | 57.4 | 10.4  |
| 13606187 | 44.6 | 2.4   |
| 13606188 | 77.0 | 36.1  |
| 13606191 | 39.3 | 19.2  |
| 13606197 | 34.8 | 3     |
| 13606198 | 28.9 | 12.5  |
| 13606199 | 21.8 | 17.4  |
| 13606200 | 0.5  | 44.6  |
| 13606202 | 25.5 | 1     |
| 13606203 | 22.9 | 1     |
| 13606208 | 3.4  | 1     |
| 13606209 | 21.1 | 1     |
| 13606215 | 3.8  | 1     |
| 13606216 | 60.7 | 32.4  |
| 13606221 | 33.0 | 7     |
| 13606224 | 58.0 | 6.4   |
| 13606229 | 0.4  | 3.5   |
| 13606230 | 34.1 | 111   |
| 13606231 | 7.8  | 5.2   |
| 13606233 | 17.6 | 3.6   |
| 13606236 | 38.0 | 11.2  |
| 13606237 | 10.6 | 3     |
| 13606238 | 10.1 | 4.8   |
| 13606239 | 31.1 | 35.7  |
| 13606241 | 34.6 | 1.2   |
| 13606243 | 60.5 | 11    |
| 13606244 | 20.6 | 119.6 |
| 13606246 | 37.9 | 13    |
| 13606251 | 0.8  | 9.8   |
| 13606252 | 70.3 | 1     |
| 13606253 | 54.2 | 2.5   |
| 13606254 | 73.1 | 37.4  |
| 13606255 | 56.1 | 5.6   |
| 13606257 | 4.7  | 1.2   |
| 13606260 | 24.5 | 1     |
| 13606264 | 17.5 | 23.5  |

|          |      |       |
|----------|------|-------|
| 13606266 | 64.2 | 8.5   |
| 13606269 | 52.9 | 9.1   |
| 13606273 | 28.6 | 4     |
| 13606276 | 52.9 | 18.8  |
| 13606277 | 32.2 | 2.5   |
| 13606278 | 37.1 | 6.8   |
| 13606280 | 49.2 | 4.3   |
| 13606281 | 0.7  | 15.5  |
| 13606284 | 60.6 | 18.6  |
| 13606288 | 9.8  | 21.9  |
| 13606289 | 49.3 | 1     |
| 13606290 | 30.5 | 8.1   |
| 13606291 | 38.3 | 6.3   |
| 13606294 | 31.3 | 12    |
| 13606296 | 51.8 | 15.9  |
| 13606297 | 29.9 | 38.3  |
| 13606303 | 27.6 | 6.9   |
| 13606304 | 44.8 | 6.4   |
| 13606305 | 77.6 | 26    |
| 13606307 | 27.7 | 29.9  |
| 13606308 | 2.8  | 2.2   |
| 13606309 | 41.4 | 1.8   |
| 13606310 | 29.3 | 5.1   |
| 13606312 | 65.7 | 32.8  |
| 13606313 | 7.6  | 6.3   |
| 13606314 | 42.3 | 14.6  |
| 13606319 | 30.4 | 14.6  |
| 13606323 | 39.3 | 1     |
| 13606324 | 71.6 | 4.2   |
| 13606325 | 65.0 | 44.1  |
| 13606326 | 0.2  | 1.8   |
| 13606327 | 8.4  | 106.1 |
| 13606328 | 7.1  | 8.6   |
| 13606331 | 16.8 | 9.8   |
| 13606332 | 70.3 | 24.8  |
| 13606338 | 0.3  | 2.3   |
| 13606340 | 0.7  | 72    |
| 13606341 | 63.2 | 2.9   |
| 13606342 | 36.5 | 12    |
| 13606343 | 4.4  | 1     |
| 13606345 | 78.0 | 94.7  |
| 13606346 | 8.6  | 3.1   |
| 13606347 | 46.4 | 8.7   |
| 13606349 | 0.5  | 64.2  |
| 13606357 | 3.2  | 3.2   |
| 13606365 | 49.7 | 18    |
| 13606366 | 16.2 | 304.8 |
| 13606367 | 31.8 | 4.3   |
| 13606368 | 23.3 | 6.6   |
| 13606371 | 36.2 | 4.1   |
| 13606373 | 53.2 | 15.7  |
| 13606377 | 34.6 | 1     |
| 13606379 | 26.3 | 35.3  |
| 13606381 | 6.6  | 10.3  |
| 13606383 | 19.4 | 20.5  |
| 13606386 | 65.8 | 282.4 |
| 13606387 | 39.6 | 14.2  |

|          |      |      |
|----------|------|------|
| 13606389 | 37.7 | 6.3  |
| 13606390 | 0.4  | 41   |
| 13606391 | 20.9 | 1.6  |
| 13606394 | 51.4 | 1.4  |
| 13606397 | 51.9 | 8.2  |
| 13606398 | 59.6 | 97   |
| 13606399 | 61.2 | 3    |
| 13606400 | 28.5 | 45.9 |
| 13606403 | 34.1 | 16.8 |
| 13606407 | 72.4 | 43.7 |
| 13606408 | 24.4 | 30.9 |
| 13606410 | 72.1 | 1.3  |
| 13606412 | 3.5  | 1    |
| 13606414 | 76.6 | 1.5  |
| 13606415 | 78.5 | 1.5  |
| 13606417 | 78.2 | 7.2  |
| 13606419 | 49.9 | 3.3  |
| 13606423 | 3.3  | 8.8  |
| 13606425 | 4.9  | 5.1  |
| 13606426 | 63.0 | 15.4 |
| 13606428 | 5.7  | 6.2  |
| 13606429 | 46.5 | 3.1  |
| 13606430 | 58.9 | 8.9  |
| 13606431 | 36.0 | 2.9  |
| 13606433 | 0.4  | 18.2 |
| 13606438 | 52.7 | 1    |
| 13606439 | 53.2 | 1    |
| 13606440 | 0.9  | 4.1  |
| 13606441 | 28.2 | 19.8 |
| 13606443 | 37.4 | 4.2  |
| 13606445 | 51.9 | 2.1  |
| 13606446 | 34.7 | 18.1 |
| 13606447 | 17.4 | 53.4 |
| 13606448 | 29.5 | 1    |
| 13606451 | 15.1 | 5    |
| 13606452 | 43.9 | 43.4 |
| 13606454 | 26.4 | 17.7 |
| 13606455 | 43.0 | 3.5  |
| 13606458 | 30.5 | 9.1  |
| 13606460 | 27.6 | 1.6  |
| 13606462 | 55.8 | 12.2 |
| 13606463 | 56.9 | 2.5  |
| 13606465 | 57.6 | 17.8 |
| 13606466 | 51.6 | 24.1 |
| 13606468 | 32.4 | 35.1 |
| 13606471 | 19.5 | 1.9  |
| 13606472 | 24.5 | 9.4  |
| 13606474 | 22.9 | 86.3 |
| 13606475 | 52.9 | 10   |
| 13606476 | 27.6 | 1.4  |
| 13606479 | 6.8  | 21   |
| 13606480 | 51.6 | 11.5 |
| 13606484 | 44.8 | 8.7  |
| 13606486 | 30.7 | 7.6  |
| 13606487 | 14.5 | 3.3  |
| 13606490 | 66.3 | 46.5 |
| 13606507 | 37.5 | 41   |

|          |      |       |
|----------|------|-------|
| 13606508 | 50.2 | 6.3   |
| 13606510 | 5.1  | 11.8  |
| 13606511 | 39.6 | 16.2  |
| 13606512 | 68.8 | 2.3   |
| 13606514 | 43.7 | 14.6  |
| 13606515 | 3.1  | 1     |
| 13606517 | 14.0 | 1.8   |
| 13606520 | 39.1 | 17.5  |
| 13606521 | 72.1 | 11.8  |
| 13606522 | 25.1 | 39.4  |
| 13606523 | 22.1 | 3.9   |
| 13606524 | 0.6  | 42.7  |
| 13606525 | 3.5  | 1.6   |
| 13606526 | 62.7 | 5.6   |
| 13606527 | 0.7  | 6.2   |
| 13606528 | 2.2  | 18.4  |
| 13606529 | 36.3 | 1     |
| 13606530 | 60.2 | 47.7  |
| 13606533 | 0.7  | 21    |
| 13606535 | 61.3 | 112.1 |
| 13606537 | 4.2  | 2.8   |
| 13606538 | 9.9  | 36.5  |
| 13606541 | 9.6  | 11.5  |
| 13606543 | 10.4 | 2.8   |
| 13606545 | 10.7 | 42.5  |
| 13606550 | 69.5 | 49.6  |
| 13606551 | 75.0 | 6.9   |
| 13606553 | 20.7 | 23.8  |
| 13606554 | 29.2 | 18.1  |
| 13606555 | 10.7 | 112.5 |
| 13606558 | 52.6 | 295.2 |
| 13606560 | 41.3 | 3.2   |
| 13606561 | 25.7 | 15    |
| 13606564 | 47.5 | 7.5   |
| 13606565 | 18.2 | 1.1   |
| 13606568 | 61.4 | 3.4   |
| 13606569 | 35.9 | 9.5   |
| 13606570 | 36.2 | 25.8  |
| 13606572 | 3.4  | 1     |
| 13606573 | 36.8 | 120.3 |
| 13606574 | 37.4 | 4.7   |
| 13606576 | 17.5 | 8.4   |
| 13606577 | 27.9 | 73.3  |
| 13606578 | 50.2 | 7.3   |
| 13606580 | 0.9  | 7.3   |
| 13606581 | 21.9 | 12    |
| 13606583 | 41.7 | 2.3   |
| 13606585 | 31.2 | 4.4   |
| 13606589 | 43.7 | 6.2   |
| 13606593 | 60.0 | 17.6  |
| 13606595 | 73.2 | 182.4 |
| 13606601 | 65.9 | 168.4 |
| 13606602 | 77.2 | 1.3   |
| 13606604 | 0.3  | 22.3  |
| 13606606 | 63.2 | 1     |
| 13606609 | 15.7 | 4.7   |
| 13606610 | 61.0 | 1     |

|          |      |       |
|----------|------|-------|
| 13606615 | 13.6 | 7.8   |
| 13606617 | 14.0 | 3.7   |
| 13606618 | 13.0 | 1     |
| 13606620 | 45.1 | 22.6  |
| 13606623 | 7.8  | 5.3   |
| 13606624 | 34.2 | 17.7  |
| 13606625 | 20.5 | 176.8 |
| 13606626 | 37.2 | 33.5  |
| 13606627 | 55.7 | 33    |
| 13606629 | 22.2 | 2.2   |
| 13606630 | 20.9 | 14.4  |
| 13606632 | 51.7 | 34.6  |
| 13606633 | 63.1 | 3.3   |
| 13606635 | 15.3 | 14.3  |
| 13606637 | 33.0 | 12.3  |
| 13606638 | 30.1 | 2.3   |
| 13606639 | 55.4 | 1.3   |
| 13606640 | 31.5 | 2.6   |
| 13606641 | 68.4 | 12    |
| 13606642 | 10.8 | 1     |
| 13606645 | 59.5 | 32.1  |
| 13606646 | 73.8 | 4.2   |
| 13606651 | 3.2  | 4.1   |
| 13606654 | 53.6 | 342.8 |
| 13606655 | 1.0  | 16.6  |
| 13606656 | 31.3 | 24.6  |
| 13606657 | 42.8 | 10.6  |
| 13606659 | 43.0 | 9.3   |
| 13606662 | 9.4  | 2.4   |
| 13606667 | 20.6 | 41.5  |
| 13606668 | 32.8 | 96    |
| 13606670 | 26.0 | 6.2   |
| 13606671 | 33.8 | 12.1  |
| 13606672 | 13.0 | 73.8  |
| 13606674 | 37.9 | 1     |
| 13606676 | 4.5  | 5.3   |
| 13606677 | 12.4 | 31.7  |
| 13606679 | 49.1 | 49.9  |
| 13606680 | 31.7 | 1     |
| 13606681 | 22.0 | 28    |
| 13606682 | 24.6 | 24    |
| 13606685 | 44.0 | 17.8  |
| 13606687 | 71.3 | 36.1  |
| 13606691 | 30.0 | 4.8   |
| 13606692 | 10.4 | 6.7   |
| 13606693 | 34.4 | 35.4  |
| 13606694 | 14.9 | 6.3   |
| 13606695 | 24.4 | 3.1   |
| 13606697 | 59.6 | 1.1   |
| 13606698 | 4.1  | 16.2  |
| 13606701 | 70.1 | 243.7 |
| 13606702 | 2.4  | 39.4  |
| 13606703 | 49.3 | 15.3  |
| 13606705 | 33.5 | 11.9  |
| 13606707 | 0.2  | 1.6   |
| 13606709 | 79.9 | 35.1  |
| 13606711 | 43.9 | 63.5  |

|          |      |        |
|----------|------|--------|
| 13606712 | 63.4 | 19.4   |
| 13606716 | 60.8 | 11.6   |
| 13606720 | 60.8 | 7.6    |
| 13606721 | 13.5 | 242.9  |
| 13606722 | 15.5 | 1      |
| 13606723 | 30.3 | 1.9    |
| 13606724 | 14.1 | 2736.5 |
| 13606727 | 2.9  | 9.4    |
| 13606728 | 15.7 | 1      |
| 13606729 | 77.6 | 87.1   |
| 13606730 | 68.9 | 4.9    |
| 13606734 | 55.1 | 27.5   |
| 13606736 | 56.1 | 13.7   |
| 13606739 | 2.5  | 8      |
| 13606740 | 0.9  | 8.9    |
| 13606743 | 61.0 | 10.1   |
| 13606745 | 60.4 | 10.2   |
| 13606746 | 31.4 | 4.2    |
| 13606750 | 38.3 | 9.9    |
| 13606752 | 32.7 | 6.2    |
| 13606753 | 46.1 | 11     |
| 13606754 | 68.2 | 7.1    |
| 13606755 | 7.2  | 464.1  |
| 13606757 | 16.2 | 31.6   |
| 13606758 | 55.7 | 15.9   |
| 13606759 | 39.0 | 4      |
| 13606760 | 31.3 | 1.8    |
| 13606762 | 29.3 | 18.7   |
| 13606764 | 75.3 | 16.8   |
| 13606765 | 41.2 | 1      |
| 13606767 | 18.2 | 192.2  |
| 13606768 | 35.4 | 10.7   |
| 13606770 | 10.6 | 134.8  |
| 13606771 | 35.3 | 3.9    |
| 13606776 | 25.6 | 22.1   |
| 13606777 | 43.5 | 5.4    |
| 13606778 | 17.0 | 53.2   |
| 13606779 | 72.0 | 1      |
| 13606780 | 7.6  | 13.9   |
| 13606782 | 12.6 | 11.2   |
| 13606783 | 2.8  | 2.7    |
| 13606785 | 71.7 | 19.9   |
| 13606786 | 36.2 | 4.6    |
| 13606789 | 0.3  | 1.4    |
| 13606790 | 8.0  | 5.3    |
| 13606793 | 76.8 | 1.8    |
| 13606796 | 6.6  | 8.4    |
| 13606798 | 71.3 | 24.2   |
| 13606799 | 0.8  | 29     |
| 13606801 | 9.2  | 5.8    |
| 13606803 | 4.7  | 146.5  |
| 13606804 | 2.0  | 18.9   |
| 13606806 | 15.5 | 8.5    |
| 13606811 | 49.0 | 56.1   |
| 13606815 | 18.4 | 12.3   |
| 13606816 | 61.0 | 6.3    |
| 13606817 | 0.1  | 20.2   |



|          |      |       |
|----------|------|-------|
| 13606819 | 30.4 | 48.9  |
| 13606820 | 8.6  | 10.7  |
| 13606821 | 49.4 | 24.7  |
| 13606822 | 35.2 | 1     |
| 13606824 | 70.0 | 11.7  |
| 13606825 | 37.9 | 15.4  |
| 13606827 | 43.9 | 24.5  |
| 13606830 | 34.5 | 3.6   |
| 13606831 | 50.6 | 2.8   |
| 13606833 | 24.5 | 22.4  |
| 13606834 | 58.9 | 4.7   |
| 13606836 | 40.5 | 71.7  |
| 13606839 | 29.0 | 31.4  |
| 13606840 | 25.1 | 43.8  |
| 13606841 | 31.9 | 10.1  |
| 13606842 | 43.1 | 44.3  |
| 13606843 | 26.3 | 9.5   |
| 13606846 | 27.1 | 3.9   |
| 13606848 | 35.4 | 19.8  |
| 13606849 | 37.5 | 1     |
| 13606852 | 0.8  | 7.7   |
| 13606853 | 51.7 | 29.3  |
| 13606854 | 62.9 | 11    |
| 13606856 | 0.6  | 38.3  |
| 13606857 | 40.6 | 13.1  |
| 13606858 | 31.6 | 72.2  |
| 13606859 | 24.3 | 19.8  |
| 13606861 | 71.6 | 5.7   |
| 13606864 | 4.5  | 6.9   |
| 13606867 | 9.7  | 1     |
| 13606869 | 69.1 | 7.7   |
| 13606870 | 0.5  | 27.8  |
| 13606872 | 54.9 | 73.9  |
| 13606877 | 62.2 | 3.2   |
| 13606879 | 34.1 | 24    |
| 13606880 | 2.6  | 16.4  |
| 13606885 | 36.5 | 115   |
| 13606890 | 60.4 | 95.1  |
| 13606891 | 67.4 | 311   |
| 13606895 | 78.5 | 4.4   |
| 13606896 | 4.7  | 7.4   |
| 13606900 | 53.7 | 34.4  |
| 13606902 | 0.6  | 32.3  |
| 13606904 | 29.7 | 11.4  |
| 13606907 | 3.9  | 713.1 |
| 13606908 | 13.6 | 15.7  |
| 13606909 | 48.1 | 24.9  |
| 13606912 | 2.5  | 24.2  |
| 13606913 | 0.6  | 32.1  |
| 13606917 | 55.0 | 22.7  |
| 13606920 | 4.4  | 3.9   |
| 13606921 | 18.8 | 130.4 |
| 13606923 | 20.3 | 211.5 |
| 13606926 | 31.2 | 140.3 |
| 13606927 | 31.6 | 158.4 |
| 13606928 | 22.8 | 1     |
| 13606934 | 30.1 | 103.8 |

|          |      |       |
|----------|------|-------|
| 13606937 | 26.3 | 4.4   |
| 13606939 | 35.4 | 18.3  |
| 13606942 | 0.2  | 9.8   |
| 13606943 | 8.7  | 13    |
| 13606945 | 30.8 | 4.5   |
| 13606947 | 13.2 | 74    |
| 13606948 | 21.3 | 51.4  |
| 13606949 | 11.5 | 1     |
| 13606950 | 7.0  | 15.9  |
| 13606951 | 0.2  | 5.1   |
| 13606952 | 27.6 | 1     |
| 13606953 | 49.2 | 29.4  |
| 13606956 | 11.7 | 2.4   |
| 13606957 | 59.3 | 70.1  |
| 13606958 | 71.1 | 2.7   |
| 13606959 | 52.0 | 17.5  |
| 13606961 | 64.3 | 38.4  |
| 13606963 | 20.6 | 15    |
| 13606965 | 23.6 | 9.2   |
| 13606967 | 68.4 | 45.6  |
| 13606970 | 51.6 | 18.9  |
| 13606971 | 0.6  | 102.8 |
| 13606974 | 0.8  | 37.4  |
| 13606975 | 12.6 | 1     |
| 13606980 | 61.9 | 5.8   |
| 13606981 | 20.0 | 17.9  |
| 13606982 | 60.8 | 155.1 |
| 13606984 | 3.1  | 1     |
| 13606986 | 4.2  | 18.8  |
| 13606987 | 50.5 | 44.9  |
| 13606990 | 19.5 | 1     |
| 13606992 | 52.0 | 295.7 |
| 13606994 | 39.4 | 1.6   |
| 13606995 | 27.8 | 8.1   |
| 13606997 | 0.8  | 6.4   |
| 13606998 | 0.5  | 43.2  |
| 13606999 | 15.0 | 6.3   |
| 13607002 | 49.4 | 9.5   |
| 13607111 | 28.2 | 6.9   |
| 13607112 | 61.2 | 4.4   |
| 13607113 | 9.4  | 1     |
| 13607114 | 43.1 | 5.8   |
| 13607115 | 21.5 | 11.8  |
| 13607116 | 35.9 | 119.3 |
| 13607117 | 34.3 | 11.1  |
| 13607118 | 3.5  | 1     |
| 13607120 | 19.2 | 1     |
| 13607121 | 24.9 | 82.3  |
| 13607122 | 3.8  | 1     |
| 13607127 | 0.6  | 23.2  |
| 13607128 | 35.7 | 1     |
| 13607129 | 43.5 | 20.7  |
| 13607131 | 40.3 | 1.9   |
| 13607132 | 31.9 | 2.3   |
| 13607133 | 36.3 | 1.5   |
| 13607134 | 37.5 | 13.4  |
| 13607135 | 39.6 | 20.5  |

|          |      |      |
|----------|------|------|
| 13607296 | 47.1 | 30.6 |
| 13607299 | 0.2  | 1.9  |
| 13607302 | 20.0 | 16.6 |
| 13607310 | 2.5  | 12.7 |
| 13607313 | 32.7 | 1    |
| 13607314 | 31.5 | 1.7  |
| 13607316 | 11.6 | 2.9  |
| 13607318 | 10.0 | 19.2 |
| 13607320 | 0.4  | 74   |
| 13607321 | 21.2 | 1.1  |
| 13607323 | 65.5 | 14.8 |
| 13607325 | 9.5  | 1.3  |
| 13607326 | 46.5 | 10.5 |
| 13607330 | 74.6 | 5.9  |
| 13607333 | 0.6  | 29.4 |
| 13607334 | 0.7  | 26.5 |
| 13607336 | 4.8  | 6.3  |
| 13607337 | 4.7  | 1    |
| 13607340 | 9.8  | 7.4  |
| 13607342 | 10.6 | 16.8 |
| 13607343 | 0.7  | 5.2  |
| 13607346 | 74.0 | 24.6 |
| 13607349 | 15.0 | 1.3  |
| 13607350 | 7.6  | 8.6  |
| 13607353 | 1.0  | 59.4 |
| 13607354 | 13.6 | 2.4  |
| 13607356 | 17.1 | 36.7 |
| 13607358 | 42.5 | 67.3 |
| 13607359 | 8.0  | 3.1  |
| 13607360 | 65.2 | 10.5 |
| 13607361 | 49.0 | 10.9 |
| 13607363 | 22.8 | 12.5 |
| 13607364 | 13.3 | 1    |
| 13607365 | 63.8 | 18.3 |
| 13607366 | 53.4 | 4.9  |
| 13607368 | 54.5 | 5.6  |
| 13607371 | 47.5 | 17.8 |
| 13607372 | 23.2 | 1.6  |
| 13607373 | 2.9  | 1.3  |
| 13607375 | 44.0 | 34.6 |
| 13607377 | 17.6 | 80.3 |
| 13607380 | 16.7 | 1    |
| 13607385 | 19.6 | 5.6  |
| 13607420 | 24.8 | 8.3  |
| 13607421 | 55.3 | 57.1 |
| 13607423 | 0.3  | 3.9  |
| 13607426 | 49.5 | 7.8  |
| 13607427 | 2.3  | 3.9  |
| 13607430 | 48.8 | 4.4  |
| 13607431 | 2.7  | 6.5  |
| 13607432 | 43.5 | 2.4  |
| 13607433 | 40.9 | 10.5 |
| 13607435 | 60.0 | 38.4 |
| 13607436 | 0.5  | 42.9 |
| 13607437 | 8.8  | 1    |
| 13607438 | 48.3 | 35.9 |
| 13607439 | 34.7 | 1    |

|          |      |       |
|----------|------|-------|
| 13607440 | 4.0  | 11.3  |
| 13607441 | 75.2 | 1     |
| 13607442 | 65.0 | 55.1  |
| 13607443 | 4.5  | 15.2  |
| 13607445 | 71.1 | 3.2   |
| 13607446 | 7.8  | 2     |
| 13607447 | 70.4 | 9.6   |
| 13607448 | 53.9 | 1     |
| 13607451 | 45.6 | 7.8   |
| 13607452 | 29.4 | 10.6  |
| 13607453 | 0.8  | 9.4   |
| 13607456 | 19.3 | 3.4   |
| 13607457 | 14.8 | 18.3  |
| 13607459 | 24.1 | 2.9   |
| 13607460 | 12.4 | 21.3  |
| 13607461 | 45.8 | 5.1   |
| 13607462 | 29.3 | 40.9  |
| 13607463 | 3.6  | 1     |
| 13607464 | 58.2 | 86.4  |
| 13607466 | 42.3 | 31.4  |
| 13607467 | 39.7 | 121.3 |
| 13607468 | 4.0  | 9.1   |
| 13607471 | 39.5 | 13.3  |
| 13607472 | 31.2 | 20.2  |
| 13607473 | 33.9 | 87.6  |
| 13607474 | 18.8 | 1.8   |
| 13607475 | 0.6  | 18.9  |
| 13607476 | 20.8 | 1     |
| 13607477 | 0.6  | 45.9  |
| 13607478 | 53.2 | 7.1   |
| 13607479 | 26.0 | 1     |
| 13607481 | 28.1 | 18.7  |
| 13607483 | 22.0 | 1.4   |
| 13607484 | 17.8 | 107.2 |
| 13607485 | 43.1 | 129   |
| 13607488 | 37.1 | 1.8   |
| 13607489 | 30.5 | 7     |
| 13607703 | 29.8 | 212.1 |
| 13607704 | 35.2 | 27.7  |
| 13607705 | 77.9 | 10.9  |
| 13607708 | 18.5 | 1.3   |
| 13607709 | 65.9 | 4.9   |
| 13607710 | 60.8 | 49.6  |
| 13607713 | 0.8  | 22.6  |
| 13607714 | 0.7  | 55.5  |
| 13607715 | 34.2 | 9     |
| 13607716 | 48.1 | 65.9  |
| 13607718 | 72.3 | 39.6  |
| 13607719 | 73.3 | 14.3  |
| 13607720 | 11.9 | 113.1 |
| 13607811 | 68.9 | 9.7   |
| 13607814 | 74.7 | 10.1  |
| 13607816 | 77.6 | 4.8   |
| 13607817 | 51.6 | 5.4   |
| 13607818 | 0.9  | 7.4   |
| 13607819 | 1.7  | 39.2  |
| 13607821 | 38.6 | 21    |

|          |      |       |
|----------|------|-------|
| 13607822 | 51.1 | 2.2   |
| 13607825 | 35.4 | 4.2   |
| 13607827 | 43.8 | 8.7   |
| 13607828 | 39.9 | 28.1  |
| 13607831 | 0.3  | 10.6  |
| 13607832 | 78.3 | 4.6   |
| 13607839 | 71.3 | 11.2  |
| 13607842 | 29.5 | 22.2  |
| 13607844 | 4.3  | 2     |
| 13607848 | 0.8  | 2.6   |
| 13607849 | 78.9 | 11.1  |
| 13607850 | 1.6  | 6.5   |
| 13607852 | 63.5 | 1.1   |
| 13607854 | 77.7 | 77.8  |
| 13607855 | 48.6 | 22.8  |
| 13607857 | 16.9 | 38    |
| 13607861 | 14.8 | 1.4   |
| 13607863 | 10.4 | 36    |
| 13607865 | 16.9 | 3.6   |
| 13607866 | 12.7 | 115.7 |
| 13607871 | 65.1 | 48    |
| 13607874 | 25.5 | 12.1  |
| 13607877 | 16.3 | 11.3  |
| 13607879 | 77.0 | 36.8  |
| 13607880 | 25.4 | 3.1   |
| 13607885 | 60.0 | 15.9  |
| 13607887 | 37.9 | 15.1  |
| 13607888 | 51.7 | 5.7   |
| 13607889 | 36.3 | 12.5  |
| 13607891 | 55.9 | 8.5   |
| 13607892 | 27.7 | 1     |
| 13607897 | 12.1 | 7     |
| 13607899 | 55.2 | 26.9  |
| 13607901 | 0.7  | 53.6  |
| 13607909 | 45.0 | 2.8   |
| 13607915 | 5.3  | 1.7   |
| 13607917 | 48.4 | 9.1   |
| 13607918 | 29.1 | 14.8  |
| 13607920 | 22.7 | 1     |
| 13607922 | 7.2  | 1.7   |
| 13607927 | 1.2  | 41.2  |
| 13607931 | 47.6 | 32.4  |
| 13607934 | 3.0  | 3.1   |
| 13607938 | 36.5 | 1.2   |
| 13607939 | 31.0 | 22.2  |
| 13607940 | 32.4 | 8.9   |
| 13607945 | 62.4 | 10.9  |
| 13607946 | 0.3  | 1.1   |
| 13607949 | 76.5 | 111.2 |
| 13607953 | 30.3 | 3.8   |
| 13607954 | 27.3 | 16.3  |
| 13607960 | 2.9  | 1     |
| 13607961 | 21.2 | 2.2   |
| 13607962 | 65.8 | 13.2  |
| 13607966 | 7.2  | 8.3   |
| 13607968 | 38.1 | 62.2  |
| 13607970 | 61.7 | 24.4  |

|          |      |       |
|----------|------|-------|
| 13607972 | 41.6 | 5.1   |
| 13607983 | 54.9 | 6.8   |
| 13607984 | 1.5  | 24.8  |
| 13607987 | 53.2 | 114.9 |
| 13607988 | 2.3  | 4.8   |
| 13607989 | 0.3  | 34.3  |
| 13607993 | 23.3 | 2.9   |
| 13607996 | 48.1 | 4.9   |
| 13607999 | 50.2 | 6.1   |
| 13608000 | 21.1 | 38.5  |
| 13608002 | 42.9 | 1.6   |
| 13608004 | 26.7 | 24.8  |
| 13608005 | 32.2 | 5.7   |
| 13608007 | 29.6 | 12    |
| 13608008 | 41.2 | 18.9  |
| 13608011 | 37.6 | 5.2   |
| 13608012 | 31.6 | 112.3 |
| 13608013 | 53.4 | 13.1  |
| 13608014 | 5.2  | 176.8 |
| 13608015 | 49.8 | 6     |
| 13608016 | 43.7 | 139.8 |
| 13608017 | 22.4 | 3.9   |
| 13608019 | 0.4  | 88.5  |
| 13608022 | 0.4  | 59.8  |
| 13608024 | 35.0 | 16.3  |
| 13608026 | 29.3 | 22.9  |
| 13608070 | 65.1 | 22.3  |
| 13608078 | 2.8  | 1     |
| 13608079 | 26.3 | 1.9   |
| 13608080 | 24.3 | 10.6  |
| 13608083 | 9.4  | 134.2 |
| 13608088 | 44.6 | 140.8 |
| 13608089 | 36.5 | 13.2  |
| 13608090 | 23.5 | 1     |
| 13608091 | 47.0 | 311.7 |
| 13608093 | 4.0  | 9.2   |
| 13608095 | 38.8 | 1.2   |
| 13608096 | 52.8 | 1     |
| 13608100 | 54.7 | 22.3  |
| 13608101 | 37.2 | 16.5  |
| 13608107 | 35.8 | 9.2   |
| 13608108 | 29.1 | 11.7  |
| 13608109 | 31.0 | 2.5   |
| 13608111 | 35.0 | 4.1   |
